# Supplementary material for: Integrative transcriptomic and metabonomic profiling analyses reveal the molecular mechanism of Chinese traditional medicine huankuile suspension on TNBS-induced ulcerative colitis
Source: Aging (Albany NY). 2021 Feb 1;13(4):5087–103. doi: 10.18632/aging.202427 (PMC7950284; doi:10.18632/aging.202427)
Supplement: Supplementary Table 1 [file aging-13-202427-s001.xlsx]

## Sheet: Sheet1
Supplementary Table 1. The list of differentially expressed genes between HKL treated UC samples and water treated UC samples.
id	name	log2FC(GM/GC)	pval	fdr	regulate	mean_GM	mean_GC	count_M1	count_M2	count_M3	count_C1	count_C2	count_C3	fpkm_M1	fpkm_M2	fpkm_M3	fpkm_C1	fpkm_C2	fpkm_C3
ENSRNOG00000006360	Reg3a	-9.73778	4.38823e-11	6.74207e-07	down	0	85.2817	0	0	0	2328	12	6743	0	0	0	78.841	0.359479	176.645
ENSRNOG00000004678	Itln1	5.80008	1.0661e-10	8.18976e-07	up	729.796	12.9998	11652	45824	32261	187	374	1212	438.018	1020.83	730.535	4.99246	8.93705	25.0698
ENSRNOG00000055835	AABR07065818.1	-8.53717	1.84629e-08	7.09048e-05	down	0	37.0488	0	0	0	132	14	2042	0	0	0	8.46331	0.770435	101.913
ENSRNOG00000006486	Reg1a	-11.3806	2.60427e-08	7.09048e-05	down	0	266.527	0	0	0	11784	0	26669	0	0	0	290.698	0	508.884
ENSRNOG00000017908	Pnliprp1	-10.5787	2.79273e-08	7.09048e-05	down	0	152.831	0	0	0	13186	0	13077	0	0	0	259.454	0	199.039
ENSRNOG00000019879	Sycn	-11.0793	2.99818e-08	7.09048e-05	down	0	216.272	0	0	0	3780	0	10863	0	0	0	201.308	0	447.508
ENSRNOG00000013382	Prss3b	-11.0782	3.49684e-08	7.09048e-05	down	0	216.105	0	0	0	5352	0	15575	0	0	0	199.42	0	448.893
ENSRNOG00000000510	Clps	-10.1953	3.692e-08	7.09048e-05	down	0	117.141	0	0	0	2603	0	6945	0	0	0	114.679	0	236.744
ENSRNOG00000030069	Faim	4.85004	4.4942e-08	7.31492e-05	up	3.11371	0.0114293	70	184	127	0	0	2	2.55291	3.98781	2.8004	0	0	0.034288
ENSRNOG00000013628	Cela2a	-9.69945	5.44081e-08	7.31492e-05	down	0.277846	314.053	5	15	8	9133	8	24873	0.215763	0.39876	0.219016	303.215	0.209828	638.735
ENSRNOG00000046022	LOC100911453	4.65156	5.44912e-08	7.31492e-05	up	2.41338	0	8	320	378	0	0	0	0.124856	3.23525	3.88005	0	0	0
ENSRNOG00000017982	Pnliprp2	-8.59624	5.71329e-08	7.31492e-05	down	0	38.6014	0	0	0	1782	0	5351	0	0	0	34.8473	0	80.9567
ENSRNOG00000049536	Rpl35al1	6.6718	8.05453e-08	9.51921e-05	up	10.0955	0	152	81	66	0	0	0	19.2318	6.05459	5.00028	0	0	0
ENSRNOG00000028243	LOC103694875	5.17857	1.60455e-07	0.000176088	up	3.52165	0	28	71	171	0	0	0	1.68697	2.55917	6.3188	0	0	0
ENSRNOG00000059338	LOC102549714	-8.83059	1.94828e-07	0.000198685	down	0	45.4273	0	0	0	3086	0	985	0	0	0	109.319	0	26.963
ENSRNOG00000032916	Prss2	-8.90566	2.06909e-07	0.000198685	down	0	47.8591	0	0	0	821	0	3502	0	0	0	33.3829	0	110.194
ENSRNOG00000013745	Ctrc	-6.71835	2.3455e-07	0.000211978	down	0.771167	91.633	8	59	39	2977	44	10227	0.282463	1.21449	0.816552	74.8769	0.974224	199.048
ENSRNOG00000045611	Ms4a4a	-7.30698	4.15586e-07	0.000338676	down	0	15.7351	0	0	0	1566	0	878	0	0	0	32.9298	0	14.2756
ENSRNOG00000032156	Prss1	-12.0461	4.23338e-07	0.000338676	down	0.0416367	598.901	0	4	0	10871	0	47897	0	0.12491	0	407.598	0	1389.1
ENSRNOG00000030904	Cpb1	-11.2435	4.4087e-07	0.000338676	down	0.0266447	306.957	0	4	0	10076	0	36261	0	0.079934	0	243.368	0	677.504
ENSRNOG00000010725	Cpa1	-10.6121	4.94375e-07	0.000361694	down	0.0200213	187.756	0	4	0	8567	0	28372	0	0.060064	0	158.144	0	405.125
ENSRNOG00000047557	Rpl35al1	-9.13742	5.25851e-07	0.000367236	down	0	56.2168	0	0	0	1144	0	930	0	0	0	103.535	0	65.1152
ENSRNOG00000018450	LOC100911440	-6.09211	6.29964e-07	0.000420816	down	0	6.72196	0	0	0	628	1192	0	0	0	0	7.4806	12.6853	0
ENSRNOG00000017725	Pnlip	-9.78571	7.60721e-07	0.000486988	down	0.0225577	108.076	0	4	0	3502	0	16108	0	0.067673	0	71.1248	0	253.103
ENSRNOG00000028344	LOC103694874	6.76367	8.10441e-07	0.000498065	up	10.766	0	0	1681	215	0	0	0	0	28.5877	3.71019	0	0	0
ENSRNOG00000001955	Retnla	6.64306	1.02108e-06	0.000603377	up	117.49	1.07655	101	4578	2277	8	0	60	8.50084	228.475	115.495	0.477864	0	2.7518
ENSRNOG00000053185	AABR07006889.1	3.27756	1.38073e-06	0.000785688	up	0.869711	0	13	64	127	0	0	0	0.259605	0.78038	1.56915	0	0	0
ENSRNOG00000045795	LOC100911365	5.82372	1.54634e-06	0.000848498	up	5.56387	0	0	499	491	0	0	0	0	8.34561	8.34601	0	0	0
ENSRNOG00000051970	Aqp5	-4.51172	1.69279e-06	0.000881466	down	0	2.18119	0	0	0	257	37	26	0	0	0	5.42095	0.697977	0.424658
ENSRNOG00000013203	LOC312273	-7.01505	1.72116e-06	0.000881466	down	0	12.8342	0	0	0	442	0	965	0	0	0	14.3085	0	24.1942
ENSRNOG00000030387	Kng1	-2.89421	1.82501e-06	0.000904498	down	0	0.643436	0	0	0	94	30	65	0	0	0	1.06607	0.297134	0.567101
ENSRNOG00000061169	AABR07060952.1	-5.76052	1.92411e-06	0.000923812	down	0.309994	22.1262	5	0	10	270	209	701	0.374123	0	0.55586	17.9191	12.3893	36.0703
ENSRNOG00000055613	LOC103689940	-11.954	2.03848e-06	0.000949067	down	0.0258282	499.116	0	11	0	25386	0	166377	0	0.0774845	0	246.695	0	1250.65
ENSRNOG00000045612	Try5	-7.0826	2.97752e-06	0.00134549	down	0	13.4542	0	0	0	319	0	871	0	0	0	12.9701	0	27.3925
ENSRNOG00000028092	Cpa2	-8.06499	3.17084e-06	0.00139191	down	0.44786	146.614	14	25	22	5206	3	17902	0.448567	0.467453	0.42756	120.169	0.059469	319.614
ENSRNOG00000019068	Ctrb1	-10.1643	3.69282e-06	0.00157601	down	1.17987	1468.59	66	6	8	37465	68	117945	3.15486	0.161109	0.223632	1281.97	2.06968	3121.72
ENSRNOG00000010663	Col6a5	3.24154	5.3038e-06	0.00220237	up	20.271	2.05383	1486	7418	9136	379	463	1073	7.93563	23.4812	29.3962	1.4387	1.56946	3.15333
ENSRNOG00000022707	Pmp2	-3.16044	6.90215e-06	0.00279065	down	0	0.794102	0	0	0	46	38	36	0	0	0	1.00875	0.755204	0.618351
ENSRNOG00000013245	LOC286960	-6.34401	7.47575e-06	0.00287317	down	0	8.0234	0	0	0	352	0	425	0	0	0	12.4359	0	11.6343
ENSRNOG00000031385	Prss3	-6.48599	7.59888e-06	0.00287317	down	0	8.86347	0	0	0	233	0	624	0	0	0	8.65256	0	17.9378
ENSRNOG00000011824	Trh	-5.1928	7.70932e-06	0.00287317	down	0.117924	7.87064	0	20	0	488	153	602	0	0.353771	0	10.5749	2.95701	10.08
ENSRNOG00000038132	Vsig4	-4.6796	7.85429e-06	0.00287317	down	0.0458867	3.63865	0	8	0	245	72	263	0	0.13766	0	5.21438	1.36739	4.3342
ENSRNOG00000019353	Ctrl	-7.11456	9.50837e-06	0.00339736	down	0.467374	78.5261	0	11	34	1505	7	6111	0	0.345302	1.05682	56.8169	0.209184	178.552
ENSRNOG00000004498	Scin	3.1737	1.27051e-05	0.0044364	up	41.4723	4.50707	763	4084	5189	98	450	602	15.0365	47.7296	61.6509	1.3623	5.63262	6.52629
ENSRNOG00000046305	LOC103690163	3.94379	1.56644e-05	0.00534817	up	1.43886	0	0	212	233	0	0	0	0	2.03683	2.27976	0	0	0
ENSRNOG00000010406	Cel	-8.77991	1.65265e-05	0.00551985	down	0.193112	128.739	12	4	24	10853	0	20123	0.239474	0.045132	0.29473	158.667	0	227.551
ENSRNOG00000061237	Dio1	4.21424	1.76321e-05	0.00576383	up	4.58075	0.152175	236	240	254	0	8	23	6.10251	3.67783	3.96191	0	0.130396	0.326128
ENSRNOG00000009903	Serpini2	-5.48041	1.84994e-05	0.00592134	down	0	4.36446	0	0	0	148	0	569	0	0	0	3.2867	0	9.80667
ENSRNOG00000025074	Fgg	-3.81147	2.22614e-05	0.0069801	down	0.0216813	1.6084	0	5	0	110	83	83	0	0.065044	0	2.13275	1.44514	1.24731
ENSRNOG00000049179	LOC100911519	-3.7969	2.76586e-05	0.00849894	down	0	1.28989	0	0	0	220	0	268	0	0	0	1.9926	0	1.87707
ENSRNOG00000046165	Mptx1	10.2581	2.94468e-05	0.00887098	up	379.259	0.209783	8	29817	79	0	0	18	0.501586	1134.23	3.04444	0	0	0.62935
ENSRNOG00000037375	RGD1565410	-4.16454	3.65844e-05	0.0108093	down	0	1.69329	0	0	0	32	47	13	0	0	0	1.95116	2.51716	0.611551
ENSRNOG00000048062	AABR07065815.1	-4.03144	4.34789e-05	0.012604	down	3.30673	55.6084	4	41	92	234	387	1786	0.469175	2.84734	6.60367	19.8579	29.3708	117.596
ENSRNOG00000053037	AABR07024139.1	-3.05427	4.83966e-05	0.0137024	down	0	0.73067	0	0	0	202	0	166	0	0	0	1.33834	0	0.853672
ENSRNOG00000021619	Cela3b	-9.44853	4.90518e-05	0.0137024	down	0.220712	223.981	0	24	0	5788	0	18655	0	0.662135	0	192.368	0	479.574
ENSRNOG00000020625	Mcpt1	3.41697	6.46367e-05	0.0177335	up	96.9488	8.98612	9084	4345	5892	158	796	1440	173.732	49.2432	67.8715	2.13732	9.6759	15.1451
ENSRNOG00000001153	Pla2g1b	-7.17061	6.92632e-05	0.0186695	down	0.627035	104.643	0	0	42	928	17	6429	0	0	1.88111	49.2133	0.80539	263.909
ENSRNOG00000028899	LOC100910807	3.07853	8.01304e-05	0.0212263	up	0.744754	0	0	77	149	0	0	0	0	0.75289	1.48137	0	0	0
ENSRNOG00000000091	LOC103691556	2.24122	8.37028e-05	0.0217968	up	0.372795	0	0	52	197	0	0	0	0	0.230769	0.887617	0	0	0
ENSRNOG00000036826	Glycam1	-7.05555	8.62218e-05	0.0220785	down	0.0938413	25.6856	5	0	0	8	402	1516	0.281524	0	0	0.398611	17.9705	58.6877
ENSRNOG00000015716	Gp2	-6.78326	0.000101709	0.0256174	down	0.723822	90.6397	30	0	204	5514	125	27399	0.426592	0	1.74488	55.9002	1.12807	214.891
ENSRNOG00000051433	LOC103692167	-4.71637	0.000105401	0.026119	down	0	2.52887	0	0	0	0	177	90	0	0	0	0	5.27581	2.31081
ENSRNOG00000000035	Tmed11	-4.98634	0.000143505	0.0347044	down	0	3.06984	0	0	0	65	0	172	0	0	0	3.00683	0	6.2027
ENSRNOG00000051768	AABR07065693.2	-5.85152	0.000144564	0.0347044	down	0	5.6741	0	0	0	42	0	242	0	0	0	3.12329	0	13.899
ENSRNOG00000048159	AABR07065778.3	-3.97093	0.000164077	0.0387828	down	6.38554	101.598	6	151	107	111	913	3391	0.692074	10.7371	7.72747	9.50822	70.0391	225.248
ENSRNOG00000013410	Spink1l	-5.72559	0.000169542	0.0394672	down	0	5.19144	0	0	0	47	0	193	0	0	0	3.73579	0	11.8385
ENSRNOG00000042996	AABR07065798.1	-4.76331	0.000173408	0.0397648	down	1.61926	46.5917	0	61	10	241	140	1705	0	4.19877	0.658992	19.9341	10.341	109.5
ENSRNOG00000048402	Igh-6	-4.72285	0.000194493	0.0439441	down	51.8094	1370.67	855	2297	2426	7272	2285	164658	36.1293	57.5329	61.7659	218.785	61.3965	3831.82
ENSRNOG00000058166	AABR07057495.1	3.44103	0.000212808	0.0473408	up	2.1809	0.110016	68	32	140	6	4	4	2.59757	0.718868	3.22627	0.164284	0.096862	0.068902
ENSRNOG00000006151	Reg3b	-8.28396	0.000218714	0.0473408	down	0.863181	300.113	48	0	0	8123	227	19393	2.58954	0	0	313.512	7.81858	579.008
ENSRNOG00000058424	AABR07057150.1	-4.58141	0.000218771	0.0473408	down	0	2.29409	0	0	0	58	100	0	0	0	0	2.70871	4.17356	0
ENSRNOG00000062308	AC129815.1	-2.25017	0.000227732	0.0485955	down	0	0.375737	0	0	0	57	96	0	0	0	0	0.449619	0.677593	0
ENSRNOG00000040287	Cyp1b1	-3.74636	0.000238213	0.0501357	down	0.249607	4.59189	4	68	91	2198	122	274	0.0306776	0.304449	0.413696	12.028	0.593132	1.1545
ENSRNOG00000055188	Tlx2	3.1423	0.000253253	0.0525809	up	0.782928	0	40	0	63	0	0	0	1.19684	0	1.15194	0	0	0
ENSRNOG00000059898	LOC100909599	1.95196	0.000282699	0.0579119	up	0.2869	0	27	0	83	0	0	0	0.291002	0	0.569699	0	0	0
ENSRNOG00000011181	Cpa3	2.26084	0.000310516	0.0627733	up	23.1607	4.75335	688	2158	1098	185	235	471	18.1922	33.8131	17.4767	3.46499	3.94938	6.84567
ENSRNOG00000056393	AABR07051555.1	-5.16758	0.000345898	0.0680952	down	6.64206	242.22	170	310	180	1218	112	28837	7.3204	7.92387	4.68192	37.4633	3.05969	686.136
ENSRNOG00000050743	Adora3	2.50136	0.000348934	0.0680952	up	0.466218	0	0	49	50	0	0	0	0	0.696258	0.702395	0	0	0
ENSRNOG00000034230	Fcrl1	-2.98291	0.000350138	0.0680952	down	0.0362223	0.976943	0	4	3	32	33	127	0	0.0615034	0.0471635	0.587558	0.53204	1.81123
ENSRNOG00000021027	Dbp	3.00073	0.000362181	0.0695568	up	111.471	13.8393	9888	1482	4431	691	794	1223	246.128	21.8561	66.4279	12.2228	12.5497	16.7453
ENSRNOG00000054428	AABR07060971.1	-4.74326	0.000379879	0.0720551	down	0.73066	22.1478	4	10	15	82	13	889	0.450025	0.707342	1.03461	6.92965	0.978835	58.535
ENSRNOG00000049315	AABR07065827.1	-3.57729	0.000442186	0.0828505	down	21.193	254.062	65	435	341	583	408	10249	7.74801	31.0637	24.7675	50.0558	31.2792	680.85
ENSRNOG00000018311	Cd19	-3.33871	0.000461772	0.0854779	down	0.208074	3.0168	6	20	33	85	97	755	0.099361	0.190995	0.333866	1.01728	1.03047	7.00264
ENSRNOG00000052205	Fgf23	-4.38112	0.000490277	0.089674	down	0.0655347	3.34935	0	6	0	136	6	145	0	0.196604	0	5.39016	0.210196	4.44769
ENSRNOG00000021735	Akr1cl	2.69602	0.000521808	0.0943183	up	20.862	3.13482	274	1228	1594	147	46	293	8.72293	23.2247	30.6385	3.33251	0.93273	5.13921
ENSRNOG00000020030	Crlf1	-2.92237	0.000585855	0.104487	down	3.97541	30.7954	92	586	52	2735	1378	1483	2.32404	8.81169	0.79051	49.4234	22.2392	20.7237
ENSRNOG00000008560	AABR07049790.1	3.01103	0.000591667	0.104487	up	4.53465	0.47492	548	75	425	15	69	63	8.78735	0.711624	4.10498	0.167572	0.702678	0.55451
ENSRNOG00000004947	Zfp871	2.7679	0.000606212	0.105003	up	1.07909	0.0731107	52	30	157	5	7	8	1.01604	0.35058	1.87064	0.056427	0.075613	0.087292
ENSRNOG00000046174	AABR07073146.1	-4.38812	0.00060826	0.105003	down	0	1.99391	0	0	0	38	0	55	0	0	0	2.82522	0	3.15649
ENSRNOG00000029342	Scn7a	2.64794	0.000615106	0.105005	up	3.99516	0.553372	110	734	1499	65	107	158	0.90539	3.60129	7.47879	0.380138	0.56333	0.716648
ENSRNOG00000048696	AABR07065792.2	-4.22229	0.000663783	0.11207	down	1.70763	33.6401	8	56	4	550	30	775	0.881992	3.96655	0.274354	47.1998	2.27107	51.4493
ENSRNOG00000034164	Cr2	-2.53454	0.00067344	0.112464	down	0.0234316	0.615154	0	4	16	18	106	414	0	0.0139518	0.056343	0.0767629	0.403475	1.36522
ENSRNOG00000026764	Pla2g4c	4.06356	0.000696608	0.115083	up	6.00951	0.265387	23	2904	141	48	9	75	0.211737	16.9822	0.834595	0.335363	0.0543673	0.406429
ENSRNOG00000010720	Mast4	3.43203	0.000828833	0.13547	up	1.4911	0.047419	16	133	1193	23	0	18	0.083759	0.433014	3.95652	0.088404	0	0.053853
ENSRNOG00000059929	AABR07065774.1	-5.92147	0.000840673	0.135959	down	3.01519	188.709	24	89	0	256	32	8301	2.83254	6.21303	0	21.5951	2.35766	542.176
ENSRNOG00000060831	Clca1	2.8018	0.000990698	0.158553	up	1064.94	152.636	24322	245668	175116	10832	8476	47925	282.175	1688.92	1223.73	89.4103	62.5012	305.997
ENSRNOG00000007886	Orm1	-5.37404	0.00102038	0.16162	down	0.95067	43.4725	0	116	0	3876	145	528	0	2.85201	0	114.545	3.8076	12.0652
ENSRNOG00000037097	Wfdc18	-4.51394	0.00106842	0.164669	down	0.379646	10.8586	0	20	0	350	71	82	0	1.13894	0	23.9388	4.3089	4.32796
ENSRNOG00000029582	Lrch2	2.26421	0.00107054	0.164669	up	0.460604	0.0166973	9	44	70	4	0	0	0.147626	0.472184	0.762003	0.050092	0	0
ENSRNOG00000016977	Calb2	2.12353	0.00107179	0.164669	up	21.4387	4.84281	841	654	1727	186	382	251	23.8388	10.9872	29.49	3.74399	6.87158	3.91287
ENSRNOG00000057376	AABR07051548.2	-3.5229	0.00111088	0.168986	down	57.9137	666.75	126	256	1461	1471	1212	20890	18.7908	22.7512	132.199	157.212	115.706	1727.33
ENSRNOG00000054433	LOC103694853	-4.35641	0.00129718	0.195391	down	1.1552	25.6114	13	23	21	1093	67	24	1.10893	1.23948	1.1172	71.761	3.89624	1.17693
ENSRNOG00000059479	Adcy1	2.68182	0.00136894	0.204197	up	2.79915	0.351816	60	258	781	33	52	55	0.732663	1.88034	5.78445	0.280804	0.40558	0.369065
ENSRNOG00000013973	Lcn2	-3.66764	0.00156286	0.230882	down	64.1755	816.699	658	5523	183	55062	4741	16751	31.334	155.964	5.22835	1867.14	143.595	439.362
ENSRNOG00000051158	Cfb	-3.84577	0.0016552	0.241737	down	5.68607	83.0908	0	1005	719	7147	5137	12132	0	9.87879	7.17941	84.3503	54.1646	110.757
ENSRNOG00000032187	Retnlb	6.54131	0.00166822	0.241737	up	205.602	2.10854	0	11684	880	12	0	124	0	572.942	43.8631	0.697131	0	5.6285
ENSRNOG00000036827	Ppp1r1a	2.28041	0.00168353	0.241737	up	10.6037	2.10324	765	295	372	98	111	166	20.9148	4.77713	6.11915	1.89531	1.92434	2.49006
ENSRNOG00000049096	Mcpt8l2	2.40173	0.00169956	0.241778	up	16.2833	3.00032	553	514	278	35	87	199	26.3676	14.5105	7.97167	1.18593	2.61401	5.20103
ENSRNOG00000019120	Hmgcs2	2.77613	0.00172641	0.243345	up	667.193	97.3133	59913	10931	47581	3370	14767	3780	1261.66	136.403	603.517	50.4843	197.655	43.8008
ENSRNOG00000050658	Tacr2	1.77536	0.00183494	0.254863	up	21.1907	6.11947	1076	2300	3372	405	693	1022	15.3034	19.3833	28.8854	4.09451	6.26435	7.99955
ENSRNOG00000009050	Amn	2.79428	0.00184843	0.254863	up	11.2311	1.53347	734	110	997	34	205	69	17.6758	1.55827	14.4592	0.571527	3.12498	0.903909
ENSRNOG00000050143	AABR07065815.2	-3.39381	0.00186532	0.254863	down	7.07735	75.3404	45	122	139	95	294	3417	4.74538	7.62161	8.86505	7.09842	19.7536	199.169
ENSRNOG00000014964	Hp	-3.80162	0.00187448	0.254863	down	3.7689	53.8498	8	472	46	5221	87	1327	0.286771	10.0323	0.987666	133.365	1.97826	26.2065
ENSRNOG00000042292	AABR07004993.1	2.92994	0.00193291	0.260502	up	7.45776	0.891728	197	273	399	3	73	44	7.34056	6.04591	8.98681	0.063148	1.71657	0.895468
ENSRNOG00000021079	Fxyd1	2.28705	0.00195411	0.260993	up	136.407	27.8696	3869	1099	1043	403	727	552	307.547	51.7626	49.9119	22.7652	36.6994	24.1443
ENSRNOG00000046366	Dmd	1.88441	0.00197053	0.260993	up	2.50087	0.604457	480	1011	2317	161	307	527	1.45667	1.81489	4.23106	0.346329	0.588682	0.878359
ENSRNOG00000053633	LOC103690354	-5.06758	0.00199256	0.261655	down	2.34001	81.7245	0	127	2	1394	12	3012	0	6.93402	0.085996	91.5024	0.666645	153.004
ENSRNOG00000031004	Cyp2j4	2.31099	0.0020154	0.262411	up	20.7545	4.10264	2026	604	760	172	520	199	44.3895	7.84197	10.0322	2.67024	7.24002	2.39766
ENSRNOG00000013552	Scd	3.13705	0.00204498	0.263931	up	38.187	4.25216	11143	927	679	468	294	1506	105.494	5.20031	3.86691	3.14655	1.76415	7.84579
ENSRNOG00000014387	Chac1	-3.04437	0.00206569	0.263931	down	0.710878	6.58964	10	35	81	123	118	1036	0.26788	0.548543	1.31621	2.35559	2.0192	15.3941
ENSRNOG00000047218	Clic5	2.06084	0.00207861	0.263931	up	7.01098	1.60433	369	1050	2301	146	253	509	3.26003	5.50714	12.2658	0.918511	1.41885	2.47564
ENSRNOG00000014107	Omg	2.47454	0.00211314	0.265193	up	0.564373	0.0195363	32	13	59	0	5	0	0.714609	0.163919	0.81459	0	0.058609	0
ENSRNOG00000022009	Mzb1	-2.66955	0.00212306	0.265193	down	14.9417	95.5997	203	619	675	810	954	9193	9.3133	16.8458	18.6659	26.4816	27.8421	232.475
ENSRNOG00000042889	Alpg	3.40212	0.00221075	0.273919	up	3.24065	0.216004	25	242	223	0	15	20	0.796012	4.61198	4.31396	0	0.297432	0.350579
ENSRNOG00000025539	Vps13a	2.08329	0.00241504	0.295915	up	2.91925	0.612472	460	316	1331	72	174	259	2.77764	1.13177	4.84834	0.308878	0.66781	0.860729
ENSRNOG00000013535	Cdh6	2.03992	0.00242679	0.295915	up	0.432319	0.029448	20	52	39	5	0	4	0.3468	0.540342	0.409815	0.050794	0	0.03755
ENSRNOG00000016463	Prl2a1	5.27881	0.00247035	0.298854	up	15.8555	0.31099	1004	0	67	0	26	8	45.748	0	1.81859	0	0.732838	0.200131
ENSRNOG00000029128	Cyp2d5	2.32564	0.00251557	0.301947	up	9.66836	1.84866	561	142	737	77	148	110	14.9433	2.23406	11.8277	1.44971	2.49611	1.60015
ENSRNOG00000007980	Anxa13	2.71664	0.0025414	0.302683	up	14.7081	2.15273	116	2080	543	178	46	164	3.04104	32.4676	8.61561	3.32833	0.759685	2.37018
ENSRNOG00000017381	Itih4	-2.84016	0.0025807	0.304999	down	0.0383493	0.890721	0	8	6	231	4	46	0	0.065073	0.049975	2.28852	0.035434	0.348207
ENSRNOG00000024272	Ino80d	2.60344	0.00263945	0.308024	up	1.51886	0.166378	72	106	400	4	40	24	0.871136	0.756928	2.92852	0.034601	0.305578	0.158954
ENSRNOG00000031669	Lpp	2.29927	0.00264639	0.308024	up	4.97193	0.930441	193	245	733	62	106	64	3.68026	2.78044	8.4551	0.833517	1.28455	0.673256
ENSRNOG00000058006	Sncg	2.17183	0.00267786	0.309343	up	90.5176	20.0107	3630	1510	685	579	568	583	199.666	49.1943	22.6927	22.6011	19.8144	17.6167
ENSRNOG00000017646	RGD1309651	2.61514	0.00290868	0.333499	up	11.902	1.85892	130	114	145	21	28	22	16.3005	8.46759	10.938	1.85662	2.21002	1.51012
ENSRNOG00000006738	Fbxo32	2.20521	0.00301775	0.343442	up	17.7209	3.76451	283	1567	4613	328	359	703	3.76229	12.3683	37.0321	3.1023	3.04005	5.15118
ENSRNOG00000024620	Mamdc2	2.56899	0.00309889	0.350083	up	8.00216	1.26539	60	645	1135	101	104	75	1.27686	8.15247	14.5772	1.51891	1.39989	0.877363
ENSRNOG00000046222	LOC103689942	-4.41732	0.00313853	0.351974	down	0.639201	15.6946	0	0	55	850	36	337	0	0	1.9176	35.0242	1.31546	10.7441
ENSRNOG00000005957	Slc4a7	2.24728	0.00329234	0.366547	up	4.54068	0.877421	185	486	1441	52	139	245	1.86767	2.9222	8.83218	0.371036	0.894106	1.36712
ENSRNOG00000020945	Ms4a1	-3.36476	0.00331694	0.366629	down	0.604156	7.15375	0	45	44	83	122	888	0	0.901293	0.911175	2.01758	2.65284	16.7908
ENSRNOG00000058891	Cys1	2.02564	0.00334592	0.367191	up	4.01364	0.910298	289	379	547	47	100	173	4.12964	3.20821	4.70308	0.474759	0.901322	1.35481
ENSRNOG00000021174	Macrod1	2.24947	0.00339658	0.370107	up	43.8389	9.14042	3102	385	1166	251	675	425	101.204	7.41407	22.899	5.8103	13.9879	7.62308
ENSRNOG00000019584	Dlk1	-3.66776	0.00366693	0.395248	down	1.45643	19.6804	12	244	16	2415	18	932	0.31619	3.79917	0.253937	45.2473	0.279813	13.514
ENSRNOG00000029830	Adm2	-2.69157	0.00370426	0.395248	down	0.0657287	0.970635	0	5	5	16	51	50	0	0.097787	0.099399	0.468093	1.33036	1.11345
ENSRNOG00000051653	AABR07065772.2	-3.03371	0.00370448	0.395248	down	12.2233	100.818	12	168	322	231	266	3949	1.37288	11.9507	23.3464	19.8238	20.3461	262.283
ENSRNOG00000010478	LOC500712	-2.40212	0.0037697	0.396893	down	3.2162	17.4288	54	2275	330	5717	3717	4066	0.320845	8.13174	1.19602	24.5342	14.2546	13.4976
ENSRNOG00000016690	Idi1	-2.10168	0.0037745	0.396893	down	5.53421	24.0826	86	1146	560	763	4064	3031	1.29424	10.2296	5.07878	8.18004	38.9327	25.135
ENSRNOG00000029945	Cuzd1	-5.24674	0.0037974	0.396893	down	0.161043	9.81147	0	40	0	350	0	2171	0	0.483128	0	5.07388	0	24.3605
ENSRNOG00000037782	Gkn3	3.40083	0.0039215	0.406402	up	97.684	9.15794	3511	73	681	8	419	182	259.569	3.18617	30.2968	0.412471	19.6656	7.39573
ENSRNOG00000009373	RGD1562690	-1.83939	0.00394129	0.406402	down	12.7144	45.7574	131	742	542	1641	2032	1398	5.57172	18.698	13.8735	49.6418	54.9207	32.7097
ENSRNOG00000009329	Nr1d1	1.75784	0.00406851	0.414054	up	40.8388	12.0052	2120	2336	6422	1070	1075	1314	35.2249	23.0044	64.2871	12.6435	11.354	12.0183
ENSRNOG00000029980	Zbtb16	2.26409	0.0040694	0.414054	up	4.13382	0.781399	157	314	708	103	79	40	2.52372	2.99994	6.87779	1.17997	0.81021	0.354019
ENSRNOG00000054957	Sfrp4	-2.70644	0.00425816	0.43041	down	0.748878	5.44071	29	289	74	2065	200	316	0.258284	1.57922	0.409132	13.5536	1.16799	1.60051
ENSRNOG00000040122	Myoz1	2.34596	0.00435398	0.436452	up	0.86726	0.0902564	49	39	13	4	6	3	1.60474	0.757783	0.239257	0.0932645	0.123713	0.0537919
ENSRNOG00000056001	Sftpd	3.01647	0.00437475	0.436452	up	5.77497	0.626038	105	2240	97	54	25	197	1.21742	15.4328	0.674743	0.441239	0.179633	1.25724
ENSRNOG00000013395	Pglyrp1	-3.67468	0.00442674	0.43879	down	4.08042	53.2837	10	385	14	3591	38	1149	0.497878	11.3499	0.393457	127.177	1.19664	31.4775
ENSRNOG00000012404	Thrsp	2.70363	0.00446867	0.440106	up	67.3192	10.2493	5095	711	593	596	58	789	175.219	14.4726	12.2657	14.5687	1.24791	14.9312
ENSRNOG00000004222	S100g	4.48887	0.00455964	0.446206	up	1260.01	56.0208	35425	622	564	121	2365	33	3706	38.5113	35.508	8.98679	157.216	1.8593
ENSRNOG00000027271	RGD1359290	2.18071	0.00475339	0.462222	up	89.6637	19.6989	449	791	5467	475	454	544	28.6322	29.9244	210.435	21.5724	18.414	19.1103
ENSRNOG00000052841	AABR07044388.5	3.13693	0.00484589	0.468253	up	11.1952	1.18405	22	169	356	33	12	10	2.13652	10.0127	21.4364	2.33038	0.703542	0.518234
ENSRNOG00000011151	Tenm4	2.09189	0.00495531	0.47561	up	0.465846	0.0327327	12	144	308	0	8	27	0.057736	0.421054	0.918749	0	0.025054	0.073144
ENSRNOG00000028108	Cytl1	1.90313	0.00498394	0.47561	up	7.33231	1.88712	421	496	413	71	94	252	9.61013	6.70799	5.6788	1.14146	1.35399	3.16591
ENSRNOG00000017193	Lingo1	2.17823	0.00501819	0.475923	up	1.22591	0.192955	82	127	95	19	23	12	1.41059	1.28745	0.979672	0.220835	0.244744	0.113287
ENSRNOG00000027742	Adamtsl2	-1.98789	0.00512044	0.482641	down	1.29256	5.42367	70	229	219	669	568	1046	0.802207	1.55923	1.51625	5.48186	4.15965	6.62952
ENSRNOG00000050912	AABR07065651.4	-3.01379	0.00525528	0.49233	down	9.35706	76.2832	79	85	173	189	252	2912	9.45513	6.07455	12.5415	16.1527	19.2721	193.425
ENSRNOG00000057681	AABR07065772.4	-3.70976	0.00534671	0.49786	down	7.94615	105.178	71	57	145	51	150	4350	8.82069	4.15522	10.8625	4.49867	11.8704	299.164
ENSRNOG00000003515	Ephx1	2.0393	0.00540985	0.500705	up	74.552	18.0615	6645	1414	4424	736	1845	1387	146.456	18.4698	58.7303	11.5381	25.8295	16.817
ENSRNOG00000031211	Acsm5	1.90527	0.00561641	0.515498	up	0.429444	0.0413435	51	69	35	12	0	4	0.57851	0.468598	0.241226	0.0987657	0	0.0252647
ENSRNOG00000001837	Sst	2.06311	0.00563679	0.515498	up	101.236	24.1497	3461	578	983	682	533	409	239.155	23.6406	40.9131	33.5106	23.3932	15.5453
ENSRNOG00000055229	LOC108348118	2.89064	0.00573786	0.521636	up	0.803724	0.0218613	0	121	192	0	8	0	0	0.923057	1.48811	0	0.065584	0
ENSRNOG00000058824	AABR07065789.3	-2.27266	0.00585568	0.529216	down	48.2084	233.332	133	533	958	964	721	6928	18.6576	44.5519	81.4156	96.8563	64.6742	538.466
ENSRNOG00000008479	Slc8a1	1.79241	0.00594519	0.534163	up	7.19244	2.00525	334	676	1340	210	172	312	4.66243	5.60548	11.3094	2.09536	1.5218	2.39858
ENSRNOG00000007664	Tnfrsf13c	-3.37319	0.00601366	0.537173	down	0.145182	2.44051	0	0	30	75	56	387	0	0	0.435546	1.28033	0.864417	5.17678
ENSRNOG00000040215	LOC100910526	-2.53727	0.00608153	0.540096	down	0.0316353	0.664131	0	0	12	4	176	62	0	0	0.0949059	0.0379221	1.50114	0.453329
ENSRNOG00000055721	Rnf128	1.47693	0.00626858	0.550741	up	20.8218	7.41618	1287	3050	2687	571	1041	1111	17.0428	23.9648	21.4577	5.38461	8.76621	8.09773
ENSRNOG00000053449	Cracr2a	2.6677	0.00628862	0.550741	up	5.53973	0.787563	50	75	453	11	32	44	2.25429	1.9924	12.3725	0.349661	0.921357	1.09167
ENSRNOG00000000419	Cfb	2.45421	0.00632605	0.550741	up	2.19227	0.318287	671	48	40	63	47	58	6.11197	0.255037	0.209807	0.402219	0.264666	0.287976
ENSRNOG00000017864	Bdp1	1.89421	0.00634477	0.550741	up	2.41704	0.577135	243	416	1495	114	118	320	1.26151	1.28687	4.70273	0.422293	0.389833	0.91928
ENSRNOG00000023633	Crabp1	2.26478	0.00653755	0.564286	up	10.4106	2.08706	369	72	256	40	88	54	20.3904	2.342	8.49935	1.56529	3.06667	1.62922
ENSRNOG00000004330	Chrdl1	2.10229	0.00667712	0.573113	up	7.42604	1.65272	136	2430	970	185	227	373	1.39747	14.8562	6.02445	1.35749	1.4837	2.11698
ENSRNOG00000024073	Syce1	2.61417	0.00680678	0.580996	up	1.54678	0.168962	45	102	89	0	18	12	1.31712	1.75598	1.56725	0	0.327786	0.1791
ENSRNOG00000010731	Gpm6a	1.82598	0.00692891	0.5858	up	0.516193	0.0737966	20	62	113	8	12	8	0.247719	0.457892	0.842967	0.070953	0.095555	0.0548817
ENSRNOG00000053850	Rdh5	1.98123	0.00693932	0.5858	up	4.76016	1.13095	465	153	372	53	146	101	8.51326	1.658	4.10924	0.683923	1.69465	1.01428
ENSRNOG00000021090	Pygm	1.68774	0.00698467	0.586407	up	6.26079	1.87446	369	634	886	184	154	280	5.41744	5.51956	7.84537	1.92149	1.43605	2.26586
ENSRNOG00000021303	Drc3	2.61083	0.00716861	0.597698	up	12.889	2.02636	1352	54	453	28	297	96	31.5577	0.738969	6.3702	0.459739	4.39455	1.2248
ENSRNOG00000031136	Ntng1	2.06632	0.00719696	0.597698	up	3.66654	0.799326	87	894	720	137	106	117	0.90692	5.55059	4.5421	1.01986	0.705266	0.672855
ENSRNOG00000046834	C3	-3.23904	0.00737282	0.60834	down	10.0637	95.8619	62	5778	352	37779	1420	13506	0.501714	27.9598	1.72952	219.516	7.36812	60.7016
ENSRNOG00000023068	Cd5l	-2.61735	0.0074043	0.60834	down	0.217011	1.84525	5	12	32	231	29	136	0.086248	0.152643	0.412141	3.54288	0.388496	1.60437
ENSRNOG00000051285	AABR07070312.1	2.36441	0.0074518	0.608987	up	1.8437	0.27746	34	94	167	5	20	24	0.991542	1.61506	2.9245	0.083162	0.367981	0.381236
ENSRNOG00000019661	Gdf15	-2.30106	0.00758359	0.610936	down	13.3554	66.2109	206	729	375	4448	425	1528	9.53312	20.0554	10.4777	147.028	12.5444	39.0607
ENSRNOG00000046912	Nr1d2	1.63679	0.00771129	0.610936	up	12.4825	3.94615	697	1584	4053	584	739	735	6.3964	8.61916	22.4318	3.81102	4.3133	3.71414
ENSRNOG00000012674	Adrb3	1.8481	0.0077159	0.610936	up	4.31509	1.12632	268	262	398	53	105	127	5.23866	3.02626	4.68033	0.725252	1.29387	1.35984
ENSRNOG00000003209	Pcp4l1	1.83083	0.00772676	0.610936	up	6.96916	1.88716	211	487	430	81	107	147	5.81807	7.95247	7.13694	1.58058	1.85943	2.22148
ENSRNOG00000031792	Mcpt1l4	2.85155	0.00775322	0.610936	up	3.75642	0.434296	191	90	69	0	33	23	7.55026	2.08895	1.63003	0	0.809967	0.49292
ENSRNOG00000027191	Birc6	1.69318	0.00777266	0.610936	up	4.28923	1.25735	454	1711	3661	324	575	877	1.58951	3.5515	7.7267	0.806444	1.2768	1.68879
ENSRNOG00000014867	Synpo2	2.15081	0.00777667	0.610936	up	35.7441	7.97161	544	4755	11845	841	1474	1465	5.55676	28.7825	72.893	6.10939	9.56818	8.23726
ENSRNOG00000011044	Clmn	1.65773	0.00784058	0.610936	up	6.99716	2.14936	482	867	2216	221	382	576	4.33778	4.62614	12.0276	1.41057	2.18286	2.85466
ENSRNOG00000003094	Cmahp	2.60798	0.00786225	0.610936	up	16.3521	2.59861	469	194	3313	42	79	601	8.92001	2.18417	37.9521	0.567819	0.944242	6.28376
ENSRNOG00000013605	AC120568.1	2.48526	0.00788995	0.610936	up	11.355	1.94578	248	73	723	13	109	85	11.6227	2.01262	20.4298	0.401949	3.25376	2.18162
ENSRNOG00000051731	AABR07059004.1	2.723	0.00791307	0.610936	up	1.05581	0.0750577	26	45	88	0	12	0	0.760732	0.80916	1.59753	0	0.225173	0
ENSRNOG00000004473	Ppargc1a	2.05794	0.00803955	0.617598	up	4.34715	0.96802	217	244	801	31	150	130	3.34376	2.23274	7.46494	0.332045	1.46837	1.10364
ENSRNOG00000016208	Setbp1	2.17261	0.00817414	0.624814	up	1.67609	0.293951	86	98	551	18	68	50	0.904165	0.611367	3.51273	0.135222	0.45654	0.290091
ENSRNOG00000017833	Actn2	2.51515	0.00827025	0.628994	up	2.50045	0.354899	248	33	432	12	92	15	3.52373	0.277408	3.70022	0.12134	0.826844	0.116512
ENSRNOG00000011387	Tet3	1.79367	0.00833501	0.628994	up	3.34507	0.893685	255	513	1461	120	177	340	1.77812	2.11923	6.13786	0.593013	0.783775	1.30427
ENSRNOG00000046284	AABR07027451.1	-2.03209	0.00835165	0.628994	down	20.1469	82.7091	29	426	259	690	480	1812	3.9951	34.8958	21.5497	67.8853	42.1687	138.073
ENSRNOG00000030478	AY172581.9	2.61806	0.00849613	0.636754	up	5343.39	870.285	334723	20705	25668	17016	58397	17824	14803.8	542.621	683.77	535.429	1641.61	433.819
ENSRNOG00000036362	AC111734.1	3.10091	0.00862101	0.642826	up	64.3937	7.41711	464	23	11	45	18	23	185.382	5.2245	2.57474	12.7778	4.56573	4.90783
ENSRNOG00000008161	Pdzk1ip1	1.51672	0.00866083	0.642826	up	36.4422	12.6707	823	993	935	228	415	474	45.5673	32.5834	31.1758	8.96837	14.6059	14.4378
ENSRNOG00000010938	Slc7a10	2.30319	0.00874826	0.642974	up	1.73149	0.271086	137	116	43	11	5	47	3.0733	1.54668	0.574499	0.174338	0.057391	0.581529
ENSRNOG00000017684	Fbxl22	1.58359	0.00876915	0.642974	up	12.5255	4.11249	2332	1568	1154	299	1012	806	22.1521	8.82606	6.59831	2.01894	6.1054	4.21313
ENSRNOG00000015438	Ces1f	2.03074	0.00885448	0.642974	up	2.49808	0.535826	676	86	709	208	89	82	4.38962	0.328678	2.77593	0.954462	0.36054	0.292477
ENSRNOG00000008450	LOC100359539	-2.11313	0.00885761	0.642974	down	4.45773	19.618	14	1007	313	1257	2264	2148	0.234009	9.98638	3.1528	14.9678	24.0962	19.7899
ENSRNOG00000048764	AABR07051675.1	-3.80381	0.00887207	0.642974	down	0.416846	7.11811	0	18	0	13	38	271	0	1.25054	0	1.02032	2.78556	17.5484
ENSRNOG00000031848	AABR07065651.1	-3.09563	0.00899383	0.648738	down	5.35619	46.5411	44	28	124	47	293	1721	5.175	1.96822	8.92535	3.97369	22.2878	113.362
ENSRNOG00000033209	Bmp8b	2.27171	0.00909825	0.653203	up	9.42435	1.87234	376	67	641	26	145	89	13.2728	1.38153	13.6187	0.648467	3.25157	1.71698
ENSRNOG00000047503	Apoc3	3.01953	0.00932183	0.666142	up	9.56154	1.09145	409	9	47	52	11	13	26.5754	0.311618	1.79765	2.4012	0.44843	0.424725
ENSRNOG00000020308	Ech1	1.74936	0.00945056	0.672215	up	334.953	99.5557	15955	6745	13103	3595	5751	3750	575.809	144.231	284.819	92.2976	131.902	74.4675
ENSRNOG00000011500	Pou2af1	-2.39896	0.00951463	0.673653	down	2.97295	16.1074	24	215	634	326	572	4156	0.395694	2.12731	6.39586	3.87817	6.09547	38.3487
ENSRNOG00000000837	Tnf	-2.53347	0.00960953	0.675963	down	0.856681	5.43884	16	112	35	596	54	350	0.37924	1.66506	0.525744	10.6412	0.850223	4.82513
ENSRNOG00000007706	Prkaa2	2.43011	0.00963925	0.675963	up	3.49341	0.566761	69	99	879	22	62	96	1.09557	0.930103	8.45456	0.242525	0.620325	0.837432
ENSRNOG00000022176	Gpr75	2.07014	0.00967924	0.675963	up	0.730303	0.097725	28	52	127	7	2	23	0.454322	0.498033	1.23855	0.077926	0.015959	0.19929
ENSRNOG00000037495	AABR07065883.1	-3.30554	0.00989789	0.687055	down	7.79456	77.9538	29	61	215	136	24	3319	3.44749	4.31276	15.6234	11.6153	1.81788	220.428
ENSRNOG00000058562	AABR07065651.8	-3.11245	0.0099275	0.687055	down	3.1881	28.3371	18	21	62	47	74	928	2.4829	1.75501	5.32637	4.76542	6.69582	73.5499
ENSRNOG00000020420	Pklr	1.69992	0.0100094	0.689475	up	9.47671	2.84774	1327	547	2950	244	825	604	11.0075	2.68557	14.7371	1.43858	4.34901	2.75564
ENSRNOG00000037814	Cxcl17	-2.55568	0.0100766	0.689475	down	0.0760297	0.934957	0	5	3	33	3	51	0	0.14768	0.080409	1.23871	0.08828	1.47788
ENSRNOG00000052017	Dio3	-3.01817	0.0100971	0.689475	down	0.267368	2.87619	8	42	4	424	13	128	0.181529	0.565905	0.054671	6.86013	0.173653	1.59479
ENSRNOG00000015365	Col4a3	1.55426	0.0101569	0.690487	up	0.320203	0.0430803	14	42	188	12	8	13	0.085427	0.157582	0.7176	0.053798	0.030522	0.044921
ENSRNOG00000014714	Trpv6	2.7029	0.0102121	0.691183	up	31.3243	4.72626	5211	576	1510	45	1397	102	75.7915	4.95668	13.2247	0.462172	12.9062	0.810353
ENSRNOG00000002595	Dpp10	2.1886	0.0102738	0.69231	up	3.13089	0.60874	40	273	407	31	53	57	0.824337	3.40146	5.16687	0.460026	0.70896	0.657235
ENSRNOG00000005918	RGD1563941	1.86828	0.0103838	0.69572	up	34.4869	9.37333	3023	494	679	432	783	378	83.9704	8.12982	11.3606	8.52343	13.8229	5.77369
ENSRNOG00000050015	LOC687508	2.10627	0.0104579	0.69572	up	9.58319	2.14889	752	120	318	23	136	228	21.322	2.00563	5.42197	0.456332	2.4364	3.55395
ENSRNOG00000005533	LOC686013	2.0101	0.0104984	0.69572	up	2.71506	0.598852	165	89	107	30	36	34	4.76465	1.5253	1.85522	0.604099	0.662486	0.529972
ENSRNOG00000007290	Atp1a2	1.60175	0.0105421	0.69572	up	6.55574	2.09291	590	1082	1909	559	190	440	4.87182	5.2951	9.5003	3.28328	0.995934	1.99952
ENSRNOG00000010708	Gata4	-1.87496	0.0105854	0.69572	down	0.009978	0.303389	0	5	0	51	0	66	0	0.029934	0	0.455622	0	0.454544
ENSRNOG00000028261	Tppp	2.55214	0.0106587	0.69572	up	8.48378	1.36355	26	317	903	38	98	61	0.871394	6.2934	18.2865	0.89808	2.06404	1.12853
ENSRNOG00000004709	Foxn3	1.88789	0.0107016	0.69572	up	4.16446	1.05226	163	390	1204	173	116	158	1.8189	2.57733	8.09714	1.36945	0.818375	0.968972
ENSRNOG00000021017	Car11	1.64163	0.010704	0.69572	up	13.4028	4.22757	708	381	550	206	226	199	22.5065	7.16681	10.5352	4.64304	4.56702	3.47265
ENSRNOG00000020465	Ripk3	-1.72918	0.010732	0.69572	down	12.1433	40.4914	369	1736	539	3067	2952	3056	7.79524	21.7676	6.86714	46.1754	39.7061	35.5926
ENSRNOG00000009907	Mmp8	-3.92527	0.0108218	0.69714	down	2.88391	45.2327	0	826	16	8299	138	3313	0	8.49244	0.159298	102.525	1.52075	31.6518
ENSRNOG00000020136	Tgm1	-3.17774	0.0108558	0.69714	down	3.76409	34.8657	28	1434	39	10102	222	1834	0.349294	10.6548	0.288164	90.1746	1.7632	12.6592
ENSRNOG00000058422	Pirb	-2.37195	0.01089	0.69714	down	4.38189	23.1	384	258	406	3382	726	2263	6.45781	2.56691	4.12095	40.5466	7.77067	20.9828
ENSRNOG00000014443	Pde5a	1.8541	0.0109443	0.697708	up	14.0609	3.81698	259	1488	3723	263	575	666	3.22134	10.9936	27.9677	2.32721	4.55738	4.56636
ENSRNOG00000004147	Abca8a	1.73476	0.0111152	0.70023	up	5.8106	1.67589	283	944	2494	195	401	513	2.09996	4.1599	11.1719	1.03181	1.89578	2.10008
ENSRNOG00000057228	Ccdc92b	2.14959	0.0111222	0.70023	up	1.16729	0.185617	41	25	90	4	8	18	1.31973	0.439747	1.74239	0.0919791	0.159954	0.304919
ENSRNOG00000016837	Ckm	1.92188	0.0111848	0.70023	up	17.1001	4.43928	1108	303	755	43	412	291	32.6245	5.28793	13.3878	0.892515	7.71113	4.71419
ENSRNOG00000011000	Rims1	2.31248	0.0111949	0.70023	up	1.74343	0.271107	24	301	869	23	42	127	0.169548	1.28596	3.77478	0.116765	0.192422	0.504135
ENSRNOG00000053400	Cfi	-3.2236	0.0112117	0.70023	down	0.485751	5.3716	4	96	20	988	4	164	0.07916	1.14132	0.236777	14.2414	0.05083	1.82254
ENSRNOG00000059007	AABR07061005.2	-3.22049	0.0113055	0.703229	down	10.4074	97.8396	39	36	364	188	54	4455	4.33603	2.36058	24.5255	14.9506	3.80227	274.766
ENSRNOG00000027697	Nmnat2	2.50377	0.0114077	0.703232	up	0.663431	0.0346042	0	51	74	3	0	4	0	0.802454	1.18784	0.0479132	0	0.0558994
ENSRNOG00000017619	Aldh1a1	2.08251	0.0114254	0.703232	up	32.7346	7.65233	1582	426	5442	1059	486	243	30.3879	4.83995	62.9759	14.4697	5.9258	2.56149
ENSRNOG00000051770	Cyp2w1	3.81001	0.0114429	0.703232	up	4.54806	0.231393	22	69	691	0	0	45	0.611752	1.15725	11.8752	0	0	0.694179
ENSRNOG00000030724	Adamdec1	2.04491	0.0114987	0.703849	up	175.165	42.3735	12721	5251	23012	670	7034	4062	225.126	55.0641	245.306	8.43379	79.1232	39.5634
ENSRNOG00000051179	Vps25	1.9492	0.0116392	0.709624	up	15.9855	4.06549	2123	299	547	131	651	298	38.7632	3.20085	5.99238	1.67464	7.5507	2.97114
ENSRNOG00000054493	Rpph1	2.27761	0.0117892	0.714943	up	74.1775	15.2189	1430	132	96	167	237	96	203.306	11.0667	8.15978	16.836	21.3662	7.45445
ENSRNOG00000017539	Mmp9	-3.60233	0.0118196	0.714943	down	2.92429	36.6311	6	1083	8	8711	128	3437	0.0803457	8.62901	0.0635178	83.3617	1.09068	25.4407
ENSRNOG00000010079	Car3	1.86117	0.0118683	0.715074	up	159.557	43.8462	11181	6247	5041	4553	1132	1755	298.677	98.8803	81.1142	86.5397	19.2057	25.7932
ENSRNOG00000033220	Oas1k	-2.20485	0.0119273	0.715827	down	1.86876	8.97653	75	933	100	3290	521	1133	0.607636	4.5127	0.485948	19.1394	2.69955	5.09068
ENSRNOG00000013380	Rhov	-1.94027	0.012073	0.718083	down	2.99411	11.7745	66	280	231	1279	465	455	1.59092	4.02324	3.36817	22.0777	7.1706	6.07514
ENSRNOG00000057963	AABR07060944.1	-4.94537	0.0120798	0.718083	down	0.805662	27.8044	0	0	35	94	0	1167	0	0	2.41699	7.82559	0	75.5875
ENSRNOG00000024115	C6	-2.00966	0.0121051	0.718083	down	3.21365	13.2436	146	620	284	2586	371	1344	2.04818	5.18098	2.41179	25.9676	3.32471	10.4386
ENSRNOG00000060103	Bex4	2.36458	0.0122391	0.723237	up	3.53551	0.605922	49	26	43	4	7	16	5.76477	1.80976	3.03199	0.326513	0.456639	1.03461
ENSRNOG00000030449	Gsta4	1.56652	0.0123224	0.724652	up	30.7902	10.3292	1419	403	907	276	430	491	59.4744	9.99088	22.9055	8.21807	11.4563	11.3132
ENSRNOG00000019704	Resp18	1.75862	0.0123578	0.724652	up	16.5785	4.82899	675	193	431	99	220	175	32.0184	5.42068	12.2964	3.34267	6.6123	4.53202
ENSRNOG00000005278	Trhde	1.59736	0.0124045	0.724652	up	0.435468	0.076962	67	31	201	12	26	21	0.424649	0.114839	0.766917	0.053509	0.104798	0.072579
ENSRNOG00000057526	AABR07051642.1	-2.67145	0.0126016	0.73294	down	19.6382	125.646	85	121	770	525	199	6287	8.03718	6.77115	44.1062	35.5106	11.9891	329.437
ENSRNOG00000050040	Akr1c13	1.63159	0.0126803	0.73294	up	41.2024	13.2296	1269	1884	1947	118	1001	768	44.0781	38.7871	40.7421	2.90333	22.1029	14.6827
ENSRNOG00000060408	AABR07051716.1	-2.79165	0.0127299	0.73294	down	23.4165	162.734	110	177	479	180	221	5857	15.363	14.6056	40.281	17.8675	19.612	450.721
ENSRNOG00000023824	RGD1561648	1.8404	0.0127372	0.73294	up	0.436772	0.0498908	40	8	89	0	8	11	0.525837	0.0646137	0.719864	0	0.0696559	0.0800163
ENSRNOG00000006569	Itgb8	2.15623	0.0129262	0.736853	up	1.29025	0.21189	33	79	401	16	30	42	0.39192	0.561284	2.91755	0.131562	0.226712	0.277397
ENSRNOG00000046560	AC109096.1	1.68275	0.0129339	0.736853	up	135.521	42.1443	1835	634	441	503	260	450	301.311	61.6513	43.6002	58.7671	27.0587	40.607
ENSRNOG00000019495	Gbx2	-3.05273	0.0129491	0.736853	down	0.238946	2.71251	0	30	0	181	43	84	0	0.716837	0	5.18618	1.08443	1.86692
ENSRNOG00000012686	Pomc	2.08492	0.0130526	0.740001	up	7.48159	1.68705	495	74	90	44	102	69	18.7528	1.65671	2.03526	1.18282	2.44955	1.42878
ENSRNOG00000047541	AABR07051715.1	-3.86521	0.0131753	0.740338	down	0.246138	4.94423	2	5	2	43	0	140	0.268571	0.329271	0.140573	4.1895	0	10.6432
ENSRNOG00000048458	AABR07065705.1	-3.03055	0.0133498	0.740338	down	1.83171	15.6844	6	12	64	55	31	678	0.572731	0.740752	4.18165	4.19016	2.0648	40.7984
ENSRNOG00000033748	AABR07060610.1	1.4087	0.0133892	0.740338	up	114.622	43.11	2468	1419	1124	646	812	951	212.924	72.5487	58.3931	39.6593	44.5316	45.1392
ENSRNOG00000008652	Phip	1.74581	0.0133998	0.740338	up	1.7385	0.44818	181	171	611	76	114	76	1.45153	0.809988	2.95398	0.430174	0.580595	0.333771
ENSRNOG00000015519	Ces1d	1.76049	0.0134039	0.740338	up	16.5675	4.81938	1758	1002	438	544	102	566	33.4214	11.2745	5.00652	7.34121	1.20566	5.91128
ENSRNOG00000042679	AABR07006860.1	1.62966	0.0134492	0.740338	up	0.877363	0.215849	129	182	509	75	81	53	0.618162	0.521298	1.49263	0.257749	0.249033	0.140764
ENSRNOG00000018570	C1qtnf3	1.76235	0.0135334	0.740338	up	9.46992	2.72089	188	963	880	216	216	145	4.1354	12.5864	11.688	3.38426	3.02458	1.75384
ENSRNOG00000009550	Sqle	-1.64624	0.0135448	0.740338	down	10.6154	33.4408	397	1758	1014	1760	4687	4042	6.1689	16.1854	9.49185	19.4574	46.2957	34.5694
ENSRNOG00000016945	Pla2g2a	-1.95558	0.013554	0.740338	down	261.637	1015.1	3404	16289	4437	25476	22801	51610	169.863	481.677	133.371	904.577	723.251	1417.48
ENSRNOG00000028259	Mcemp1	-1.95302	0.0135805	0.740338	down	8.65611	33.8024	166	1242	384	4335	663	1661	3.788	16.8758	5.30451	70.781	9.65632	20.9698
ENSRNOG00000015133	Kmt2a	1.80115	0.0136752	0.740338	up	2.50024	0.646129	157	850	2294	203	189	479	0.57652	1.84922	5.07498	0.530564	0.439581	0.968242
ENSRNOG00000020386	Ash1l	1.60351	0.0136997	0.740338	up	6.55171	2.08892	627	2077	5907	634	716	1492	2.27317	4.46701	12.9149	1.63596	1.65155	2.97925
ENSRNOG00000016374	Fgfr2	1.42065	0.0137646	0.740338	up	19.4753	7.2122	1392	4240	4451	814	1549	1593	12.3386	22.2955	23.7917	5.13512	8.72781	7.77366
ENSRNOG00000055620	AABR07065768.3	-1.84426	0.0138379	0.740338	down	34.7052	124.874	96	416	853	790	791	3658	11.6524	29.9487	62.5145	68.4041	61.1774	245.041
ENSRNOG00000061910	Igfbp3	1.60101	0.0138527	0.740338	up	43.9077	14.407	1147	3514	7063	1475	749	1691	20.1881	36.6506	74.8844	18.47	8.37658	16.3744
ENSRNOG00000037198	Usp18	-2.0205	0.0138729	0.740338	down	2.18226	9.15971	60	268	88	482	955	338	1.43201	3.83231	1.28245	8.29876	14.6841	4.49624
ENSRNOG00000010977	Igfbp6	1.50798	0.0138984	0.740338	up	100.092	35.1278	4084	4040	1825	1268	1303	1689	161.842	94.8644	43.5684	35.7364	32.8189	36.828
ENSRNOG00000017105	Dpyd	1.97459	0.0139259	0.740338	up	5.51657	1.32909	288	368	1988	59	358	258	2.7874	2.11774	11.6446	0.400819	2.20965	1.3768
ENSRNOG00000047943	Alkbh6	1.93234	0.0139986	0.741638	up	38.3695	9.97918	3105	317	1042	128	960	581	91.1785	5.5121	18.418	2.65303	17.9113	9.37319
ENSRNOG00000057092	Slfn4	-1.88486	0.0142584	0.750387	down	4.73141	17.7432	128	2312	447	3034	5683	1546	1.02385	11.0138	2.15661	17.352	29.0402	6.83743
ENSRNOG00000011483	S100a9	-3.47251	0.0142615	0.750387	down	132.922	1476.47	76	8186	73	62136	1208	18572	6.03764	389.215	3.51361	3547.65	61.5923	820.179
ENSRNOG00000030332	Ighg1	-2.794	0.0143676	0.75199	down	27.4785	191.17	537	1192	1107	516	1168	22113	23.1585	30.502	28.7751	15.8517	32.0582	525.601
ENSRNOG00000007034	Hipk2	1.88368	0.0143898	0.75199	up	2.2583	0.53908	162	129	893	81	114	101	1.41167	0.665849	4.69739	0.500966	0.631603	0.484671
ENSRNOG00000060434	AABR07053500.2	2.0978	0.0145462	0.754277	up	629.313	146.939	12012	1188	2193	394	2794	2221	1615.65	94.6731	177.616	37.6254	238.794	164.399
ENSRNOG00000029115	AABR07057190.1	1.36473	0.0145753	0.754277	up	65.0537	25.1996	1919	1261	1067	631	603	816	113.201	44.07	37.8906	26.4858	22.6149	26.498
ENSRNOG00000021670	Frem2	1.65338	0.0146096	0.754277	up	0.458793	0.077637	32	195	285	21	8	63	0.137936	0.497569	0.740874	0.063559	0.021955	0.147397
ENSRNOG00000051619	Asb2	1.37538	0.0146663	0.754277	up	17.0943	6.52756	728	1925	2248	407	756	838	11.5866	18.1486	21.5476	4.60497	7.64354	7.33416
ENSRNOG00000048233	LOC100911489	2.63003	0.0146791	0.754277	up	2.13629	0.261252	78	15	39	4	0	20	4.52018	0.517417	1.37128	0.163448	0	0.620308
ENSRNOG00000061579	AABR07070810.1	1.43986	0.0147908	0.755912	up	63.5971	23.379	1382	797	645	362	469	490	117.579	40.1618	33.0509	21.888	25.3249	22.9241
ENSRNOG00000028335	Fat4	1.86772	0.0148329	0.755912	up	1.07668	0.222418	72	776	1155	82	36	313	0.187349	1.21077	1.83193	0.153546	0.060222	0.453486
ENSRNOG00000006675	Fabp1	3.32591	0.0148601	0.755912	up	1168.8	116.468	36132	61	6729	835	5221	174	3149.91	3.14025	353.349	51.7675	289.289	8.34746
ENSRNOG00000033531	Cacna2d1	1.77331	0.0149364	0.755912	up	5.33581	1.49018	157	706	1599	172	198	333	1.62474	4.35383	10.0289	1.26108	1.30106	1.9084
ENSRNOG00000009153	Cidec	1.47102	0.0149569	0.755912	up	24.3626	8.72434	2685	772	1558	630	949	747	48.0882	8.18643	16.8133	8.01696	10.7999	7.35615
ENSRNOG00000017568	Rit2	1.90431	0.0151612	0.762683	up	1.06536	0.211321	32	105	83	8	12	28	0.71262	1.37619	1.10729	0.123482	0.16981	0.340672
ENSRNOG00000053327	AABR07060953.1	-2.82436	0.0152506	0.762683	down	1.86376	13.8093	0	66	37	52	163	567	0	3.56387	2.02742	3.3453	9.47197	28.6107
ENSRNOG00000043300	Enho	1.70961	0.0152873	0.762683	up	11.44	3.42827	486	256	224	61	172	144	21.5894	6.74791	5.98271	1.91221	4.85204	3.52056
ENSRNOG00000050102	AABR07065699.1	-2.36266	0.0152894	0.762683	down	9.65096	50.0509	35	69	277	75	706	1368	4.14053	4.87608	19.9363	6.37123	53.7068	90.0746
ENSRNOG00000003134	Slc4a4	2.34249	0.0154175	0.765415	up	3.55281	0.620226	160	95	1574	16	116	216	1.45824	0.511708	8.68848	0.102836	0.672116	1.08573
ENSRNOG00000043124	Cckar	-2.46603	0.0155244	0.765415	down	0.121652	1.12467	0	6	16	48	8	147	0	0.094684	0.270273	0.958642	0.140092	2.27529
ENSRNOG00000018082	Slc26a2	1.9137	0.0155271	0.765415	up	11.2295	2.90697	321	488	2786	89	405	494	4.72668	4.2561	24.7058	0.931767	3.78645	4.0027
ENSRNOG00000004841	Akap6	1.63617	0.0155435	0.765415	up	1.39371	0.380543	115	468	796	100	109	179	0.550136	1.32922	2.30178	0.338893	0.330842	0.471893
ENSRNOG00000042319	AABR07065814.2	-2.62229	0.0157469	0.768442	down	9.09137	56.4935	26	70	288	1502	30	729	2.8793	4.68753	19.7073	121.703	2.1419	45.6362
ENSRNOG00000012410	S100a1	1.72233	0.0157752	0.768442	up	31.5946	9.50534	370	298	153	76	93	144	54.887	26.2298	13.6672	8.02629	8.77781	11.7119
ENSRNOG00000062158	AC134224.3	1.8331	0.0157757	0.768442	up	147.234	41.251	5723	807	1736	877	1652	649	348.849	29.1199	63.7335	38.0005	64.0011	21.7514
ENSRNOG00000030177	AABR07060979.1	-3.01347	0.0158161	0.768442	down	2.42611	20.2984	0	99	6	105	149	634	0	6.89044	0.387878	8.74574	11.0954	41.0539
ENSRNOG00000027601	Lhfpl1	3.00599	0.015902	0.768442	up	1.05419	0.043677	0	46	219	0	0	12	0	0.538407	2.62418	0	0	0.131031
ENSRNOG00000060021	Txlnb	-1.73889	0.015905	0.768442	down	0.0548937	0.417001	4	16	4	16	96	88	0.041661	0.097926	0.025094	0.117878	0.634207	0.498918
ENSRNOG00000049991	Mcpt8	2.02612	0.0160099	0.769552	up	3.78973	0.854985	477	248	96	9	100	156	7.97206	2.44219	0.954931	0.098108	1.05004	1.41681
ENSRNOG00000034191	Fmo1	-2.4983	0.0160282	0.769552	down	0.572695	3.70085	12	111	28	664	27	221	0.216757	1.19479	0.306541	8.58831	0.30899	2.20524
ENSRNOG00000014008	Mfsd2a	-2.05666	0.0162962	0.779986	down	1.30793	5.75729	16	267	40	254	534	635	0.315849	3.13279	0.475142	3.59086	6.74344	6.93757
ENSRNOG00000007023	Galm	1.29792	0.0164269	0.782131	up	18.8365	7.60168	1249	1135	1935	618	633	735	22.8675	12.3092	21.3326	8.04298	7.35941	7.40264
ENSRNOG00000020563	Cma1	1.80028	0.0164429	0.782131	up	17.9177	5.0732	315	1369	198	179	138	251	13.5824	35.037	5.13363	5.48429	3.77596	5.95936
ENSRNOG00000053527	AABR07034736.1	-3.30604	0.0165424	0.784435	down	4.92963	49.6455	35	49	64	21	48	1778	5.0129	4.17585	5.60014	2.11707	4.37882	142.441
ENSRNOG00000052549	Chga	2.01762	0.0166253	0.78569	up	79.4893	19.5559	6317	565	6544	332	2464	1462	142.205	7.53509	88.7283	5.30853	35.2472	18.1119
ENSRNOG00000002256	Art3	1.31458	0.0166711	0.78569	up	24.1793	9.66134	1041	1731	2424	561	987	698	21.4044	21.1014	30.0322	8.19945	12.8862	7.89837
ENSRNOG00000061009	AABR07035790.2	2.81107	0.0170231	0.799826	up	1.74461	0.162838	6	63	38	8	0	2	0.452803	2.97769	1.80333	0.411154	0	0.077359
ENSRNOG00000018337	Caly	1.94267	0.0171327	0.802522	up	2.07993	0.467074	140	82	67	28	36	16	3.81872	1.32022	1.10084	0.538788	0.621422	0.241012
ENSRNOG00000048017	AABR07056026.1	-2.65435	0.0171883	0.802678	down	10.0116	63.5588	25	150	218	117	69	2592	3.00884	10.9092	16.1168	10.1681	5.37	175.138
ENSRNOG00000032180	Ccdc15	1.67782	0.0173301	0.805232	up	0.339378	0.0373297	24	8	53	5	6	0	0.404226	0.077737	0.536172	0.048042	0.063947	0
ENSRNOG00000037673	AABR07071891.2	1.66451	0.0173478	0.805232	up	133.455	42.0302	3019	1712	585	1186	429	482	275.608	92.6079	32.1484	77.0226	24.8845	24.1835
ENSRNOG00000005070	Spopl	1.91759	0.0174259	0.806335	up	3.27063	0.792196	76	147	419	44	55	64	1.77453	2.06012	5.97723	0.738285	0.812325	0.825976
ENSRNOG00000048800	AABR07031756.2	2.25097	0.0174765	0.806335	up	7.52618	1.50213	60	293	710	50	16	157	2.03355	5.92492	14.6201	1.21233	0.342846	2.95121
ENSRNOG00000032669	Serpina1	-2.30975	0.0175381	0.806753	down	0.237641	1.57402	4	17	26	195	17	87	0.0962393	0.240661	0.376024	3.32264	0.253249	1.14617
ENSRNOG00000058260	Gpbar1	-2.45163	0.0177344	0.80984	down	0.330795	2.2566	0	25	15	143	39	60	0	0.626806	0.365579	4.34227	1.03691	1.39062
ENSRNOG00000043155	AABR07051533.2	-2.69243	0.0177532	0.80984	down	43.4339	281.304	276	266	1074	118	1588	10718	33.3032	18.9754	78.0231	10.1083	121.796	712.009
ENSRNOG00000052880	Prph	1.37925	0.0177633	0.80984	up	36.3898	13.9273	2320	2541	1149	1180	558	972	56.0553	36.3908	16.7233	20.2871	8.57158	12.9233
ENSRNOG00000002331	Aldh3a1	2.07054	0.0179664	0.816673	up	0.774366	0.108161	42	20	72	0	6	18	1.00354	0.279296	1.04026	0	0.091461	0.233021
ENSRNOG00000009177	Fcer1a	2.34788	0.0180721	0.819056	up	2.15395	0.342754	70	84	50	0	20	20	3.02412	2.14595	1.2918	0	0.550925	0.477339
ENSRNOG00000011719	Ngb	1.78615	0.0182484	0.824613	up	1.69267	0.419776	111	209	85	37	30	48	1.97036	2.2008	0.906832	0.45561	0.336762	0.466955
ENSRNOG00000019851	Cox6a2	-2.75717	0.01835	0.826772	down	0.82584	6.15931	14	16	8	66	135	137	1.24878	0.816106	0.41263	4.15065	7.61693	6.71035
ENSRNOG00000017974	Gprin1	2.10907	0.018582	0.834777	up	4.29108	0.917838	81	148	1105	84	116	84	1.24844	1.34843	10.2764	0.915664	1.1297	0.708151
ENSRNOG00000053812	Selenbp1	1.80118	0.0186855	0.835547	up	394.99	113.268	39026	7636	21072	2393	14893	9013	822.227	95.3314	267.413	35.8708	199.434	104.497
ENSRNOG00000017060	Ryr2	1.54984	0.0187079	0.835547	up	0.312667	0.0409457	4	130	411	12	24	36	0.010714	0.219823	0.707465	0.023719	0.043597	0.055521
ENSRNOG00000000190	AABR07058539.1	1.92608	0.0188486	0.838731	up	5.19619	1.29366	89	358	1081	118	71	197	1.44325	3.46962	10.6757	1.37571	0.735234	1.77002
ENSRNOG00000011341	Rictor	1.82406	0.0189362	0.838731	up	1.51188	0.355237	67	197	672	78	55	88	0.513203	0.899748	3.1227	0.423145	0.269666	0.372901
ENSRNOG00000020531	Fen1	-1.61524	0.0189833	0.838731	down	4.43645	13.798	38	663	418	1050	915	1442	0.74101	7.65706	4.91129	14.5699	11.3448	15.4792
ENSRNOG00000021802	Isg15	-2.47132	0.0190578	0.838731	down	5.6644	31.8666	241	278	204	372	3817	499	7.74387	5.29474	3.95461	8.52597	78.2221	8.85161
ENSRNOG00000012458	Cyp2e1	-3.71063	0.0191262	0.838731	down	0.270471	4.75025	0	57	20	61	0	1346	0	0.60038	0.211032	0.777838	0	13.4729
ENSRNOG00000017286	Ephx2	1.36764	0.0193513	0.838731	up	21.4995	8.27032	1674	659	1945	531	839	608	33.3714	7.7775	23.3497	7.52061	10.6286	6.66174
ENSRNOG00000029745	AABR07002677.1	2.34542	0.0193671	0.838731	up	7.48022	1.39156	128	20	41	4	25	23	17.4686	1.61113	3.36095	0.350849	2.09942	1.72442
ENSRNOG00000021243	Siglec1	-2.11349	0.0193715	0.838731	down	1.81019	8.16611	51	1297	172	3853	307	2215	0.292491	4.52989	0.608194	16.1677	1.14467	7.18593
ENSRNOG00000028814	Oasl2	-1.64247	0.0194376	0.838731	down	3.68978	11.7317	98	709	350	733	2097	838	1.48126	6.38696	3.20111	7.92371	20.2615	7.0099
ENSRNOG00000010833	Mthfd2	-1.83262	0.0195881	0.838731	down	4.01622	14.5612	12	653	312	913	1042	1478	0.245596	7.95055	3.8525	13.3529	13.6107	16.7202
ENSRNOG00000011074	Calcb	2.13236	0.0196036	0.838731	up	3.1645	0.64458	80	120	109	44	8	14	3.48714	3.11489	2.89146	1.37231	0.222694	0.33873
ENSRNOG00000000479	Kifc1	-1.49799	0.0196261	0.838731	down	4.50651	12.9111	117	886	487	1006	1789	1491	1.67496	7.60516	4.2394	10.3654	16.4778	11.89
ENSRNOG00000046021	LOC108348172	1.45658	0.0196683	0.838731	up	26.9109	9.74159	1073	811	394	449	243	317	48.3896	21.6589	10.6843	14.413	6.96462	7.84722
ENSRNOG00000043866	AY172581.24	2.00674	0.0197293	0.838731	up	2986.72	743.124	289091	24330	47687	29724	76663	23232	7796.69	388.815	774.661	570.378	1314.17	344.819
ENSRNOG00000017188	Cyp27a1	1.34538	0.0197685	0.838731	up	20.9342	8.17802	1799	948	1684	416	1079	612	33.4738	10.4565	18.8722	5.50649	12.7603	6.26731
ENSRNOG00000001821	Adipoq	1.45454	0.0197801	0.838731	up	41.4322	15.0539	3316	3153	1328	1473	504	1466	68.8746	38.8132	16.6088	21.7692	6.64401	16.7485
ENSRNOG00000013954	Alpl	-2.18674	0.0197933	0.838731	down	6.53461	30.1058	82	1698	66	4616	895	2437	1.41811	17.4972	0.688483	57.116	9.88172	23.3196
ENSRNOG00000047464	AABR07060886.1	-2.83923	0.0198183	0.838731	down	21.8262	156.812	73	151	678	56	282	7049	8.33584	10.2647	46.8781	4.51185	20.506	445.418
ENSRNOG00000013281	Mib1	1.58561	0.0198472	0.838731	up	3.48213	1.0935	254	258	974	128	154	226	2.66843	1.6006	6.17735	0.952015	1.02116	1.30734
ENSRNOG00000025216	LOC108348106	1.63534	0.019871	0.838731	up	55.6216	17.8365	2909	312	952	462	881	523	132.386	8.40723	26.0715	14.9408	25.4804	13.0883
ENSRNOG00000011917	Cd79b	-2.53546	0.0200326	0.842815	down	3.13021	18.6275	113	81	178	263	204	2320	3.95916	1.68266	3.74881	6.55696	4.54521	44.7802
ENSRNOG00000030812	AABR07065781.1	-2.09305	0.0200775	0.842815	down	36.9822	158.111	135	834	957	320	993	7799	12.3805	45.4904	53.0758	20.9249	58.103	395.305
ENSRNOG00000000386	Pbld1	1.4989	0.0202997	0.844991	up	11.5475	4.02115	1009	299	783	235	450	226	21.0902	3.69536	9.8569	3.48637	5.97842	2.59866
ENSRNOG00000007456	Calb1	2.94586	0.0203991	0.844991	up	1.71761	0.135889	28	52	248	0	26	0	0.69514	0.759244	3.69843	0	0.407668	0
ENSRNOG00000019435	Psd	1.25616	0.0204531	0.844991	up	10.7032	4.42284	1266	1526	1440	813	497	657	13.3858	9.55615	9.16767	6.11539	3.33451	3.81863
ENSRNOG00000042041	Gal3st1	1.89577	0.0204764	0.844991	up	11.9956	3.15047	1288	138	462	36	427	248	28.1393	1.77658	6.07105	0.558954	5.91976	2.9727
ENSRNOG00000025130	Ltk	1.77411	0.0205208	0.844991	up	1.02072	0.22767	65	73	90	5	23	33	1.22222	0.816154	1.02378	0.066002	0.27293	0.344078
ENSRNOG00000011747	Tmem205	1.46183	0.0205969	0.844991	up	25.2209	9.09228	1829	542	711	377	702	392	53.6829	9.41615	12.5635	7.86214	13.084	6.33074
ENSRNOG00000007315	Thoc2	1.60202	0.0206458	0.844991	up	3.50244	1.0867	204	469	1304	121	220	304	1.68653	2.30323	6.51756	0.714261	1.15969	1.38613
ENSRNOG00000020874	Ppy	2.35995	0.0206634	0.844991	up	19.7991	3.77631	434	20	371	5	88	126	38.5038	1.04919	19.8445	0.252798	4.94274	6.1334
ENSRNOG00000054508	Foxp2	1.41294	0.0206768	0.844991	up	3.22202	1.14757	294	963	1125	221	251	423	1.83986	3.57888	4.24732	0.982266	1.00014	1.4603
ENSRNOG00000047386	Smg1	1.46803	0.0207753	0.844991	up	4.45473	1.54642	477	1790	4172	491	612	1219	1.57368	3.49728	8.29322	1.14763	1.28106	2.21058
ENSRNOG00000014452	Zfhx3	1.45297	0.020856	0.844991	up	1.3193	0.418424	252	316	1010	102	222	217	0.950722	0.706769	2.3004	0.272607	0.531739	0.450925
ENSRNOG00000020444	Hcn3	1.66273	0.0209165	0.844991	up	3.22255	0.949397	686	188	1107	60	354	300	4.53135	0.734794	4.4015	0.277438	1.48347	1.08729
ENSRNOG00000017306	AABR07071876.1	1.81291	0.0209214	0.844991	up	370.315	105.326	11725	1880	1976	784	3564	2122	928.493	88.2179	94.2336	44.1357	179.372	92.47
ENSRNOG00000059214	AABR07060963.3	-3.86446	0.0210145	0.844991	down	2.39688	36.2677	0	62	41	124	0	1520	0	4.3235	2.86714	10.3661	0	98.437
ENSRNOG00000049033	Racgap1	-2.37704	0.0210553	0.844991	down	1.4564	7.98504	0	314	196	471	1235	988	0	2.67532	1.69389	4.82438	11.3023	7.82848
ENSRNOG00000046313	Basp1	-1.6364	0.0210616	0.844991	down	22.1128	68.9571	96	1803	723	3738	1119	2935	3.95802	44.328	18.0524	110.353	29.5001	67.0182
ENSRNOG00000005365	Kcnip1	2.43928	0.0211251	0.844991	up	1.5837	0.210434	84	52	135	4	37	0	2.04961	0.744252	1.95724	0.0697423	0.561561	0
ENSRNOG00000061699	AABR07061022.3	-2.4775	0.0211434	0.844991	down	7.27649	40.9819	13	43	187	26	770	613	1.81685	3.69935	16.3133	2.66032	71.1855	49.0999
ENSRNOG00000036659	Fn3k	2.04431	0.0211764	0.844991	up	1.96297	0.400144	44	32	53	4	16	12	2.72562	1.18127	1.98202	0.16005	0.634331	0.406052
ENSRNOG00000000428	Cyp21a1	1.59405	0.0212549	0.844991	up	3.46932	1.0823	367	198	137	58	108	121	6.75159	2.14377	1.51262	0.759256	1.26036	1.22729
ENSRNOG00000008658	Mitf	1.58437	0.0212843	0.844991	up	1.99513	0.598662	136	592	410	124	119	104	1.10552	2.86339	2.01649	0.716406	0.615033	0.464548
ENSRNOG00000013658	Nefl	1.55206	0.0214811	0.848936	up	5.95257	1.96406	220	979	1047	243	293	207	2.74504	7.2421	7.87058	2.15403	2.32071	1.41745
ENSRNOG00000001578	Hoxd4	1.8052	0.0214941	0.848936	up	3.91322	1.04835	595	97	158	52	199	68	9.34736	0.903059	1.48925	0.571449	1.98708	0.58652
ENSRNOG00000058340	Krt79	-2.60725	0.0217197	0.853565	down	0.480218	3.43551	28	20	39	53	568	100	0.636947	0.268491	0.535217	0.846926	8.21545	1.24415
ENSRNOG00000009946	Ldlr	-1.59716	0.0217225	0.853565	down	15.4922	47.0738	483	5268	2622	5299	9863	10376	4.32937	27.9875	14.1597	33.8062	56.2107	51.2045
ENSRNOG00000011625	Tnks	1.78441	0.0218809	0.856953	up	3.7646	1.02188	123	471	1359	169	85	287	1.13666	2.58112	7.57604	1.10786	0.497042	1.46072
ENSRNOG00000015658	Sorbs1	1.75723	0.0219202	0.856953	up	9.48541	2.73552	150	1678	3202	381	344	724	1.37937	9.20524	17.8716	2.50191	2.02001	3.68463
ENSRNOG00000018321	Sytl3	1.84842	0.0220595	0.860207	up	1.12218	0.239395	87	83	68	11	4	50	1.65461	0.937077	0.774863	0.146726	0.047649	0.52381
ENSRNOG00000062252	AABR07072853.4	1.49604	0.0221205	0.860402	up	24.2587	8.53579	2003	6116	10476	1396	2778	2620	12.2064	22.0953	38.4744	6.05214	10.7648	8.79044
ENSRNOG00000002460	Serpinb2	-2.37985	0.0223186	0.862018	down	0.127154	1.08229	0	30	0	101	76	57	0	0.381461	0	1.5472	1.02896	0.670729
ENSRNOG00000020628	LOC103690068	1.79798	0.022363	0.862018	up	465.088	133.677	20690	3413	4830	982	6336	4794	1126.74	110.109	158.416	38.0492	219.313	143.67
ENSRNOG00000013057	Prc1	-1.54102	0.0223787	0.862018	down	7.08741	20.8154	160	1717	487	1511	3307	2070	2.30369	14.7172	4.24137	15.5467	30.4146	16.4848
ENSRNOG00000061845	Cttnbp2	1.93552	0.0223864	0.862018	up	1.95671	0.437682	35	553	765	72	58	176	0.246435	2.33756	3.28614	0.364091	0.260821	0.688133
ENSRNOG00000056847	Gsta3	2.14938	0.0225138	0.864755	up	16.5018	3.64219	1128	16	601	61	320	155	37.236	0.313346	11.956	1.41372	6.70311	2.80975
ENSRNOG00000057220	AABR07060792.1	-2.22249	0.0226696	0.866382	down	9.52301	44.8103	30	78	201	52	794	696	4.32113	6.67137	17.5765	5.29163	73.4285	55.7109
ENSRNOG00000003244	Ltc4s	2.09376	0.0226741	0.866382	up	6.47618	1.44059	147	22	121	10	33	44	12.3005	1.06894	6.05907	0.595774	1.7088	2.01721
ENSRNOG00000021525	Nbeal1	1.45727	0.0227253	0.866382	up	1.6246	0.528069	530	196	473	54	218	229	2.77645	0.606035	1.49132	0.200999	0.725298	0.657909
ENSRNOG00000003845	Wnt3	1.67587	0.0236161	0.898113	up	0.632694	0.129316	56	20	108	4	16	26	0.800824	0.169137	0.928121	0.040862	0.141852	0.205234
ENSRNOG00000047314	Tk1	-1.55574	0.0237621	0.901436	down	11.6988	34.5867	342	1956	560	1734	4084	2912	6.51969	22.1368	6.43993	23.5676	49.5785	30.6141
ENSRNOG00000034007	Nr3c2	1.817	0.0238946	0.903835	up	10.7278	2.97303	270	631	2251	58	407	463	4.33818	6.01458	21.8305	0.656776	4.15932	4.103
ENSRNOG00000016998	Atxn1	1.74416	0.023943	0.903835	up	2.33205	0.625986	78	298	760	93	77	139	0.764838	1.7331	4.49821	0.64542	0.480712	0.751827
ENSRNOG00000005348	Pamr1	1.66409	0.0241136	0.908044	up	7.43218	2.27673	146	775	1452	199	296	226	2.20042	6.91596	13.1802	2.13401	2.82866	1.86754
ENSRNOG00000031918	AABR07065789.2	-2.89795	0.0242176	0.908723	down	1.34852	10.6968	0	34	88	101	24	889	0	1.1232	2.92235	4.00204	0.831542	27.2567
ENSRNOG00000014761	Rasd2	1.60682	0.02425	0.908723	up	12.6663	4.09143	329	1815	2823	159	671	843	4.01945	13.1647	20.8147	1.3818	5.21784	5.67465
ENSRNOG00000032596	RT1-T24-1	-2.24683	0.0243458	0.910094	down	0.944667	4.8584	26	26	61	116	161	381	0.929209	0.567003	1.33779	3.05328	3.75973	7.76217
ENSRNOG00000018268	Hhip	2.23093	0.0244259	0.910873	up	2.35693	0.423378	43	145	553	4	64	73	0.65236	1.31341	5.10501	0.039055	0.617865	0.613215
ENSRNOG00000003304	Chad	2.18045	0.0246706	0.917527	up	1.50322	0.253681	12	113	301	12	40	19	0.198594	1.16485	3.14622	0.148399	0.438671	0.173972
ENSRNOG00000006333	AABR07065789.1	-2.68321	0.0247511	0.917527	down	13.9248	89.9791	35	274	244	29	160	3808	4.19149	19.7257	17.8572	2.48908	12.3262	255.122
ENSRNOG00000025164	Bhlha15	-2.01331	0.0248266	0.917527	down	1.12952	4.86368	27	126	301	205	193	1718	0.318783	0.893196	2.17659	1.7533	1.46993	11.3678
ENSRNOG00000018627	Plekhb1	1.45179	0.02492	0.917527	up	6.19905	2.20273	285	430	514	190	106	183	6.24285	5.57596	6.77833	2.95047	1.45934	2.19838
ENSRNOG00000028993	LOC102555453	1.39694	0.0249576	0.917527	up	581.447	220.732	13157	6622	5683	3616	4251	4561	1119.31	333.814	291.216	218.844	229.836	213.517
ENSRNOG00000013982	Hsd17b2	1.85078	0.0249626	0.917527	up	118.054	32.6573	8374	942	2768	251	2913	1641	279.807	18.6484	55.7057	5.95221	61.8562	30.1634
ENSRNOG00000057266	Rnase1	-3.74443	0.0250301	0.917811	down	2.92105	40.3895	0	158	3	771	1	1389	0	8.62896	0.134183	50.5904	0.058281	70.5199
ENSRNOG00000016997	AABR07044442.1	1.80593	0.0251796	0.921094	up	9.10649	2.53303	213	156	1328	86	195	223	5.23256	2.27765	19.8093	1.50249	3.06725	3.02935
ENSRNOG00000023116	Agmo	1.53596	0.0253254	0.923173	up	7.75424	2.60853	251	487	1129	120	305	239	4.77939	5.50299	12.9804	1.62755	3.69501	2.50302
ENSRNOG00000039204	Pram1	-2.24784	0.0253566	0.923173	down	1.75387	8.70533	16	349	45	1283	79	497	0.330816	4.36614	0.56465	19.2907	1.05226	5.77302
ENSRNOG00000011557	S100a8	-3.58022	0.0256957	0.92715	down	43.4866	521.222	0	1936	24	15380	343	5002	0	128.878	1.58224	1229.82	24.4904	309.353
ENSRNOG00000020248	Ina	1.52649	0.0257288	0.92715	up	1.16964	0.340717	93	280	202	52	41	87	0.855216	1.53055	1.12314	0.341258	0.239279	0.441613
ENSRNOG00000019857	Gng7	1.53234	0.0257322	0.92715	up	0.674968	0.167919	52	57	89	10	19	29	0.758748	0.486152	0.780005	0.103192	0.170121	0.230444
ENSRNOG00000008058	Tmprss5	2.20083	0.0257505	0.92715	up	1.34347	0.213974	4	183	188	18	16	24	0.07163	1.93597	2.02282	0.225153	0.181814	0.234954
ENSRNOG00000023148	Col11a1	-2.36462	0.0258419	0.92715	down	0.311298	2.01826	8	237	36	1385	22	178	0.042334	0.774529	0.117032	5.44072	0.074454	0.539599
ENSRNOG00000016543	Trim63	1.77613	0.0258866	0.92715	up	0.929337	0.200532	20	99	78	14	8	22	0.446935	1.30356	1.03752	0.222598	0.112874	0.266123
ENSRNOG00000007112	LOC108348172	1.42069	0.0259098	0.92715	up	26.7033	9.91195	869	701	327	391	204	259	47.0057	22.4661	10.6381	15.0294	7.01496	7.69153
ENSRNOG00000003434	Trove2	1.72818	0.0259486	0.92715	up	1.49561	0.381605	60	169	389	28	50	90	0.683236	1.13749	2.66609	0.22363	0.361297	0.559887
ENSRNOG00000003031	Atp2b4	1.87225	0.0262983	0.937213	up	23.225	6.27113	641	7908	14451	786	1950	3619	3.17704	23.2699	43.2279	2.77396	6.1504	9.88905
ENSRNOG00000053118	LOC103694867	-3.15608	0.0263663	0.937213	down	0.076316	1.47168	8	0	0	48	32	169	0.228948	0	0	1.01893	0.605108	2.79101
ENSRNOG00000008843	Eci1	1.21051	0.0264178	0.937213	up	59.8567	25.8082	2566	1296	1638	880	1051	1034	106.679	31.893	40.9982	26.0129	27.7582	23.6535
ENSRNOG00000014532	Lbp	-2.55855	0.0265521	0.937213	down	14.1521	83.8612	48	3904	120	15466	1000	5049	0.834126	40.3693	1.25284	192.016	11.0846	48.4826
ENSRNOG00000007246	Atxn7	1.77167	0.0265539	0.937213	up	2.41038	0.635212	54	244	466	55	52	99	0.802887	2.18011	4.24815	0.588931	0.492108	0.824598
ENSRNOG00000054462	AABR07065766.1	3.41845	0.0266309	0.937213	up	21.7088	1.93974	0	77	1110	7	38	64	0	4.12965	60.9969	0.449594	2.17044	3.19919
ENSRNOG00000028910	Ccdc9b	1.75325	0.0266573	0.937213	up	17.4067	5.09304	155	780	2730	262	429	370	3.57345	10.6656	37.9809	4.29158	6.28793	4.69962
ENSRNOG00000047387	Lnpep	2.85597	0.0268303	0.939046	up	2.04043	0.195644	130	115	378	58	0	0	1.86953	0.978179	3.27359	0.586933	0	0
ENSRNOG00000050944	AABR07065768.1	-2.44591	0.0268316	0.939046	down	23.8275	130.273	47	200	694	84	339	5284	5.67218	14.5198	51.2906	7.28771	26.4132	357.119
ENSRNOG00000046011	AABR07065645.1	-2.83601	0.0269018	0.939361	down	3.6428	26.6251	8	77	83	75	7	1256	0.803521	4.83869	5.2862	5.57724	0.411712	73.8864
ENSRNOG00000056760	AABR07065656.8	-2.66224	0.0269648	0.939427	down	1.92103	12.6935	7	12	76	57	36	581	0.589429	0.663449	4.51022	3.98146	2.16757	31.9314
ENSRNOG00000056043	AABR07065684.1	-2.68676	0.0270814	0.940783	down	1.41428	9.64996	3	9	59	65	23	417	0.206338	0.522318	3.51419	4.53828	1.43273	22.9789
ENSRNOG00000016021	Lims2	1.25466	0.027198	0.940783	up	43.8991	18.3397	3022	3009	4577	1260	1953	1857	52.6242	31.0522	48.0209	15.6078	21.6151	17.796
ENSRNOG00000014076	Mbnl1	1.7345	0.0272478	0.940783	up	11.5024	3.38669	120	714	1313	118	137	406	3.08666	10.9462	20.4745	2.15786	2.23798	5.76423
ENSRNOG00000018854	Nppc	-2.40443	0.0272487	0.940783	down	0.295812	1.99554	0	22	15	137	12	72	0	0.517563	0.369874	4.0388	0.316479	1.63135
ENSRNOG00000014385	Wnt2b	1.71952	0.0274113	0.942848	up	5.49452	1.59877	81	587	436	74	90	167	1.9284	8.2965	6.25867	1.25087	1.35894	2.18651
ENSRNOG00000024243	Cadm4	-2.0919	0.0274312	0.942848	down	7.45226	32.096	57	954	226	3690	162	975	1.66964	16.6785	4.00867	77.4458	3.02138	15.8209
ENSRNOG00000062199	AABR07044460.1	2.15214	0.0275723	0.943683	up	1.83383	0.33507	58	7	53	2	14	14	3.37772	0.244611	1.87916	0.0814	0.496142	0.427669
ENSRNOG00000015403	Cd52	2.07442	0.0275783	0.943683	up	2.83714	0.597368	65	49	23	7	3	30	5.12705	2.28635	1.09802	0.350728	0.137214	1.30416
ENSRNOG00000042224	Cyp2j10	1.39487	0.0277907	0.946379	up	4.65454	1.70805	502	586	729	107	432	224	5.44123	3.76671	4.75567	0.819048	2.97646	1.32864
ENSRNOG00000012337	Pde1c	1.68795	0.0278306	0.946379	up	0.430265	0.0645766	4	63	118	14	4	8	0.0457921	0.430436	0.814566	0.114968	0.0294002	0.0493615
ENSRNOG00000052873	Npnt	2.0068	0.0278481	0.946379	up	2.61454	0.575447	34	223	295	12	40	76	0.77	3.01026	4.06337	0.195526	0.576071	0.954743
ENSRNOG00000031760	Fmn1	1.58664	0.0279035	0.946379	up	0.970274	0.256344	102	139	327	19	93	52	0.778877	0.624002	1.50794	0.102303	0.450117	0.216611
ENSRNOG00000036834	Gpr84	-3.30739	0.0279797	0.946872	down	0.769987	8.51263	5	131	0	993	5	348	0.113515	2.19645	0	20.0377	0.072152	5.42806
ENSRNOG00000005711	Ptprd	1.58555	0.0280494	0.947145	up	9.074	2.95675	1231	1351	6756	275	1677	1321	5.49162	3.57034	18.16	0.871556	4.75431	3.24437
ENSRNOG00000024824	Col22a1	1.56292	0.0281867	0.948018	up	0.347228	0.0513713	16	100	75	12	15	0	0.131723	0.517897	0.392065	0.073467	0.080647	0
ENSRNOG00000017899	Akr7a3	1.56737	0.0281987	0.948018	up	184.21	62.0904	11299	2195	6346	896	4607	3580	380.246	43.7552	128.63	21.4401	98.5441	66.2869
ENSRNOG00000015308	Pbk	-1.7114	0.0282928	0.949107	down	2.44467	8.23326	52	326	120	304	885	524	1.20116	4.46381	1.66903	5.00789	13.0203	6.67158
ENSRNOG00000046663	LOC498276	-2.31257	0.0287133	0.956751	down	13.0821	65.3843	297	4577	284	17608	903	5061	3.65723	33.4814	2.10766	154.691	7.07675	34.3855
ENSRNOG00000005639	Ar	1.43384	0.028777	0.956751	up	0.260828	0.0335587	18	50	49	0	0	18	0.182882	0.301234	0.298369	0	0	0.100676
ENSRNOG00000052664	LOC100910717	2.7576	0.0289038	0.956751	up	4.90052	0.639429	88	1790	1645	264	144	0	0.599872	7.29183	6.80987	1.29029	0.627999	0
ENSRNOG00000001295	S100b	1.34294	0.0289108	0.956751	up	19.5969	7.66486	1286	836	464	613	250	385	36.7004	14.1271	7.9634	12.436	4.51941	6.03921
ENSRNOG00000019048	Sod2	-1.84205	0.0289358	0.956751	down	82.0485	294.417	810	15131	3669	37680	7435	20845	16.6192	184.14	45.3867	550.599	97.0522	235.601
ENSRNOG00000016628	Scgn	1.82978	0.0289398	0.956751	up	4.38116	1.16059	94	113	163	13	57	43	4.76278	3.39613	4.98458	0.462759	1.83503	1.18398
ENSRNOG00000049661	Inafm1	1.25724	0.0289862	0.956751	up	25.8485	10.7554	1763	667	928	434	800	570	50.3168	11.2843	15.9444	8.81612	14.5036	8.94652
ENSRNOG00000057826	AABR07040412.1	1.65674	0.0290747	0.956751	up	2.00713	0.568287	114	117	197	19	72	48	2.26778	1.38142	2.37219	0.269674	0.910572	0.524616
ENSRNOG00000013069	Sapcd2	-1.73241	0.029094	0.956751	down	2.93262	9.97687	55	363	87	390	812	548	1.49869	5.87793	1.42126	7.58413	14.103	8.24343
ENSRNOG00000021010	Arl2	1.2741	0.0291816	0.956751	up	37.425	15.416	2926	1094	999	802	1077	848	78.7029	17.4024	16.1697	15.3212	18.3981	12.5287
ENSRNOG00000008036	Dennd4c	1.51019	0.0292057	0.956751	up	6.18047	2.10486	260	997	2888	314	512	608	1.85814	4.23026	12.453	1.59864	2.32576	2.39017
ENSRNOG00000017780	Akr7a2	1.40318	0.0294386	0.96233	up	134.054	50.6227	10096	2995	3320	2077	3134	3215	292.74	51.4552	57.9655	42.8431	57.7365	51.2884
ENSRNOG00000052173	AABR07008439.1	2.16593	0.0295724	0.964502	up	1.07485	0.161801	20	63	169	0	20	21	0.408183	0.750932	2.06542	0	0.257988	0.227415
ENSRNOG00000007905	Itga7	1.32043	0.0296591	0.964502	up	30.6571	12.2156	5656	2678	6228	1439	3079	2544	47.3173	13.2706	31.3835	8.56051	16.3738	11.7124
ENSRNOG00000037853	Rarres1	-1.74934	0.0297171	0.964502	down	17.8465	60.237	128	2138	487	5149	675	2912	4.03403	40.2008	9.30458	116.253	13.5983	50.8594
ENSRNOG00000031607	RT1-CE3	-1.62044	0.0298547	0.964502	down	5.45917	16.9927	58	520	143	500	934	828	2.07637	11.185	3.11611	12.894	21.5491	16.535
ENSRNOG00000048053	AC128859.3	-1.71051	0.0299596	0.964502	down	3.98487	13.2688	78	389	110	781	643	510	2.48687	7.36595	2.10179	17.7591	13.0762	8.97093
ENSRNOG00000047599	AABR07065802.1	-2.86051	0.0300212	0.964502	down	2.75684	20.6484	0	56	42	221	6	497	0	4.67873	3.5918	22.3979	0.529545	39.0177
ENSRNOG00000007178	Cd8a	-1.99178	0.0302332	0.964502	down	8.30265	33.3197	147	925	204	2782	163	2167	4.45713	16.7151	3.73568	60.4137	3.15554	36.3897
ENSRNOG00000027831	Map7d3	1.52292	0.0302479	0.964502	up	1.3029	0.388181	90	165	209	50	50	48	1.12117	1.2191	1.56841	0.441736	0.396839	0.32597
ENSRNOG00000018413	Per3	1.39264	0.0303348	0.964502	up	5.03195	1.8546	326	993	2318	298	533	556	2.12325	3.83798	9.13463	1.37117	2.20282	1.98981
ENSRNOG00000002232	Aff1	1.66856	0.0304092	0.964502	up	7.34043	2.24052	151	1196	2810	491	261	480	1.30102	6.1136	14.6067	3.01115	1.43086	2.27956
ENSRNOG00000009590	Stox2	1.59086	0.0304143	0.964502	up	0.464588	0.0874283	21	67	216	15	4	42	0.14779	0.287194	0.958781	0.0734886	0.0187576	0.170039
ENSRNOG00000002397	Slc30a10	2.3294	0.0304258	0.964502	up	4.22231	0.759994	479	106	1995	5	414	87	3.48175	0.453357	8.73181	0.020691	1.91158	0.347716
ENSRNOG00000061519	Asap2	1.59202	0.0304551	0.964502	up	4.16698	1.31539	126	423	810	105	96	250	1.82113	3.62129	7.05853	1.08047	0.875184	1.99052
ENSRNOG00000029594	AABR07064000.1	1.28418	0.0304617	0.964502	up	92.652	37.9843	1424	1791	2063	737	1279	347	106.154	79.1236	92.6786	39.1083	60.6313	14.2132
ENSRNOG00000056285	AABR07065693.3	-2.20738	0.0304797	0.964502	down	5.20911	24.4194	26	56	208	93	180	1238	2.15856	2.81336	10.6554	5.60517	9.71386	57.9392
ENSRNOG00000015423	Ccna2	-1.48629	0.0305095	0.964502	down	5.51212	15.6234	84	1003	408	654	1972	1630	1.49952	10.6435	4.39334	8.31878	22.467	16.0843
ENSRNOG00000047781	Slc25a23	1.67969	0.0307309	0.969506	up	11.0205	3.37127	134	628	1665	142	207	419	2.92363	8.15861	21.9794	2.19807	2.87093	5.04483
ENSRNOG00000016552	Hmgcs1	-1.53966	0.0308429	0.971045	down	15.591	45.5178	391	3359	1950	2248	8487	6151	5.13238	26.1895	15.4511	21.0414	70.9734	44.5388
ENSRNOG00000046947	Ak5	1.743	0.0310941	0.976953	up	1.93082	0.506704	89	142	399	14	79	88	1.24329	1.17759	3.37158	0.139756	0.702998	0.677358
ENSRNOG00000047175	Cryaa	-2.67721	0.0315989	0.990788	down	0.0713733	0.99613	0	10	0	72	0	58	0	0.21412	0	1.84945	0	1.13895
ENSRNOG00000028992	Acan	1.37861	0.0316847	0.991454	up	0.43643	0.106305	32	101	207	24	28	33	0.19254	0.360047	0.756702	0.104164	0.104914	0.109837
ENSRNOG00000023576	RGD1305645	1.53967	0.0317541	0.991605	up	10.8721	3.67399	276	292	401	193	79	84	13.0179	8.18084	11.4175	6.47246	2.37246	2.17704
ENSRNOG00000006824	Hdac11	1.20945	0.0319171	0.991773	up	9.74257	4.15625	714	599	1102	255	497	440	12.0444	5.98699	11.1963	3.05856	5.32855	4.08165
ENSRNOG00000001859	Sdf2l1	-1.52795	0.0319457	0.991773	down	37.7219	108.969	555	2113	1719	2112	3606	8024	22.0985	49.8541	41.2131	59.8175	91.2587	175.832
ENSRNOG00000005792	Ankef1	1.51	0.0319531	0.991773	up	1.17296	0.346951	128	126	94	19	54	52	1.73617	1.01621	0.7665	0.182954	0.467261	0.390639
ENSRNOG00000009711	Hepacam2	1.44814	0.0320992	0.994299	up	73.2461	26.7808	3656	4002	6672	455	3430	2126	79.9689	51.8721	87.8974	7.06887	47.6819	25.5918
ENSRNOG00000021615	Mettl26	1.32274	0.0323145	0.99729	up	34.1739	13.6018	2474	682	588	413	937	724	78.4836	12.8167	11.2212	9.30685	18.8795	12.6191
ENSRNOG00000019481	Cyp8b1	2.94174	0.032362	0.99729	up	5.52994	0.632742	229	4	898	0	91	56	4.91895	0.050953	11.6199	0	1.24155	0.656674
ENSRNOG00000030818	RGD1561034	1.73794	0.0323905	0.99729	up	2.14067	0.571749	69	94	155	17	18	64	2.02685	1.64252	2.75264	0.349653	0.336823	1.02877
ENSRNOG00000037960	Stum	2.18401	0.0326061	1	up	5.69756	1.17583	21	90	296	14	21	54	1.40994	3.60348	12.0793	0.640928	0.878123	2.00844
ENSRNOG00000020836	Rorc	1.17392	0.0329562	1	up	14.6695	6.44608	1137	1072	2183	334	767	1147	16.2096	9.05355	18.7454	3.38815	6.9508	8.99928
ENSRNOG00000014090	Retsat	1.35485	0.0329582	1	up	359.407	140.458	29398	14113	31231	8787	16747	9472	560.307	159.383	358.531	119.148	202.873	99.3528
ENSRNOG00000011696	Lifr	1.68287	0.03311	1	up	1.30971	0.339073	64	244	486	70	20	123	0.497193	1.13388	2.29806	0.386656	0.099499	0.531064
ENSRNOG00000021840	Cped1	1.77699	0.0331609	1	up	5.35643	1.49214	65	1666	1447	247	204	420	0.540986	8.24768	7.28062	1.4657	1.0817	1.92903
ENSRNOG00000006378	Mga	1.3669	0.0332643	1	up	2.41015	0.873244	247	691	1575	267	241	433	1.11138	1.84382	4.27525	0.855361	0.690494	1.07388
ENSRNOG00000014427	Chrnb4	2.02647	0.0332996	1	up	4.6747	1.07197	36	236	998	70	136	77	0.650243	2.51826	10.8556	0.893238	1.55732	0.765362
ENSRNOG00000019118	Slc13a3	-2.09825	0.033329	1	down	0.30676	1.64171	20	66	18	381	48	129	0.263809	0.515675	0.140797	3.58559	0.401894	0.937643
ENSRNOG00000056716	Zbtb20	1.32765	0.0333546	1	up	0.60532	0.181011	119	85	155	44	26	56	0.824092	0.346348	0.645519	0.215107	0.114709	0.213216
ENSRNOG00000058539	Ccnb1	-1.47912	0.0334045	1	down	7.25352	20.4001	88	900	339	681	1905	1136	2.31458	14.0615	5.38446	12.7679	31.9409	16.4914
ENSRNOG00000059447	AC109901.2	-1.79878	0.0337977	1	down	14.2768	49.9207	67	143	343	209	555	1364	8.01907	10.1288	24.6825	17.7618	42.205	89.7953
ENSRNOG00000050118	AABR07065750.2	-2.30694	0.0340596	1	down	108.698	538.267	132	572	3706	1367	902	21500	15.8281	40.8542	269.411	117.337	69.1936	1428.27
ENSRNOG00000000827	Ier3	-1.53334	0.0340971	1	down	24.7219	71.7485	391	2099	1014	5409	1374	3259	12.891	41.1016	20.1732	127.159	28.833	59.2539
ENSRNOG00000002919	Gfap	-1.67424	0.0341283	1	down	1.02008	3.47476	27	317	86	681	268	452	0.304761	2.16315	0.592346	5.59671	1.96045	2.86712
ENSRNOG00000054549	Lss	-1.35258	0.0341562	1	down	4.86378	12.5759	133	1702	691	1645	1848	3050	1.24753	9.45119	3.89262	10.9779	11.0051	15.7448
ENSRNOG00000053550	Itga1	1.51054	0.0341597	1	up	7.57983	2.59546	206	1166	2230	492	289	425	2.08392	7.01387	13.6417	3.5496	1.86149	2.37529
ENSRNOG00000007975	Ncoa2	1.68789	0.0345742	1	up	5.20403	1.54627	142	537	1929	103	225	483	1.35895	3.06139	11.1917	0.70264	1.37679	2.55938
ENSRNOG00000018580	Klk8	2.05622	0.0348934	1	up	25.9539	6.16451	2300	68	616	22	798	221	66.0591	1.14498	10.6575	0.448003	14.5604	3.4851
ENSRNOG00000033581	AABR07044388.2	1.32839	0.0350202	1	up	17.9174	7.07472	2711	7275	10983	1736	3370	3657	10.6776	16.9931	26.0814	4.86061	8.43801	7.92556
ENSRNOG00000045728	AABR07033887.1	1.85757	0.035149	1	up	1.28877	0.283219	69	193	423	74	4	75	0.605683	1.00833	2.25229	0.463302	0.022301	0.364053
ENSRNOG00000038319	Akr1c19	1.52339	0.0352197	1	up	16.4325	5.65112	718	317	1116	48	457	398	22.4234	5.87347	21.0007	1.04873	9.06446	6.84017
ENSRNOG00000001335	Zkscan1	1.70063	0.0352721	1	up	6.14314	1.82071	98	529	1585	114	224	330	1.31337	4.22764	12.8884	1.09183	1.9224	2.44791
ENSRNOG00000000251	St6galnac1	1.73189	0.0352917	1	up	96.0803	28.8559	1947	6057	18142	660	1574	6315	34.0878	62.8343	191.319	8.2133	17.5088	60.8455
ENSRNOG00000011076	Ank2	1.56486	0.0353048	1	up	1.16947	0.329093	69	603	1002	197	74	188	0.231755	1.21721	2.05945	0.477323	0.159514	0.350443
ENSRNOG00000032178	Cenpa	-1.63005	0.0354135	1	down	1.4087	4.5698	28	274	102	232	584	508	0.467857	2.72649	1.03177	2.77441	6.23729	4.69771
ENSRNOG00000008849	Guca2a	2.145	0.0354596	1	up	4004.02	905.213	221320	10514	49600	1625	74042	18135	10327.3	290.718	1394.06	53.9263	2196.02	465.696
ENSRNOG00000007377	Slit3	-1.81465	0.0355142	1	down	11.3577	40.2051	197	5865	1595	15025	2169	7866	1.44605	25.5619	7.06513	78.6342	10.1379	31.8433
ENSRNOG00000017223	Plg	-1.79629	0.0355613	1	down	0.127381	0.689751	0	18	32	22	118	131	0	0.136372	0.245772	0.19897	0.954101	0.916183
ENSRNOG00000008988	Cyp2d2	1.90999	0.0355944	1	up	3.45972	0.847222	218	12	308	25	89	48	5.5143	0.174976	4.68988	0.445551	1.42893	0.667185
ENSRNOG00000010208	Timp1	-1.84858	0.0356693	1	down	138.638	499.558	1903	7773	1255	19476	6419	14970	108.945	263.714	43.2536	793.375	233.603	471.696
ENSRNOG00000010605	Gsc	-2.11317	0.0356735	1	down	0.0854723	0.702428	0	12	0	46	4	42	0	0.256417	0	1.17877	0.092715	0.835796
ENSRNOG00000017689	Itih3	1.54707	0.0357817	1	up	0.897695	0.241416	78	107	85	8	44	34	1.09478	0.884798	0.713509	0.0799363	0.387449	0.256862
ENSRNOG00000019751	Cyb5r2	1.88676	0.0359182	1	up	0.976545	0.191112	43	39	48	0	18	13	1.32946	0.713526	0.886651	0	0.351096	0.222241
ENSRNOG00000012477	Eef1a2	1.4667	0.0361141	1	up	6.72258	2.36847	269	680	475	273	71	179	5.65993	8.48249	6.02531	4.08405	0.950297	2.07106
ENSRNOG00000061544	Spock2	2.09473	0.0361306	1	up	4.17996	0.90199	27	248	341	45	9	82	0.867455	4.86618	6.80624	1.04639	0.179592	1.47999
ENSRNOG00000053899	AABR07051731.1	-2.46749	0.0361641	1	down	9.53361	53.1818	71	84	188	139	67	2106	8.64418	6.06155	13.8951	12.0806	5.18796	142.277
ENSRNOG00000014652	Aqp8	2.69104	0.0361734	1	up	6.11813	0.862889	6	27	1063	30	49	75	0.162412	0.432095	17.7599	0.585298	0.862768	1.1406
ENSRNOG00000008012	Abcb1b	1.70676	0.0362735	1	up	12.3722	3.72085	2214	1201	15708	910	2544	2660	6.62572	2.12895	28.3621	1.93703	4.84234	4.38317
ENSRNOG00000005787	Erp27	-3.60311	0.036345	1	down	0.366347	5.56698	0	44	0	263	0	381	0	1.09904	0	7.87907	0	8.82188
ENSRNOG00000020676	Ppp1r14a	1.15815	0.0364471	1	up	106.588	47.7053	3060	2623	1675	945	1827	1242	174.024	88.3881	57.3519	38.2335	66.0227	38.8598
ENSRNOG00000042309	Kiaa0408L	1.55829	0.0364538	1	up	0.913608	0.244175	52	253	112	35	44	36	0.528659	1.52866	0.6835	0.251652	0.279443	0.20143
ENSRNOG00000051120	Il17d	1.35056	0.0364887	1	up	6.95833	2.66784	313	216	300	94	132	160	10.5244	4.29695	6.05359	2.2504	2.80199	2.95114
ENSRNOG00000011009	Cmtm4	1.81171	0.0367795	1	up	8.00307	2.20818	94	252	958	37	149	193	2.74298	4.37455	16.8917	0.752473	2.76235	3.10971
ENSRNOG00000008310	Mpo	1.99807	0.0368742	1	up	3.15143	0.713946	535	63	144	172	4	46	7.67671	0.534637	1.24294	1.75417	0.0349217	0.35275
ENSRNOG00000030111	Cyp11b2	-2.25001	0.0369446	1	down	0.135512	1.0203	0	91	4	453	22	144	0	0.393123	0.0134117	2.37817	0.101856	0.580869
ENSRNOG00000002711	Nuf2	-1.61185	0.03696	1	down	3.03852	9.49265	54	466	129	404	1064	559	1.198	6.18161	1.73595	6.43523	15.151	6.89176
ENSRNOG00000032882	AY172581.19	1.46653	0.037011	1	up	6218.41	2250.08	24317	3990	6143	3652	8284	5687	14931.6	1451.53	2272.05	1595.47	3232.96	1921.82
ENSRNOG00000004659	Creld2	-1.72722	0.0371357	1	down	32.3048	107.189	715	1841	2099	1630	3240	12659	22.5704	34.4381	39.906	36.6152	65.0086	219.943
ENSRNOG00000019129	Fcgbp	1.58729	0.0372326	1	up	392.422	130.53	21753	169909	164249	16571	45551	59764	115.684	535.443	526.138	62.7003	153.973	174.916
ENSRNOG00000003800	Rgs9	1.45707	0.0373854	1	up	3.27749	1.13019	279	192	283	87	163	53	4.86908	1.9841	2.97928	1.07961	1.80516	0.505817
ENSRNOG00000015131	Ube2c	-1.53112	0.0374661	1	down	4.38233	12.8544	215	896	255	845	1936	1465	3.14243	7.76568	2.23888	8.78765	17.9887	11.7868
ENSRNOG00000016358	Apba2	1.55519	0.0375532	1	up	0.512515	0.108429	16	145	64	22	13	12	0.175751	0.938348	0.423447	0.169061	0.083946	0.072281
ENSRNOG00000019987	Scand1	1.41673	0.0375853	1	up	344.315	128.904	14921	3183	3103	2922	4611	3602	825.269	104.296	103.38	114.984	162.094	109.634
ENSRNOG00000008444	Cbl	1.52401	0.0378984	1	up	2.52829	0.813908	125	243	460	108	43	131	1.72793	2.0003	3.85665	1.0611	0.378083	1.00254
ENSRNOG00000000825	Calhm5	-2.49957	0.0380162	1	down	0.338752	2.38122	12	69	4	477	16	67	0.221036	0.750941	0.04428	6.27901	0.187848	0.676799
ENSRNOG00000058323	LOC102550026	2.64054	0.0380592	1	up	1.42951	0.145284	47	125	310	44	0	0	0.651945	1.03119	2.60538	0.435853	0	0
ENSRNOG00000036674	Cd7	1.23021	0.0381833	1	up	14.9588	6.31891	561	418	443	128	260	360	23.4021	10.3452	11.1293	3.78324	6.89892	8.27459
ENSRNOG00000001767	RGD1562339	1.81763	0.0383932	1	up	9.73724	2.69069	54	299	467	77	31	123	3.03276	10.1286	16.0504	3.09246	1.11405	3.86556
ENSRNOG00000014786	Ccne1	-1.64627	0.0384228	1	down	1.8658	6.0534	38	295	78	314	451	597	0.802997	3.78531	1.00909	4.82925	6.2081	7.12285
ENSRNOG00000010350	Rcan2	1.43607	0.0386289	1	up	3.11452	1.088	144	542	558	170	94	181	1.67748	3.74431	3.92177	1.40757	0.695467	1.16095
ENSRNOG00000002607	Sox9	1.30927	0.0387811	1	up	9.31357	3.6986	553	618	2220	208	582	688	6.84485	4.53157	16.5643	1.83157	4.57527	4.68896
ENSRNOG00000006753	Tgm3	2.99554	0.0389952	1	up	31.0944	3.81137	10	8437	1447	708	9	386	0.155878	79.3026	13.8248	7.99	0.080661	3.36346
ENSRNOG00000017045	Zdhhc1	1.10393	0.0390306	1	up	8.84882	4.06342	772	1141	930	522	475	455	10.2051	8.94628	7.39508	4.89364	3.98585	3.31078
ENSRNOG00000015529	Cdca3	-1.58358	0.0390438	1	down	5.88941	17.851	134	635	188	613	1538	859	3.80019	10.6689	3.1992	12.3722	27.7566	13.4242
ENSRNOG00000011161	Slc2a12	1.39076	0.0390584	1	up	1.42225	0.480531	119	216	280	84	50	91	1.22086	1.31297	1.7329	0.608975	0.321486	0.511131
ENSRNOG00000008078	Kcnh6	1.64099	0.0391005	1	up	0.905408	0.22237	65	73	191	10	60	18	0.782955	0.526884	1.40639	0.0874059	0.46111	0.118595
ENSRNOG00000058202	Ppp2r2c	2.56398	0.0391108	1	up	1.4322	0.159108	0	61	221	3	17	12	0	0.908388	3.38822	0.0434164	0.274924	0.158984
ENSRNOG00000051147	AABR07011057.2	1.54789	0.0392589	1	up	0.462811	0.092487	8	52	51	9	5	10	0.152719	0.616852	0.618863	0.11879	0.05271	0.105961
ENSRNOG00000007483	Ccnf	-1.45727	0.0394564	1	down	2.50819	7.06179	51	693	212	696	955	1010	0.64976	5.24842	1.6264	6.32751	7.75496	7.1029
ENSRNOG00000025302	Cdca2	-1.52487	0.0395248	1	down	1.22366	3.70897	32	315	163	238	718	605	0.369595	2.16711	1.13427	1.96266	5.29804	3.86622
ENSRNOG00000003669	Myocd	1.65159	0.0396025	1	up	1.4455	0.391918	35	325	491	67	67	95	0.279054	1.59651	2.46095	0.391746	0.353861	0.430147
ENSRNOG00000052246	AABR07070085.1	1.65873	0.0397593	1	up	159.103	50.3222	2658	79	393	402	705	358	431.328	7.56733	38.4121	46.3627	72.6983	31.9054
ENSRNOG00000026974	Dbndd1	1.52902	0.0397868	1	up	0.911022	0.250332	49	48	54	11	21	18	1.21431	0.703268	0.81549	0.179228	0.322783	0.248984
ENSRNOG00000016826	Pla2g2d	-1.47794	0.0398591	1	down	6.85812	19.2819	96	1045	334	1760	551	1766	2.15165	13.9105	4.51223	28.1457	7.86289	21.8372
ENSRNOG00000031689	Trim15	-1.46152	0.0398722	1	down	4.83157	13.4814	82	407	285	455	951	819	2.39369	7.07003	5.03097	9.49312	17.7262	13.2249
ENSRNOG00000052862	RF00017	3.5793	0.0400011	1	up	16.7278	1.30783	308	61	0	0	0	49	44.9291	5.25447	0	0	0	3.9235
ENSRNOG00000033680	LOC108348266	2.39768	0.0400104	1	up	2.35268	0.365446	183	9	354	53	39	0	3.20665	0.0933832	3.75802	0.660329	0.436009	0
ENSRNOG00000016337	Slc22a1	1.42725	0.0402846	1	up	13.7382	5.04558	1209	236	827	71	609	438	26.9758	3.12053	11.1181	1.12052	8.63627	5.37994
ENSRNOG00000012722	Ppdpf	1.2948	0.040369	1	up	157.69	64.2139	5372	1619	1724	1067	2291	1430	344.855	61.5819	66.6323	48.6919	93.4425	50.5075
ENSRNOG00000004712	Angptl1	1.78728	0.0404052	1	up	3.24633	0.869493	47	633	271	99	83	64	0.779843	6.24422	2.71491	1.15777	0.874706	0.576001
ENSRNOG00000014739	Wfdc2	1.29145	0.0404786	1	up	136.383	55.659	4690	2553	1425	673	2390	1608	271.799	87.6513	49.6997	27.7202	87.9889	51.268
ENSRNOG00000001159	Tff3	1.27052	0.0405027	1	up	689.075	285.57	12253	11087	6256	2083	7212	5992	1121.26	601.169	344.798	135.57	419.405	301.735
ENSRNOG00000018238	Nuggc	-2.15149	0.0405928	1	down	0.202259	1.2429	0	32	35	29	37	358	0	0.287041	0.319737	0.31865	0.361781	3.04827
ENSRNOG00000002365	Itm2a	-1.9311	0.0405945	1	down	22.4485	85.8877	150	3645	423	10508	1061	3015	3.92996	56.727	6.68844	196.374	17.7108	43.5787
ENSRNOG00000001766	Tfrc	-1.464	0.0406516	1	down	18.4009	50.9386	1056	4124	4546	4777	14023	9003	9.34198	21.6282	24.2324	30.0779	78.886	43.8519
ENSRNOG00000007234	Cyp51	-1.55206	0.0406598	1	down	25.2806	74.3246	1132	6187	1966	4627	12328	11729	14.3433	46.4867	15.0116	41.7451	99.3682	81.8605
ENSRNOG00000017805	Duoxa2	-1.35623	0.0408389	1	down	19.5012	50.0821	172	1509	439	1726	1661	2057	7.56002	39.3183	11.6252	54.0247	46.4244	49.7973
ENSRNOG00000016148	Gtse1	-1.58885	0.0409057	1	down	2.07718	6.44915	66	454	92	510	714	713	1.04591	4.30547	0.880143	5.80448	7.26031	6.28266
ENSRNOG00000008720	LOC103692173	1.13144	0.0409553	1	up	53.5874	24.4062	2962	1247	2099	917	1556	1129	95.9137	23.9117	40.9366	21.1109	32.0081	20.0995
ENSRNOG00000046615	AABR07064724.1	2.85747	0.0410769	1	up	121.731	16.7103	647	73	1	111	1	29	342.357	22.6598	0.176548	41.5255	0.19933	8.40601
ENSRNOG00000013042	Htr1b	1.94647	0.041106	1	up	1.85359	0.406861	17	204	109	29	9	34	0.448931	3.31583	1.79601	0.565445	0.13999	0.515147
ENSRNOG00000054426	Zfp704	1.93271	0.0412788	1	up	1.34214	0.277749	14	44	204	8	20	29	0.331931	0.642847	3.05164	0.141628	0.303779	0.38784
ENSRNOG00000003614	Mgat5	1.60953	0.0415156	1	up	9.26893	2.97025	189	394	2232	181	314	433	2.97084	3.67276	21.1632	2.02655	3.13313	3.75107
ENSRNOG00000032368	Tlr11	1.61293	0.0417335	1	up	0.650238	0.145278	16	139	84	5	20	32	0.210421	1.07676	0.663533	0.03746	0.166765	0.23161
ENSRNOG00000018780	Sh3rf2	1.30888	0.0417756	1	up	8.46128	3.35563	564	605	865	92	516	327	9.91845	6.3014	9.164	1.13975	5.76205	3.1651
ENSRNOG00000003081	Ribc1	1.21007	0.0418211	1	up	13.7582	5.89017	2004	513	769	338	939	635	29.8492	4.52751	6.89797	3.57965	8.88922	5.20164
ENSRNOG00000006426	Syt1	1.56437	0.0418428	1	up	2.52364	0.787117	72	558	663	140	94	167	0.680433	3.11999	3.7705	0.932632	0.560472	0.868248
ENSRNOG00000017421	Alpk2	1.82929	0.0419696	1	up	0.727889	0.13297	16	101	399	6	60	30	0.108679	0.413853	1.66114	0.025166	0.259797	0.113948
ENSRNOG00000028701	C8g	1.50582	0.042004	1	up	6.08846	2.07914	231	92	116	60	86	44	11.8744	2.80461	3.58636	2.19662	2.80554	1.23525
ENSRNOG00000050819	Birc5	-1.50294	0.0421356	1	down	9.19283	26.2377	88	606	203	486	1143	999	4.23985	17.423	5.91566	16.7792	35.2537	26.6803
ENSRNOG00000034031	Vstm2l	1.74684	0.0421871	1	up	2.77287	0.75598	52	61	71	8	34	16	3.29055	2.30353	2.72453	0.363755	1.37554	0.528648
ENSRNOG00000048321	Tnfsf8	-1.53088	0.042287	1	down	0.0504733	0.33481	0	12	13	32	4	128	0	0.075049	0.076371	0.235356	0.026774	0.742299
ENSRNOG00000031716	LOC100910978	1.47644	0.0425139	1	up	2.8851	0.972771	108	412	393	123	67	126	1.58421	3.59382	3.47726	1.27878	0.622918	1.01661
ENSRNOG00000056332	Miga1	1.60518	0.0426769	1	up	0.72333	0.170625	18	39	87	9	8	20	0.411848	0.531591	1.22655	0.149189	0.107046	0.255639
ENSRNOG00000062127	AC134224.1	1.29543	0.0427794	1	up	65.832	26.7617	7343	2306	3729	1871	3610	1505	132.376	24.6277	40.492	23.9972	41.3601	14.9277
ENSRNOG00000011984	Cxcl14	1.28012	0.0429328	1	up	78.399	32.2229	2819	5024	5236	601	3169	2247	74.0775	78.2349	82.8847	11.2328	52.938	32.4979
ENSRNOG00000022946	Slc22a3	1.40568	0.0431864	1	up	2.28198	0.799056	189	125	499	67	115	141	2.29406	0.899027	3.65285	0.573406	0.887181	0.936581
ENSRNOG00000014837	Emilin2	-2.09088	0.0431964	1	down	9.13558	39.2443	36	3049	408	9585	471	3365	0.471024	23.7112	3.22455	89.5056	3.9261	24.3011
ENSRNOG00000030927	Grid2ip	1.2555	0.043311	1	up	3.49973	1.40775	339	629	239	113	187	265	4.1571	4.57463	1.76747	0.978987	1.4585	1.78575
ENSRNOG00000019190	Ankrd22	-1.96856	0.0436637	1	down	0.834934	3.55913	26	128	18	90	455	231	0.577697	1.68558	0.241521	1.4214	6.43315	2.82284
ENSRNOG00000020263	Atp1a3	-2.72496	0.0438062	1	down	0.907035	6.55794	0	363	23	2091	40	254	0	2.55913	0.161977	17.7099	0.301366	1.66259
ENSRNOG00000004972	Upp1	-1.99641	0.0438516	1	down	22.8378	91.4234	637	4035	447	13989	1159	4549	13.2272	49.6978	5.58835	206.926	15.3031	52.0413
ENSRNOG00000019176	Kcne5	1.7661	0.0438881	1	up	3.532	0.967816	32	83	122	18	27	24	2.16799	3.37856	5.04946	0.844354	1.15767	0.901427
ENSRNOG00000023870	Sh2d7	2.34478	0.0440457	1	up	4.99697	0.903374	33	47	711	4	54	94	1.01123	0.84466	13.135	0.08738	1.04005	1.58269
ENSRNOG00000002863	Cacna1e	1.45221	0.0440901	1	up	0.333463	0.0584138	8	43	244	16	4	33	0.044474	0.140712	0.815203	0.0627048	0.0140868	0.0984499
ENSRNOG00000020776	Dhcr7	-1.38916	0.0441321	1	down	8.22775	21.7126	393	1209	821	1049	2938	2934	6.0356	11.0317	7.61593	11.4856	28.7723	24.8798
ENSRNOG00000018839	Ntrk2	-1.81901	0.0441404	1	down	0.143448	0.758982	36	120	5	276	115	556	0.140954	0.279837	0.00955386	0.775967	0.288749	1.21223
ENSRNOG00000053047	Top2a	-1.32943	0.044175	1	down	6.48151	16.4396	187	2920	1077	2387	4320	3748	1.4161	13.1138	4.91465	12.8711	20.8127	15.6349
ENSRNOG00000046005	Scd2	-1.52519	0.0442475	1	down	31.5923	91.118	667	12413	5422	10591	11331	32377	5.59411	61.762	27.4207	63.2686	60.4704	149.615
ENSRNOG00000033169	Cpeb4	1.55268	0.0442491	1	up	5.70674	1.87938	127	404	1441	145	206	315	1.75834	3.31852	12.0434	1.42083	1.81441	2.40289
ENSRNOG00000012843	Aspg	1.60783	0.0443296	1	up	3.49058	1.07804	574	30	100	49	161	118	9.2245	0.283208	0.964035	0.55471	1.63888	1.04053
ENSRNOG00000011460	Arfgef3	1.77591	0.0443752	1	up	1.47452	0.359776	99	89	946	20	163	107	0.602555	0.321932	3.49908	0.084568	0.633322	0.361439
ENSRNOG00000054576	Gsdmc	1.47392	0.04439	1	up	52.7356	18.9209	548	5788	2875	323	1633	1421	15.1839	95.0385	47.9846	6.35278	28.7507	21.6593
ENSRNOG00000002419	Plp1	1.39963	0.0444273	1	up	2.92265	1.04566	140	523	301	114	74	178	1.93649	4.30764	2.52381	1.12408	0.650546	1.36235
ENSRNOG00000061304	Atp2b3	1.19999	0.0444448	1	up	0.216368	0.0377079	8	45	74	0	8	16	0.0659379	0.217607	0.365559	0	0.0405464	0.0725771
ENSRNOG00000000017	Steap1	-1.81939	0.0444538	1	down	2.79912	10.1319	60	287	42	685	374	352	1.96267	5.61243	0.822246	16.1222	7.86767	6.40589
ENSRNOG00000017783	Sfrp1	-1.41235	0.0444733	1	down	20.2979	54.1931	734	5690	2473	9089	5101	9496	7.98269	36.6999	16.2109	70.3994	35.29	56.8899
ENSRNOG00000001807	Sspn	1.67546	0.0450716	1	up	4.37875	1.30215	52	676	1079	162	179	180	0.61073	4.77624	7.74929	1.37265	1.3535	1.18029
ENSRNOG00000045984	AABR07065750.1	-2.25546	0.0451387	1	down	1.65493	8.27956	0	32	51	173	39	176	0	1.86693	3.09786	12.5072	2.50659	9.82493
ENSRNOG00000024000	Cd22	-1.58897	0.0451692	1	down	1.19921	3.80847	28	326	169	630	149	870	0.307814	2.16008	1.12974	5.01123	1.05434	5.35985
ENSRNOG00000014750	Fam208a	1.52423	0.0452846	1	up	2.9313	0.95388	90	453	1080	123	136	281	0.782481	2.33771	5.67371	0.760016	0.752917	1.34871
ENSRNOG00000030155	Bmp8a	2.04666	0.0454193	1	up	2.73805	0.586934	31	41	528	20	44	71	0.678487	0.526653	7.009	0.300362	0.608683	0.851756
ENSRNOG00000018962	Ctf1	1.23372	0.0454963	1	up	7.53531	3.14669	329	291	407	108	184	215	9.96783	5.22491	7.41318	2.31926	3.53604	3.58477
ENSRNOG00000048187	Epop	-2.12228	0.0455441	1	down	0.387888	2.02418	0	57	14	138	31	183	0	0.930325	0.233339	2.72089	0.548174	2.80347
ENSRNOG00000057701	Myom1	1.3827	0.0455577	1	up	2.3395	0.835551	150	444	710	76	217	199	1.24941	2.19764	3.57146	0.446696	1.1485	0.911455
ENSRNOG00000024650	Ckap2	-1.43601	0.0455952	1	down	3.40351	9.37952	78	644	259	494	1326	908	1.28722	6.339	2.58431	5.83181	14.0065	8.30025
ENSRNOG00000011063	Dennd1b	1.73695	0.0457756	1	up	2.48442	0.675335	61	143	465	15	60	122	1.04812	1.48054	4.92461	0.178659	0.670758	1.17659
ENSRNOG00000050708	AABR07065823.3	-2.08732	0.0457885	1	down	9.13955	39.1643	50	119	119	63	239	1126	7.06541	10.0929	10.2604	6.37923	21.8596	89.254
ENSRNOG00000032426	Slc10a5	1.68113	0.04586	1	up	3.62899	1.06284	176	46	387	26	123	57	4.39027	0.676635	5.82007	0.454656	1.94936	0.78452
ENSRNOG00000008236	Decr1	1.1813	0.0459163	1	up	67.6392	29.7699	3360	1212	2438	733	2152	1004	122.927	26.2687	53.7214	19.0709	50.0413	20.1975
ENSRNOG00000061254	AABR07015042.1	2.05157	0.0459519	1	up	106.288	25.5631	348	28	9	36	82	22	300.219	14.3307	4.31422	21.5814	44.9678	10.14
ENSRNOG00000003882	Cep350	1.29929	0.0459918	1	up	3.07587	1.19044	249	1105	2174	412	323	654	1.03379	2.73042	5.46341	1.21919	0.852219	1.49991
ENSRNOG00000007061	Arhgef33	1.46362	0.0460453	1	up	1.70487	0.554412	216	55	102	36	89	35	3.57351	0.531668	1.00944	0.42377	0.928304	0.311163
ENSRNOG00000014378	Il1r2	-2.33862	0.0461433	1	down	23.4666	119.104	120	3716	117	14790	409	2459	3.50772	64.8304	2.06152	309.825	7.65311	39.8342
ENSRNOG00000004398	Pkhd1l1	1.46249	0.0466584	1	up	0.560737	0.139759	33	465	367	14	104	102	0.10404	0.876215	0.701955	0.0314391	0.210263	0.177575
ENSRNOG00000014686	Kcnd3	1.55286	0.0467492	1	up	1.56585	0.467777	56	329	840	98	106	162	0.344589	1.20941	3.14354	0.432959	0.418008	0.552363
ENSRNOG00000006645	Ryr3	1.405	0.0470752	1	up	0.950786	0.296797	61	578	971	116	149	239	0.175475	0.988205	1.68868	0.238151	0.272543	0.379697
ENSRNOG00000002164	Nmu	1.6274	0.0471236	1	up	7.40562	2.32936	142	148	237	12	107	75	8.45593	5.22374	8.53719	0.469387	4.05075	2.46793
ENSRNOG00000031852	Lsamp	1.44913	0.0472255	1	up	6.28739	2.23933	339	145	152	126	112	44	12.3965	3.12532	3.34034	3.25812	2.58971	0.870161
ENSRNOG00000051189	AC141377.1	1.95864	0.0472708	1	up	1.27545	0.253861	29	47	79	0	20	16	1.04633	1.02483	1.75518	0	0.447766	0.313819
ENSRNOG00000055716	Oscar	-1.92003	0.0473802	1	down	1.675	6.61716	22	333	37	863	83	518	0.450214	4.11191	0.46287	12.8113	1.09121	5.94896
ENSRNOG00000026607	Tnfsf18	-1.91665	0.0474685	1	down	0.249435	1.21928	0	54	8	100	89	96	0	0.651178	0.097128	1.43744	1.1459	1.0745
ENSRNOG00000013262	Myl1	1.94408	0.0476896	1	up	2.33709	0.533353	109	13	100	20	39	3	4.34036	0.261939	2.40898	0.563814	0.982446	0.0537994
ENSRNOG00000042771	Apol3	-1.81339	0.0476977	1	down	4.31733	15.4254	201	285	180	1118	411	1175	5.43393	4.57874	2.9393	21.613	7.0892	17.5741
ENSRNOG00000049499	AABR07051535.1	-2.02437	0.0477119	1	down	1.14951	4.98318	3	13	39	70	36	129	0.22876	0.805073	2.4147	5.18068	2.35394	7.41493
ENSRNOG00000020624	Acadsb	1.90632	0.0477758	1	up	4.51365	1.13079	27	242	801	43	118	106	0.556727	2.97176	10.0125	0.634793	1.55225	1.20534
ENSRNOG00000033195	A1cf	1.75071	0.0477776	1	up	0.828917	0.176033	32	36	337	6	28	59	0.308047	0.204164	1.97454	0.041581	0.173182	0.313337
ENSRNOG00000020484	Trpm5	2.30421	0.0484862	1	up	2.66412	0.459657	43	59	960	3	130	53	0.51376	0.425352	7.05326	0.025449	1.00152	0.351997
ENSRNOG00000019342	Sult1a1	1.0064	0.0484893	1	up	30.8723	15.3176	1368	892	1292	651	676	790	47.3623	18.3117	26.943	16.0272	14.8767	15.0491
ENSRNOG00000045560	Gvin1	1.39837	0.0485173	1	up	10.5429	3.93748	690	6352	2082	344	1455	1749	3.8213	20.8602	6.94727	1.35459	5.12533	5.33253
ENSRNOG00000001515	Map3k20	1.62891	0.0488488	1	up	14.7958	4.71632	78	1018	1639	217	211	444	2.07482	16.0539	26.2588	4.09536	3.55365	6.49994
ENSRNOG00000009892	Adamts15	-1.48914	0.0490061	1	down	4.77515	13.5856	159	2294	885	5952	1189	1532	1.10765	9.49728	3.72054	29.5883	5.27788	5.89077
ENSRNOG00000046298	AABR07067401.1	1.69129	0.0491011	1	up	3.3484	0.967794	63	50	45	21	23	11	5.30013	2.48223	2.26284	1.2163	1.21152	0.475566
ENSRNOG00000050431	Aspn	1.12548	0.0492373	1	up	10.8916	4.93797	491	913	1287	334	555	417	8.87906	9.77502	14.0207	4.29533	6.37045	4.14814
ENSRNOG00000009872	Kcnh2	1.08243	0.0492468	1	up	6.29266	2.91881	484	1022	1175	322	444	586	5.07319	6.36407	7.44071	2.40511	2.9664	3.38493
ENSRNOG00000011697	Zfp827	1.45732	0.0493046	1	up	2.89871	0.992038	98	283	651	106	96	162	1.28654	2.21555	5.19405	0.99243	0.807772	1.17591
ENSRNOG00000017601	Srd5a1	1.34886	0.0493787	1	up	24.2518	9.46059	2160	404	3769	458	1700	757	33.6544	3.72765	35.3733	5.06731	16.828	6.4865
ENSRNOG00000010210	Slc7a11	-1.44426	0.0494914	1	down	0.290044	0.9614	8	226	69	426	208	311	0.03684	0.635766	0.197525	1.44357	0.62711	0.813517
ENSRNOG00000019161	Cpeb1	1.29419	0.0495224	1	up	0.411362	0.108516	24	28	90	8	14	19	0.314314	0.21415	0.705622	0.0745876	0.116466	0.134494
ENSRNOG00000055156	LOC103694380	-2.21876	0.049726	1	down	0.708094	3.66161	0	107	35	411	31	225	0	1.59603	0.528249	7.37441	0.489558	3.12086
ENSRNOG00000010447	Tmod2	1.59335	0.0497403	1	up	2.73167	0.838417	64	119	203	42	23	64	2.04006	2.24127	3.91369	0.949447	0.452777	1.11303
