# Supplementary material for: Integrative transcriptomic and metabonomic profiling analyses reveal the molecular mechanism of Chinese traditional medicine huankuile suspension on TNBS-induced ulcerative colitis
Source: Aging (Albany NY). 2021 Feb 1;13(4):5087–103. doi: 10.18632/aging.202427 (PMC7950284; doi:10.18632/aging.202427)
Supplement: Supplementary Table 2 [file aging-13-202427-s002.xls]

## Sheet: Supplementary Table 2
Supplementary Table 2. The list of GO enrichment analysis of differentially expressed genes between HKL treated UC samples and water treated UC samples.
ID	Description	Class	Enrich_factor	FDR	GeneCount	GeneID
GO:0002443	leukocyte mediated immunity	biological_process	3.80033	0	39	AABR07065645.1,AABR07065651.4,AABR07065651.8,AABR07065693.2,AABR07065693.3,AABR07065750.1,AABR07065750.2,AABR07065768.1,AABR07065768.3,AABR07065772.2,AABR07065772.4,AABR07065774.1,AABR07065778.3,AABR07065789.1,AABR07065789.2,AABR07065789.3,AABR07065792.2,AABR07065798.1,AABR07065802.1,AABR07065814.2,AABR07065815.1,AABR07065815.2,AABR07065823.3,AABR07065827.1,AABR07065883.1,C3,Cbl,Cd8a,Cfb,Chga,Den…
GO:0002449	lymphocyte mediated immunity	biological_process	4.17913	0	35	AABR07065645.1,AABR07065651.4,AABR07065651.8,AABR07065693.2,AABR07065693.3,AABR07065750.1,AABR07065750.2,AABR07065768.1,AABR07065768.3,AABR07065772.2,AABR07065772.4,AABR07065774.1,AABR07065778.3,AABR07065789.1,AABR07065789.2,AABR07065789.3,AABR07065792.2,AABR07065798.1,AABR07065802.1,AABR07065814.2,AABR07065815.1,AABR07065815.2,AABR07065823.3,AABR07065827.1,AABR07065883.1,C3,Cd8a,Cfb,Dennd1b,Igh-…
GO:0002460	adaptive immune response based on somatic recombination of immune receptors built from immunoglobulin superfamily domains	biological_process	4.2536	0	36	AABR07065645.1,AABR07065651.4,AABR07065651.8,AABR07065693.2,AABR07065693.3,AABR07065750.1,AABR07065750.2,AABR07065768.1,AABR07065768.3,AABR07065772.2,AABR07065772.4,AABR07065774.1,AABR07065778.3,AABR07065789.1,AABR07065789.2,AABR07065789.3,AABR07065792.2,AABR07065798.1,AABR07065802.1,AABR07065814.2,AABR07065815.1,AABR07065815.2,AABR07065823.3,AABR07065827.1,AABR07065883.1,C3,Cd8a,Cfb,Dennd1b,Igh-…
GO:0005102	signaling receptor binding	molecular_function	2.29222	0	97	AABR07065645.1,AABR07065651.4,AABR07065651.8,AABR07065693.2,AABR07065693.3,AABR07065750.1,AABR07065750.2,AABR07065768.1,AABR07065768.3,AABR07065772.2,AABR07065772.4,AABR07065774.1,AABR07065778.3,AABR07065789.1,AABR07065789.2,AABR07065789.3,AABR07065792.2,AABR07065798.1,AABR07065802.1,AABR07065814.2,AABR07065815.1,AABR07065815.2,AABR07065823.3,AABR07065827.1,AABR07065883.1,Adipoq,Adm2,Adrb3,Amn,An…
GO:0005615	extracellular space	cellular_component	3.23556	0	129	AABR07027451.1,AABR07034736.1,AABR07051533.2,AABR07051535.1,AABR07051548.2,AABR07051675.1,AABR07051716.1,AABR07051731.1,AABR07056026.1,AABR07060792.1,AABR07060886.1,AABR07060944.1,AABR07060952.1,AABR07060953.1,AABR07060963.3,AABR07060971.1,AABR07060979.1,AABR07061005.2,AABR07061022.3,AABR07065645.1,AABR07065651.4,AABR07065651.8,AABR07065693.2,AABR07065693.3,AABR07065750.1,AABR07065750.2,AABR07065…
GO:0006910	phagocytosis, recognition	biological_process	8.80372	0	27	AABR07065645.1,AABR07065651.4,AABR07065651.8,AABR07065693.2,AABR07065693.3,AABR07065750.1,AABR07065750.2,AABR07065768.1,AABR07065768.3,AABR07065772.2,AABR07065772.4,AABR07065774.1,AABR07065778.3,AABR07065789.1,AABR07065789.2,AABR07065789.3,AABR07065792.2,AABR07065798.1,AABR07065802.1,AABR07065814.2,AABR07065815.1,AABR07065815.2,AABR07065823.3,AABR07065827.1,AABR07065883.1,Igh-6,Ighg1
GO:0006955	immune response	biological_process	2.22018	0	84	AABR07027451.1,AABR07034736.1,AABR07051533.2,AABR07051535.1,AABR07051548.2,AABR07051675.1,AABR07051716.1,AABR07051731.1,AABR07056026.1,AABR07060792.1,AABR07060886.1,AABR07060944.1,AABR07060952.1,AABR07060953.1,AABR07060963.3,AABR07060971.1,AABR07060979.1,AABR07061005.2,AABR07061022.3,AABR07065645.1,AABR07065651.4,AABR07065651.8,AABR07065693.2,AABR07065693.3,AABR07065750.1,AABR07065750.2,AABR07065…
GO:0006958	complement activation, classical pathway	biological_process	8.87381	0	28	AABR07065645.1,AABR07065651.4,AABR07065651.8,AABR07065693.2,AABR07065693.3,AABR07065750.1,AABR07065750.2,AABR07065768.1,AABR07065768.3,AABR07065772.2,AABR07065772.4,AABR07065774.1,AABR07065778.3,AABR07065789.1,AABR07065789.2,AABR07065789.3,AABR07065792.2,AABR07065798.1,AABR07065802.1,AABR07065814.2,AABR07065815.1,AABR07065815.2,AABR07065823.3,AABR07065827.1,AABR07065883.1,Cfb,Igh-6,Ighg1
GO:0009617	response to bacterium	biological_process	3.48213	0	65	AABR07065645.1,AABR07065651.4,AABR07065651.8,AABR07065693.2,AABR07065693.3,AABR07065750.1,AABR07065750.2,AABR07065768.1,AABR07065768.3,AABR07065772.2,AABR07065772.4,AABR07065774.1,AABR07065778.3,AABR07065789.1,AABR07065789.2,AABR07065789.3,AABR07065792.2,AABR07065798.1,AABR07065802.1,AABR07065814.2,AABR07065815.1,AABR07065815.2,AABR07065823.3,AABR07065827.1,AABR07065883.1,Abcb1b,Adipoq,Alpl,C3,Ca…
GO:0009897	external side of plasma membrane	cellular_component	3.79001	0	38	AABR07065645.1,AABR07065651.4,AABR07065651.8,AABR07065693.2,AABR07065693.3,AABR07065750.1,AABR07065750.2,AABR07065768.1,AABR07065768.3,AABR07065772.2,AABR07065772.4,AABR07065774.1,AABR07065778.3,AABR07065789.1,AABR07065789.2,AABR07065789.3,AABR07065792.2,AABR07065798.1,AABR07065802.1,AABR07065814.2,AABR07065815.1,AABR07065815.2,AABR07065823.3,AABR07065827.1,AABR07065883.1,Cd19,Cd79b,Cd8a,Crlf1,Fg…
GO:0019814	immunoglobulin complex	cellular_component	9.68875	0	28	AABR07065645.1,AABR07065651.4,AABR07065651.8,AABR07065693.2,AABR07065693.3,AABR07065750.1,AABR07065750.2,AABR07065768.1,AABR07065768.3,AABR07065772.2,AABR07065772.4,AABR07065774.1,AABR07065778.3,AABR07065789.1,AABR07065789.2,AABR07065789.3,AABR07065792.2,AABR07065798.1,AABR07065802.1,AABR07065814.2,AABR07065815.1,AABR07065815.2,AABR07065823.3,AABR07065827.1,AABR07065883.1,Cd79b,Igh-6,Ighg1
GO:0034987	immunoglobulin receptor binding	molecular_function	9.15587	0	27	AABR07065645.1,AABR07065651.4,AABR07065651.8,AABR07065693.2,AABR07065693.3,AABR07065750.1,AABR07065750.2,AABR07065768.1,AABR07065768.3,AABR07065772.2,AABR07065772.4,AABR07065774.1,AABR07065778.3,AABR07065789.1,AABR07065789.2,AABR07065789.3,AABR07065792.2,AABR07065798.1,AABR07065802.1,AABR07065814.2,AABR07065815.1,AABR07065815.2,AABR07065823.3,AABR07065827.1,AABR07065883.1,Igh-6,Ighg1
GO:0042571	immunoglobulin complex, circulating	cellular_component	9.74029	0	27	AABR07065645.1,AABR07065651.4,AABR07065651.8,AABR07065693.2,AABR07065693.3,AABR07065750.1,AABR07065750.2,AABR07065768.1,AABR07065768.3,AABR07065772.2,AABR07065772.4,AABR07065774.1,AABR07065778.3,AABR07065789.1,AABR07065789.2,AABR07065789.3,AABR07065792.2,AABR07065798.1,AABR07065802.1,AABR07065814.2,AABR07065815.1,AABR07065815.2,AABR07065823.3,AABR07065827.1,AABR07065883.1,Igh-6,Ighg1
GO:0042742	defense response to bacterium	biological_process	4.62986	0	37	AABR07065645.1,AABR07065651.4,AABR07065651.8,AABR07065693.2,AABR07065693.3,AABR07065750.1,AABR07065750.2,AABR07065768.1,AABR07065768.3,AABR07065772.2,AABR07065772.4,AABR07065774.1,AABR07065778.3,AABR07065789.1,AABR07065789.2,AABR07065789.3,AABR07065792.2,AABR07065798.1,AABR07065802.1,AABR07065814.2,AABR07065815.1,AABR07065815.2,AABR07065823.3,AABR07065827.1,AABR07065883.1,Chga,Igh-6,Ighg1,Isg15,L…
GO:0043207	response to external biotic stimulus	biological_process	2.79264	0	70	AABR07065645.1,AABR07065651.4,AABR07065651.8,AABR07065693.2,AABR07065693.3,AABR07065750.1,AABR07065750.2,AABR07065768.1,AABR07065768.3,AABR07065772.2,AABR07065772.4,AABR07065774.1,AABR07065778.3,AABR07065789.1,AABR07065789.2,AABR07065789.3,AABR07065792.2,AABR07065798.1,AABR07065802.1,AABR07065814.2,AABR07065815.1,AABR07065815.2,AABR07065823.3,AABR07065827.1,AABR07065883.1,Abcb1b,Adipoq,Alpl,C3,Ca…
GO:0044421	extracellular region part	cellular_component	3.02852	0	137	AABR07027451.1,AABR07034736.1,AABR07051533.2,AABR07051535.1,AABR07051548.2,AABR07051675.1,AABR07051716.1,AABR07051731.1,AABR07056026.1,AABR07060792.1,AABR07060886.1,AABR07060944.1,AABR07060952.1,AABR07060953.1,AABR07060963.3,AABR07060971.1,AABR07060979.1,AABR07061005.2,AABR07061022.3,AABR07065645.1,AABR07065651.4,AABR07065651.8,AABR07065693.2,AABR07065693.3,AABR07065750.1,AABR07065750.2,AABR07065…
GO:0051707	response to other organism	biological_process	2.80916	0	70	AABR07065645.1,AABR07065651.4,AABR07065651.8,AABR07065693.2,AABR07065693.3,AABR07065750.1,AABR07065750.2,AABR07065768.1,AABR07065768.3,AABR07065772.2,AABR07065772.4,AABR07065774.1,AABR07065778.3,AABR07065789.1,AABR07065789.2,AABR07065789.3,AABR07065792.2,AABR07065798.1,AABR07065802.1,AABR07065814.2,AABR07065815.1,AABR07065815.2,AABR07065823.3,AABR07065827.1,AABR07065883.1,Abcb1b,Adipoq,Alpl,C3,Ca…
GO:0006959	humoral immune response	biological_process	5.70459	6.42e-11	36	AABR07065645.1,AABR07065651.4,AABR07065651.8,AABR07065693.2,AABR07065693.3,AABR07065750.1,AABR07065750.2,AABR07065768.1,AABR07065768.3,AABR07065772.2,AABR07065772.4,AABR07065774.1,AABR07065778.3,AABR07065789.1,AABR07065789.2,AABR07065789.3,AABR07065792.2,AABR07065798.1,AABR07065802.1,AABR07065814.2,AABR07065815.1,AABR07065815.2,AABR07065823.3,AABR07065827.1,AABR07065883.1,C3,C6,Cfb,Igh-6,Ighg1,Pg…
GO:0002455	humoral immune response mediated by circulating immunoglobulin	biological_process	8.32893	7.93e-11	28	AABR07065645.1,AABR07065651.4,AABR07065651.8,AABR07065693.2,AABR07065693.3,AABR07065750.1,AABR07065750.2,AABR07065768.1,AABR07065768.3,AABR07065772.2,AABR07065772.4,AABR07065774.1,AABR07065778.3,AABR07065789.1,AABR07065789.2,AABR07065789.3,AABR07065792.2,AABR07065798.1,AABR07065802.1,AABR07065814.2,AABR07065815.1,AABR07065815.2,AABR07065823.3,AABR07065827.1,AABR07065883.1,Cfb,Igh-6,Ighg1
GO:0003823	antigen binding	molecular_function	7.33887	1.24e-10	29	AABR07065645.1,AABR07065651.4,AABR07065651.8,AABR07065693.2,AABR07065693.3,AABR07065750.1,AABR07065750.2,AABR07065768.1,AABR07065768.3,AABR07065772.2,AABR07065772.4,AABR07065774.1,AABR07065778.3,AABR07065789.1,AABR07065789.2,AABR07065789.3,AABR07065792.2,AABR07065798.1,AABR07065802.1,AABR07065814.2,AABR07065815.1,AABR07065815.2,AABR07065823.3,AABR07065827.1,AABR07065883.1,Igh-6,Ighg1,RT1-CE3,RT1-…
GO:0010324	membrane invagination	biological_process	6.9816	1.84e-10	28	AABR07065645.1,AABR07065651.4,AABR07065651.8,AABR07065693.2,AABR07065693.3,AABR07065750.1,AABR07065750.2,AABR07065768.1,AABR07065768.3,AABR07065772.2,AABR07065772.4,AABR07065774.1,AABR07065778.3,AABR07065789.1,AABR07065789.2,AABR07065789.3,AABR07065792.2,AABR07065798.1,AABR07065802.1,AABR07065814.2,AABR07065815.1,AABR07065815.2,AABR07065823.3,AABR07065827.1,AABR07065883.1,C3,Igh-6,Ighg1
GO:0006911	phagocytosis, engulfment	biological_process	7.78277	2.18e-10	28	AABR07065645.1,AABR07065651.4,AABR07065651.8,AABR07065693.2,AABR07065693.3,AABR07065750.1,AABR07065750.2,AABR07065768.1,AABR07065768.3,AABR07065772.2,AABR07065772.4,AABR07065774.1,AABR07065778.3,AABR07065789.1,AABR07065789.2,AABR07065789.3,AABR07065792.2,AABR07065798.1,AABR07065802.1,AABR07065814.2,AABR07065815.1,AABR07065815.2,AABR07065823.3,AABR07065827.1,AABR07065883.1,C3,Igh-6,Ighg1
GO:0072376	protein activation cascade	biological_process	7.53569	2.18e-10	32	AABR07065645.1,AABR07065651.4,AABR07065651.8,AABR07065693.2,AABR07065693.3,AABR07065750.1,AABR07065750.2,AABR07065768.1,AABR07065768.3,AABR07065772.2,AABR07065772.4,AABR07065774.1,AABR07065778.3,AABR07065789.1,AABR07065789.2,AABR07065789.3,AABR07065792.2,AABR07065798.1,AABR07065802.1,AABR07065814.2,AABR07065815.1,AABR07065815.2,AABR07065823.3,AABR07065827.1,AABR07065883.1,C3,C6,Cfb,Fgg,Igh-6,Ighg1
GO:0099024	plasma membrane invagination	biological_process	7.30383	2.18e-10	28	AABR07065645.1,AABR07065651.4,AABR07065651.8,AABR07065693.2,AABR07065693.3,AABR07065750.1,AABR07065750.2,AABR07065768.1,AABR07065768.3,AABR07065772.2,AABR07065772.4,AABR07065774.1,AABR07065778.3,AABR07065789.1,AABR07065789.2,AABR07065789.3,AABR07065792.2,AABR07065798.1,AABR07065802.1,AABR07065814.2,AABR07065815.1,AABR07065815.2,AABR07065823.3,AABR07065827.1,AABR07065883.1,C3,Igh-6,Ighg1
GO:0006956	complement activation	biological_process	7.96386	2.18e-10	31	AABR07065645.1,AABR07065651.4,AABR07065651.8,AABR07065693.2,AABR07065693.3,AABR07065750.1,AABR07065750.2,AABR07065768.1,AABR07065768.3,AABR07065772.2,AABR07065772.4,AABR07065774.1,AABR07065778.3,AABR07065789.1,AABR07065789.2,AABR07065789.3,AABR07065792.2,AABR07065798.1,AABR07065802.1,AABR07065814.2,AABR07065815.1,AABR07065815.2,AABR07065823.3,AABR07065827.1,AABR07065883.1,C3,C6,Cfb,Igh-6,Ighg1
GO:0050853	B cell receptor signaling pathway	biological_process	7.68288	2.33e-10	29	AABR07065645.1,AABR07065651.4,AABR07065651.8,AABR07065693.2,AABR07065693.3,AABR07065750.1,AABR07065750.2,AABR07065768.1,AABR07065768.3,AABR07065772.2,AABR07065772.4,AABR07065774.1,AABR07065778.3,AABR07065789.1,AABR07065789.2,AABR07065789.3,AABR07065792.2,AABR07065798.1,AABR07065802.1,AABR07065814.2,AABR07065815.1,AABR07065815.2,AABR07065823.3,AABR07065827.1,AABR07065883.1,Cd19,Cd79b,Igh-6,Ighg1
GO:0050871	positive regulation of B cell activation	biological_process	6.12579	2.86e-10	28	AABR07065645.1,AABR07065651.4,AABR07065651.8,AABR07065693.2,AABR07065693.3,AABR07065750.1,AABR07065750.2,AABR07065768.1,AABR07065768.3,AABR07065772.2,AABR07065772.4,AABR07065774.1,AABR07065778.3,AABR07065789.1,AABR07065789.2,AABR07065789.3,AABR07065792.2,AABR07065798.1,AABR07065802.1,AABR07065814.2,AABR07065815.1,AABR07065815.2,AABR07065823.3,AABR07065827.1,AABR07065883.1,Igh-6,Ighg1,Tfrc
GO:0005576	extracellular region	cellular_component	2.87438	2.91e-10	163	AABR07027451.1,AABR07034736.1,AABR07051533.2,AABR07051535.1,AABR07051548.2,AABR07051675.1,AABR07051716.1,AABR07051731.1,AABR07056026.1,AABR07060792.1,AABR07060886.1,AABR07060944.1,AABR07060952.1,AABR07060953.1,AABR07060963.3,AABR07060971.1,AABR07060979.1,AABR07061005.2,AABR07061022.3,AABR07065645.1,AABR07065651.4,AABR07065651.8,AABR07065693.2,AABR07065693.3,AABR07065750.1,AABR07065750.2,AABR07065…
GO:0050864	regulation of B cell activation	biological_process	5.55912	2.91e-10	30	AABR07065645.1,AABR07065651.4,AABR07065651.8,AABR07065693.2,AABR07065693.3,AABR07065750.1,AABR07065750.2,AABR07065768.1,AABR07065768.3,AABR07065772.2,AABR07065772.4,AABR07065774.1,AABR07065778.3,AABR07065789.1,AABR07065789.2,AABR07065789.3,AABR07065792.2,AABR07065798.1,AABR07065802.1,AABR07065814.2,AABR07065815.1,AABR07065815.2,AABR07065823.3,AABR07065827.1,AABR07065883.1,Igh-6,Ighg1,Mzb1,Sfrp1,T…
GO:0016064	immunoglobulin mediated immune response	biological_process	6.05547	3.35e-10	30	AABR07065645.1,AABR07065651.4,AABR07065651.8,AABR07065693.2,AABR07065693.3,AABR07065750.1,AABR07065750.2,AABR07065768.1,AABR07065768.3,AABR07065772.2,AABR07065772.4,AABR07065774.1,AABR07065778.3,AABR07065789.1,AABR07065789.2,AABR07065789.3,AABR07065792.2,AABR07065798.1,AABR07065802.1,AABR07065814.2,AABR07065815.1,AABR07065815.2,AABR07065823.3,AABR07065827.1,AABR07065883.1,C3,Cfb,Igh-6,Ighg1,Tfrc
GO:0019724	B cell mediated immunity	biological_process	6.05547	3.35e-10	30	AABR07065645.1,AABR07065651.4,AABR07065651.8,AABR07065693.2,AABR07065693.3,AABR07065750.1,AABR07065750.2,AABR07065768.1,AABR07065768.3,AABR07065772.2,AABR07065772.4,AABR07065774.1,AABR07065778.3,AABR07065789.1,AABR07065789.2,AABR07065789.3,AABR07065792.2,AABR07065798.1,AABR07065802.1,AABR07065814.2,AABR07065815.1,AABR07065815.2,AABR07065823.3,AABR07065827.1,AABR07065883.1,C3,Cfb,Igh-6,Ighg1,Tfrc
GO:0008037	cell recognition	biological_process	5.36439	3.88e-10	28	AABR07065645.1,AABR07065651.4,AABR07065651.8,AABR07065693.2,AABR07065693.3,AABR07065750.1,AABR07065750.2,AABR07065768.1,AABR07065768.3,AABR07065772.2,AABR07065772.4,AABR07065774.1,AABR07065778.3,AABR07065789.1,AABR07065789.2,AABR07065789.3,AABR07065792.2,AABR07065798.1,AABR07065802.1,AABR07065814.2,AABR07065815.1,AABR07065815.2,AABR07065823.3,AABR07065827.1,AABR07065883.1,Igh-6,Ighg1,Vstm2l
GO:0009605	response to external stimulus	biological_process	2.0663	3.88e-10	124	AABR07065645.1,AABR07065651.4,AABR07065651.8,AABR07065693.2,AABR07065693.3,AABR07065750.1,AABR07065750.2,AABR07065768.1,AABR07065768.3,AABR07065772.2,AABR07065772.4,AABR07065774.1,AABR07065778.3,AABR07065789.1,AABR07065789.2,AABR07065789.3,AABR07065792.2,AABR07065798.1,AABR07065802.1,AABR07065814.2,AABR07065815.1,AABR07065815.2,AABR07065823.3,AABR07065827.1,AABR07065883.1,Abcb1b,Adipoq,Adrb3,Aldh…
GO:0050851	antigen receptor-mediated signaling pathway	biological_process	4.73171	4.37e-10	30	AABR07065645.1,AABR07065651.4,AABR07065651.8,AABR07065693.2,AABR07065693.3,AABR07065750.1,AABR07065750.2,AABR07065768.1,AABR07065768.3,AABR07065772.2,AABR07065772.4,AABR07065774.1,AABR07065778.3,AABR07065789.1,AABR07065789.2,AABR07065789.3,AABR07065792.2,AABR07065798.1,AABR07065802.1,AABR07065814.2,AABR07065815.1,AABR07065815.2,AABR07065823.3,AABR07065827.1,AABR07065883.1,Cd19,Cd79b,Dennd1b,Igh-6…
GO:0009607	response to biotic stimulus	biological_process	2.70358	5.99e-10	70	AABR07065645.1,AABR07065651.4,AABR07065651.8,AABR07065693.2,AABR07065693.3,AABR07065750.1,AABR07065750.2,AABR07065768.1,AABR07065768.3,AABR07065772.2,AABR07065772.4,AABR07065774.1,AABR07065778.3,AABR07065789.1,AABR07065789.2,AABR07065789.3,AABR07065792.2,AABR07065798.1,AABR07065802.1,AABR07065814.2,AABR07065815.1,AABR07065815.2,AABR07065823.3,AABR07065827.1,AABR07065883.1,Abcb1b,Adipoq,Alpl,C3,Ca…
GO:0098657	import into cell	biological_process	2.83034	1.06e-09	53	AABR07011057.2,AABR07065645.1,AABR07065651.4,AABR07065651.8,AABR07065693.2,AABR07065693.3,AABR07065750.1,AABR07065750.2,AABR07065768.1,AABR07065768.3,AABR07065772.2,AABR07065772.4,AABR07065774.1,AABR07065778.3,AABR07065789.1,AABR07065789.2,AABR07065789.3,AABR07065792.2,AABR07065798.1,AABR07065802.1,AABR07065814.2,AABR07065815.1,AABR07065815.2,AABR07065823.3,AABR07065827.1,AABR07065883.1,Adipoq,Am…
GO:0006909	phagocytosis	biological_process	4.59536	1.43e-09	29	AABR07065645.1,AABR07065651.4,AABR07065651.8,AABR07065693.2,AABR07065693.3,AABR07065750.1,AABR07065750.2,AABR07065768.1,AABR07065768.3,AABR07065772.2,AABR07065772.4,AABR07065774.1,AABR07065778.3,AABR07065789.1,AABR07065789.2,AABR07065789.3,AABR07065792.2,AABR07065798.1,AABR07065802.1,AABR07065814.2,AABR07065815.1,AABR07065815.2,AABR07065823.3,AABR07065827.1,AABR07065883.1,Adipoq,C3,Igh-6,Ighg1
GO:0002250	adaptive immune response	biological_process	3.63679	1.65e-09	37	AABR07065645.1,AABR07065651.4,AABR07065651.8,AABR07065693.2,AABR07065693.3,AABR07065750.1,AABR07065750.2,AABR07065768.1,AABR07065768.3,AABR07065772.2,AABR07065772.4,AABR07065774.1,AABR07065778.3,AABR07065789.1,AABR07065789.2,AABR07065789.3,AABR07065792.2,AABR07065798.1,AABR07065802.1,AABR07065814.2,AABR07065815.1,AABR07065815.2,AABR07065823.3,AABR07065827.1,AABR07065883.1,C3,Cd7,Cd8a,Cfb,Dennd1b,…
GO:0002764	immune response-regulating signaling pathway	biological_process	3.58484	2.86e-09	37	AABR07065645.1,AABR07065651.4,AABR07065651.8,AABR07065693.2,AABR07065693.3,AABR07065750.1,AABR07065750.2,AABR07065768.1,AABR07065768.3,AABR07065772.2,AABR07065772.4,AABR07065774.1,AABR07065778.3,AABR07065789.1,AABR07065789.2,AABR07065789.3,AABR07065792.2,AABR07065798.1,AABR07065802.1,AABR07065814.2,AABR07065815.1,AABR07065815.2,AABR07065823.3,AABR07065827.1,AABR07065883.1,Cd19,Cd79b,Dennd1b,Igh-6…
GO:0002757	immune response-activating signal transduction	biological_process	3.64413	3.32e-09	36	AABR07065645.1,AABR07065651.4,AABR07065651.8,AABR07065693.2,AABR07065693.3,AABR07065750.1,AABR07065750.2,AABR07065768.1,AABR07065768.3,AABR07065772.2,AABR07065772.4,AABR07065774.1,AABR07065778.3,AABR07065789.1,AABR07065789.2,AABR07065789.3,AABR07065792.2,AABR07065798.1,AABR07065802.1,AABR07065814.2,AABR07065815.1,AABR07065815.2,AABR07065823.3,AABR07065827.1,AABR07065883.1,Cd19,Cd79b,Dennd1b,Igh-6…
GO:0042113	B cell activation	biological_process	4.03398	3.38e-09	32	AABR07065645.1,AABR07065651.4,AABR07065651.8,AABR07065693.2,AABR07065693.3,AABR07065750.1,AABR07065750.2,AABR07065768.1,AABR07065768.3,AABR07065772.2,AABR07065772.4,AABR07065774.1,AABR07065778.3,AABR07065789.1,AABR07065789.2,AABR07065789.3,AABR07065792.2,AABR07065798.1,AABR07065802.1,AABR07065814.2,AABR07065815.1,AABR07065815.2,AABR07065823.3,AABR07065827.1,AABR07065883.1,Cd79b,Igh-6,Ighg1,Itm2a,…
GO:0002768	immune response-regulating cell surface receptor signaling pathway	biological_process	4.1387	3.43e-09	31	AABR07065645.1,AABR07065651.4,AABR07065651.8,AABR07065693.2,AABR07065693.3,AABR07065750.1,AABR07065750.2,AABR07065768.1,AABR07065768.3,AABR07065772.2,AABR07065772.4,AABR07065774.1,AABR07065778.3,AABR07065789.1,AABR07065789.2,AABR07065789.3,AABR07065792.2,AABR07065798.1,AABR07065802.1,AABR07065814.2,AABR07065815.1,AABR07065815.2,AABR07065823.3,AABR07065827.1,AABR07065883.1,Cd19,Cd79b,Dennd1b,Igh-6…
GO:0002429	immune response-activating cell surface receptor signaling pathway	biological_process	4.2038	4.98e-09	30	AABR07065645.1,AABR07065651.4,AABR07065651.8,AABR07065693.2,AABR07065693.3,AABR07065750.1,AABR07065750.2,AABR07065768.1,AABR07065768.3,AABR07065772.2,AABR07065772.4,AABR07065774.1,AABR07065778.3,AABR07065789.1,AABR07065789.2,AABR07065789.3,AABR07065792.2,AABR07065798.1,AABR07065802.1,AABR07065814.2,AABR07065815.1,AABR07065815.2,AABR07065823.3,AABR07065827.1,AABR07065883.1,Cd19,Cd79b,Dennd1b,Igh-6…
GO:0002253	activation of immune response	biological_process	3.30835	5.38e-09	40	AABR07065645.1,AABR07065651.4,AABR07065651.8,AABR07065693.2,AABR07065693.3,AABR07065750.1,AABR07065750.2,AABR07065768.1,AABR07065768.3,AABR07065772.2,AABR07065772.4,AABR07065774.1,AABR07065778.3,AABR07065789.1,AABR07065789.2,AABR07065789.3,AABR07065792.2,AABR07065798.1,AABR07065802.1,AABR07065814.2,AABR07065815.1,AABR07065815.2,AABR07065823.3,AABR07065827.1,AABR07065883.1,C3,C6,Cd19,Cd79b,Cfb,Den…
GO:0004252	serine-type endopeptidase activity	molecular_function	4.62418	5.38e-09	27	AABR07024139.1,Cela2a,Cela3b,Cfb,Cfi,Cma1,Ctrb1,Ctrc,Ctrl,Hp,Klk8,LOC286960,LOC312273,Mcpt1,Mcpt1l4,Mcpt8,Mcpt8l2,Mmp8,Pamr1,Plg,Prss1,Prss2,Prss3,Prss3b,Tmprss5,Try5
GO:0098552	side of membrane	cellular_component	3.0701	5.91e-09	44	AABR07065645.1,AABR07065651.4,AABR07065651.8,AABR07065693.2,AABR07065693.3,AABR07065750.1,AABR07065750.2,AABR07065768.1,AABR07065768.3,AABR07065772.2,AABR07065772.4,AABR07065774.1,AABR07065778.3,AABR07065789.1,AABR07065789.2,AABR07065789.3,AABR07065792.2,AABR07065798.1,AABR07065802.1,AABR07065814.2,AABR07065815.1,AABR07065815.2,AABR07065823.3,AABR07065827.1,AABR07065883.1,Cd19,Cd79b,Cd8a,Crlf1,Dm…
GO:0008236	serine-type peptidase activity	molecular_function	4.39582	7.49e-09	28	AABR07024139.1,Cela2a,Cela3b,Cfb,Cfi,Cma1,Ctrb1,Ctrc,Ctrl,Dpp10,Hp,Klk8,LOC286960,LOC312273,Mcpt1,Mcpt1l4,Mcpt8,Mcpt8l2,Mmp8,Pamr1,Plg,Prss1,Prss2,Prss3,Prss3b,Tmprss5,Try5
GO:0017171	serine hydrolase activity	molecular_function	4.3159	1.13e-08	28	AABR07024139.1,Cela2a,Cela3b,Cfb,Cfi,Cma1,Ctrb1,Ctrc,Ctrl,Dpp10,Hp,Klk8,LOC286960,LOC312273,Mcpt1,Mcpt1l4,Mcpt8,Mcpt8l2,Mmp8,Pamr1,Plg,Prss1,Prss2,Prss3,Prss3b,Tmprss5,Try5
GO:0002252	immune effector process	biological_process	2.73473	1.71e-08	50	AABR07065645.1,AABR07065651.4,AABR07065651.8,AABR07065693.2,AABR07065693.3,AABR07065750.1,AABR07065750.2,AABR07065768.1,AABR07065768.3,AABR07065772.2,AABR07065772.4,AABR07065774.1,AABR07065778.3,AABR07065789.1,AABR07065789.2,AABR07065789.3,AABR07065792.2,AABR07065798.1,AABR07065802.1,AABR07065814.2,AABR07065815.1,AABR07065815.2,AABR07065823.3,AABR07065827.1,AABR07065883.1,C3,C6,Cbl,Cd8a,Cfb,Chga,…
GO:0009986	cell surface	cellular_component	2.57187	2.97e-08	54	AABR07065645.1,AABR07065651.4,AABR07065651.8,AABR07065693.2,AABR07065693.3,AABR07065750.1,AABR07065750.2,AABR07065768.1,AABR07065768.3,AABR07065772.2,AABR07065772.4,AABR07065774.1,AABR07065778.3,AABR07065789.1,AABR07065789.2,AABR07065789.3,AABR07065792.2,AABR07065798.1,AABR07065802.1,AABR07065814.2,AABR07065815.1,AABR07065815.2,AABR07065823.3,AABR07065827.1,AABR07065883.1,Adamts15,Adipoq,Cd19,Cd7…
GO:0006897	endocytosis	biological_process	2.75599	7.53e-08	46	AABR07011057.2,AABR07065645.1,AABR07065651.4,AABR07065651.8,AABR07065693.2,AABR07065693.3,AABR07065750.1,AABR07065750.2,AABR07065768.1,AABR07065768.3,AABR07065772.2,AABR07065772.4,AABR07065774.1,AABR07065778.3,AABR07065789.1,AABR07065789.2,AABR07065789.3,AABR07065792.2,AABR07065798.1,AABR07065802.1,AABR07065814.2,AABR07065815.1,AABR07065815.2,AABR07065823.3,AABR07065827.1,AABR07065883.1,Adipoq,Am…
GO:0098542	defense response to other organism	biological_process	3.01256	1.31e-07	39	AABR07065645.1,AABR07065651.4,AABR07065651.8,AABR07065693.2,AABR07065693.3,AABR07065750.1,AABR07065750.2,AABR07065768.1,AABR07065768.3,AABR07065772.2,AABR07065772.4,AABR07065774.1,AABR07065778.3,AABR07065789.1,AABR07065789.2,AABR07065789.3,AABR07065792.2,AABR07065798.1,AABR07065802.1,AABR07065814.2,AABR07065815.1,AABR07065815.2,AABR07065823.3,AABR07065827.1,AABR07065883.1,Chga,Igh-6,Ighg1,Isg15,L…
GO:0004497	monooxygenase activity	molecular_function	5.29853	1.41e-07	20	Agmo,Akr1c13,Akr1c19,Akr1cl,Cmahp,Cyp11b2,Cyp1b1,Cyp21a1,Cyp27a1,Cyp2d2,Cyp2d5,Cyp2e1,Cyp2j10,Cyp2j4,Cyp2w1,Cyp51,Cyp8b1,Fmo1,LOC108348266,Sqle
GO:0002376	immune system process	biological_process	1.78212	2.87e-07	106	AABR07027451.1,AABR07034736.1,AABR07051533.2,AABR07051535.1,AABR07051548.2,AABR07051675.1,AABR07051716.1,AABR07051731.1,AABR07056026.1,AABR07060792.1,AABR07060886.1,AABR07060944.1,AABR07060952.1,AABR07060953.1,AABR07060963.3,AABR07060971.1,AABR07060979.1,AABR07061005.2,AABR07061022.3,AABR07065645.1,AABR07065651.4,AABR07065651.8,AABR07065693.2,AABR07065693.3,AABR07065750.1,AABR07065750.2,AABR07065…
GO:0016705	oxidoreductase activity, acting on paired donors, with incorporation or reduction of molecular oxygen	molecular_function	4.19513	3.95e-07	24	Agmo,Akr1c13,Akr1c19,Akr1cl,Cmahp,Cyp11b2,Cyp1b1,Cyp21a1,Cyp27a1,Cyp2d2,Cyp2d5,Cyp2e1,Cyp2j10,Cyp2j4,Cyp2w1,Cyp51,Cyp8b1,Erp27,Fmo1,LOC108348266,Scd,Scd2,Sqle,Tet3
GO:0051249	regulation of lymphocyte activation	biological_process	2.97752	7.38e-07	36	AABR07065645.1,AABR07065651.4,AABR07065651.8,AABR07065693.2,AABR07065693.3,AABR07065750.1,AABR07065750.2,AABR07065768.1,AABR07065768.3,AABR07065772.2,AABR07065772.4,AABR07065774.1,AABR07065778.3,AABR07065789.1,AABR07065789.2,AABR07065789.3,AABR07065792.2,AABR07065798.1,AABR07065802.1,AABR07065814.2,AABR07065815.1,AABR07065815.2,AABR07065823.3,AABR07065827.1,AABR07065883.1,Igh-6,Ighg1,Mzb1,Pde5a,P…
GO:0050778	positive regulation of immune response	biological_process	2.59942	9.69e-07	44	AABR07065645.1,AABR07065651.4,AABR07065651.8,AABR07065693.2,AABR07065693.3,AABR07065750.1,AABR07065750.2,AABR07065768.1,AABR07065768.3,AABR07065772.2,AABR07065772.4,AABR07065774.1,AABR07065778.3,AABR07065789.1,AABR07065789.2,AABR07065789.3,AABR07065792.2,AABR07065798.1,AABR07065802.1,AABR07065814.2,AABR07065815.1,AABR07065815.2,AABR07065823.3,AABR07065827.1,AABR07065883.1,C3,C6,Cd19,Cd79b,Cfb,Den…
GO:0048583	regulation of response to stimulus	biological_process	1.55372	1.09e-06	149	AABR07065645.1,AABR07065651.4,AABR07065651.8,AABR07065693.2,AABR07065693.3,AABR07065750.1,AABR07065750.2,AABR07065768.1,AABR07065768.3,AABR07065772.2,AABR07065772.4,AABR07065774.1,AABR07065778.3,AABR07065789.1,AABR07065789.2,AABR07065789.3,AABR07065792.2,AABR07065798.1,AABR07065802.1,AABR07065814.2,AABR07065815.1,AABR07065815.2,AABR07065823.3,AABR07065827.1,AABR07065883.1,Abcb1b,Adamtsl2,Adipoq,A…
GO:0051251	positive regulation of lymphocyte activation	biological_process	3.39106	1.24e-06	29	AABR07065645.1,AABR07065651.4,AABR07065651.8,AABR07065693.2,AABR07065693.3,AABR07065750.1,AABR07065750.2,AABR07065768.1,AABR07065768.3,AABR07065772.2,AABR07065772.4,AABR07065774.1,AABR07065778.3,AABR07065789.1,AABR07065789.2,AABR07065789.3,AABR07065792.2,AABR07065798.1,AABR07065802.1,AABR07065814.2,AABR07065815.1,AABR07065815.2,AABR07065823.3,AABR07065827.1,AABR07065883.1,Igh-6,Ighg1,Tfrc,Zbtb16
GO:0002694	regulation of leukocyte activation	biological_process	2.76677	1.24e-06	39	AABR07065645.1,AABR07065651.4,AABR07065651.8,AABR07065693.2,AABR07065693.3,AABR07065750.1,AABR07065750.2,AABR07065768.1,AABR07065768.3,AABR07065772.2,AABR07065772.4,AABR07065774.1,AABR07065778.3,AABR07065789.1,AABR07065789.2,AABR07065789.3,AABR07065792.2,AABR07065798.1,AABR07065802.1,AABR07065814.2,AABR07065815.1,AABR07065815.2,AABR07065823.3,AABR07065827.1,AABR07065883.1,Igh-6,Ighg1,Lbp,Ldlr,Mzb…
GO:0050865	regulation of cell activation	biological_process	2.67539	2e-06	40	AABR07065645.1,AABR07065651.4,AABR07065651.8,AABR07065693.2,AABR07065693.3,AABR07065750.1,AABR07065750.2,AABR07065768.1,AABR07065768.3,AABR07065772.2,AABR07065772.4,AABR07065774.1,AABR07065778.3,AABR07065789.1,AABR07065789.2,AABR07065789.3,AABR07065792.2,AABR07065798.1,AABR07065802.1,AABR07065814.2,AABR07065815.1,AABR07065815.2,AABR07065823.3,AABR07065827.1,AABR07065883.1,Fgg,Igh-6,Ighg1,Lbp,Ldlr…
GO:0050776	regulation of immune response	biological_process	2.40075	2.29e-06	48	AABR07065645.1,AABR07065651.4,AABR07065651.8,AABR07065693.2,AABR07065693.3,AABR07065750.1,AABR07065750.2,AABR07065768.1,AABR07065768.3,AABR07065772.2,AABR07065772.4,AABR07065774.1,AABR07065778.3,AABR07065789.1,AABR07065789.2,AABR07065789.3,AABR07065792.2,AABR07065798.1,AABR07065802.1,AABR07065814.2,AABR07065815.1,AABR07065815.2,AABR07065823.3,AABR07065827.1,AABR07065883.1,C3,C6,Cd19,Cd79b,Cfb,Den…
GO:0048584	positive regulation of response to stimulus	biological_process	1.76277	2.34e-06	97	AABR07065645.1,AABR07065651.4,AABR07065651.8,AABR07065693.2,AABR07065693.3,AABR07065750.1,AABR07065750.2,AABR07065768.1,AABR07065768.3,AABR07065772.2,AABR07065772.4,AABR07065774.1,AABR07065778.3,AABR07065789.1,AABR07065789.2,AABR07065789.3,AABR07065792.2,AABR07065798.1,AABR07065802.1,AABR07065814.2,AABR07065815.1,AABR07065815.2,AABR07065823.3,AABR07065827.1,AABR07065883.1,Abcb1b,Adipoq,Adrb3,Ar,B…
GO:0042493	response to drug	biological_process	2.0802	3.15e-06	63	Abcb1b,Adcy1,Adipoq,Aldh1a1,Aldh3a1,Amn,Aqp5,Atp1a2,Atp1a3,Car3,Cbl,Ccna2,Ccnb1,Chrnb4,Cryaa,Cyp1b1,Cyp2d2,Cyp2e1,Cyp2j10,Cyp2j4,Cyp2w1,Fabp1,Fbxo32,Fgfr2,Gata4,Gsta4,Hcn3,Hmgcs1,Htr1b,Kcnh2,LOC100911440,LOC103694380,Lcn2,Ncoa2,Nefl,Ngb,Nppc,Pklr,Ppargc1a,Ppp1r14a,Prkaa2,Prss1,Reg1a,Rgs9,Ryr2,S100a8,Sfrp1,Slc22a1,Slc22a3,Slc7a10,Slc7a11,Slc8a1,Slit3,Sncg,Sod2,Sox9,Srd5a1,Sst,Syt1,Tacr2,Tfrc,Tnf,T…
GO:0007166	cell surface receptor signaling pathway	biological_process	1.69633	3.31e-06	106	AABR07065645.1,AABR07065651.4,AABR07065651.8,AABR07065693.2,AABR07065693.3,AABR07065750.1,AABR07065750.2,AABR07065768.1,AABR07065768.3,AABR07065772.2,AABR07065772.4,AABR07065774.1,AABR07065778.3,AABR07065789.1,AABR07065789.2,AABR07065789.3,AABR07065792.2,AABR07065798.1,AABR07065802.1,AABR07065814.2,AABR07065815.1,AABR07065815.2,AABR07065823.3,AABR07065827.1,AABR07065883.1,Adamts15,Adamtsl2,Adipoq…
GO:0002696	positive regulation of leukocyte activation	biological_process	3.13021	3.86e-06	30	AABR07065645.1,AABR07065651.4,AABR07065651.8,AABR07065693.2,AABR07065693.3,AABR07065750.1,AABR07065750.2,AABR07065768.1,AABR07065768.3,AABR07065772.2,AABR07065772.4,AABR07065774.1,AABR07065778.3,AABR07065789.1,AABR07065789.2,AABR07065789.3,AABR07065792.2,AABR07065798.1,AABR07065802.1,AABR07065814.2,AABR07065815.1,AABR07065815.2,AABR07065823.3,AABR07065827.1,AABR07065883.1,Igh-6,Ighg1,Lbp,Tfrc,Zbt…
GO:0050867	positive regulation of cell activation	biological_process	3.05501	6.54e-06	30	AABR07065645.1,AABR07065651.4,AABR07065651.8,AABR07065693.2,AABR07065693.3,AABR07065750.1,AABR07065750.2,AABR07065768.1,AABR07065768.3,AABR07065772.2,AABR07065772.4,AABR07065774.1,AABR07065778.3,AABR07065789.1,AABR07065789.2,AABR07065789.3,AABR07065792.2,AABR07065798.1,AABR07065802.1,AABR07065814.2,AABR07065815.1,AABR07065815.2,AABR07065823.3,AABR07065827.1,AABR07065883.1,Igh-6,Ighg1,Lbp,Tfrc,Zbt…
GO:0006936	muscle contraction	biological_process	3.4462	8.14e-06	25	Actn2,Ank2,Atp1a2,Atp1a3,Cacna2d1,Chrnb4,Dmd,Gata4,Kcnd3,Kcne5,Kcnh2,LOC103694380,Myl1,Myocd,Myom1,Nmu,Npnt,Pde5a,Ryr2,Scn7a,Slc8a1,Tacr2,Tmod2,Tnf,Trim63
GO:0002377	immunoglobulin production	biological_process	3.66171	8.75e-06	23	AABR07027451.1,AABR07034736.1,AABR07051533.2,AABR07051535.1,AABR07051548.2,AABR07051675.1,AABR07051716.1,AABR07051731.1,AABR07056026.1,AABR07060792.1,AABR07060886.1,AABR07060944.1,AABR07060952.1,AABR07060953.1,AABR07060963.3,AABR07060971.1,AABR07060979.1,AABR07061005.2,AABR07061022.3,AC109901.2,Itm2a,Mzb1,Tfrc
GO:0051704	multi-organism process	biological_process	1.72521	1.18e-05	93	A1cf,AABR07040412.1,AABR07065645.1,AABR07065651.4,AABR07065651.8,AABR07065693.2,AABR07065693.3,AABR07065750.1,AABR07065750.2,AABR07065768.1,AABR07065768.3,AABR07065772.2,AABR07065772.4,AABR07065774.1,AABR07065778.3,AABR07065789.1,AABR07065789.2,AABR07065789.3,AABR07065792.2,AABR07065798.1,AABR07065802.1,AABR07065814.2,AABR07065815.1,AABR07065815.2,AABR07065823.3,AABR07065827.1,AABR07065883.1,Abcb…
GO:0001775	cell activation	biological_process	2.1754	1.65e-05	51	AABR07065645.1,AABR07065651.4,AABR07065651.8,AABR07065693.2,AABR07065693.3,AABR07065750.1,AABR07065750.2,AABR07065768.1,AABR07065768.3,AABR07065772.2,AABR07065772.4,AABR07065774.1,AABR07065778.3,AABR07065789.1,AABR07065789.2,AABR07065789.3,AABR07065792.2,AABR07065798.1,AABR07065802.1,AABR07065814.2,AABR07065815.1,AABR07065815.2,AABR07065823.3,AABR07065827.1,AABR07065883.1,Cbl,Cd79b,Cd8a,Chga,Fgg,…
GO:0008202	steroid metabolic process	biological_process	3.5867	2.3e-05	22	Akr1c13,Akr1c19,Akr1cl,Calb1,Cyb5r2,Cyp1b1,Cyp2e1,Cyp51,Dhcr7,Ephx2,Fgf23,Hmgcs1,Hmgcs2,Ldlr,Lss,Nr1d1,Ppargc1a,Scd,Sqle,Srd5a1,Sult1a1,Timp1
GO:0006952	defense response	biological_process	1.93181	2.5e-05	65	AABR07065645.1,AABR07065651.4,AABR07065651.8,AABR07065693.2,AABR07065693.3,AABR07065750.1,AABR07065750.2,AABR07065768.1,AABR07065768.3,AABR07065772.2,AABR07065772.4,AABR07065774.1,AABR07065778.3,AABR07065789.1,AABR07065789.2,AABR07065789.3,AABR07065792.2,AABR07065798.1,AABR07065802.1,AABR07065814.2,AABR07065815.1,AABR07065815.2,AABR07065823.3,AABR07065827.1,AABR07065883.1,Adipoq,Ash1l,C3,Cd8a,Chg…
GO:0043169	cation binding	molecular_function	1.50866	4.4e-05	132	AABR07058539.1,Acan,Acsm5,Actn2,Adamts15,Adcy1,Agmo,Alpl,Anxa13,Ar,Asap2,Ash1l,Aspn,Atp1a2,Atp1a3,Atp2b3,Atp2b4,Cacna1e,Calb1,Calb2,Car11,Car3,Cbl,Cdh6,Chrnb4,Col11a1,Cpa1,Cpa2,Cpa3,Cpb1,Cpeb1,Cracr2a,Creld2,Cryaa,Cyp11b2,Cyp1b1,Cyp21a1,Cyp27a1,Cyp2d2,Cyp2d5,Cyp2e1,Cyp2j10,Cyp2j4,Cyp2w1,Cyp51,Cyp8b1,Dlk1,Dmd,Ephx2,Fat4,Fen1,Fgg,Foxp2,Gata4,Hhip,Htr1b,Itga1,Itga7,Itln1,Kcnd3,Kcnip1,Kmt2a,LOC103689…
GO:0046872	metal ion binding	molecular_function	1.51523	4.83e-05	129	AABR07058539.1,Acan,Acsm5,Actn2,Adamts15,Adcy1,Agmo,Alpl,Anxa13,Ar,Asap2,Ash1l,Aspn,Atp1a2,Atp1a3,Atp2b3,Atp2b4,Cacna1e,Calb1,Calb2,Car11,Car3,Cbl,Cdh6,Col11a1,Cpa1,Cpa2,Cpa3,Cpb1,Cpeb1,Cracr2a,Creld2,Cryaa,Cyp11b2,Cyp1b1,Cyp21a1,Cyp27a1,Cyp2d2,Cyp2d5,Cyp2e1,Cyp2j10,Cyp2j4,Cyp2w1,Cyp51,Cyp8b1,Dlk1,Dmd,Ephx2,Fat4,Fen1,Fgg,Foxp2,Gata4,Hhip,Itga1,Itga7,Itln1,Kcnd3,Kcnip1,Kmt2a,LOC103690163,LOC103694…
GO:0045087	innate immune response	biological_process	2.36163	6.2e-05	39	AABR07065645.1,AABR07065651.4,AABR07065651.8,AABR07065693.2,AABR07065693.3,AABR07065750.1,AABR07065750.2,AABR07065768.1,AABR07065768.3,AABR07065772.2,AABR07065772.4,AABR07065774.1,AABR07065778.3,AABR07065789.1,AABR07065789.2,AABR07065789.3,AABR07065792.2,AABR07065798.1,AABR07065802.1,AABR07065814.2,AABR07065815.1,AABR07065815.2,AABR07065823.3,AABR07065827.1,AABR07065883.1,Igh-6,Ighg1,Isg15,LOC103…
GO:0002682	regulation of immune system process	biological_process	1.90786	6.97e-05	62	AABR07065645.1,AABR07065651.4,AABR07065651.8,AABR07065693.2,AABR07065693.3,AABR07065750.1,AABR07065750.2,AABR07065768.1,AABR07065768.3,AABR07065772.2,AABR07065772.4,AABR07065774.1,AABR07065778.3,AABR07065789.1,AABR07065789.2,AABR07065789.3,AABR07065792.2,AABR07065798.1,AABR07065802.1,AABR07065814.2,AABR07065815.1,AABR07065815.2,AABR07065823.3,AABR07065827.1,AABR07065883.1,Adipoq,C3,C6,Cd19,Cd79b,…
GO:0003012	muscle system process	biological_process	2.82589	7.54e-05	28	Actn2,Ank2,Atp1a2,Atp1a3,Atp2b4,Cacna2d1,Chrnb4,Dmd,Fbxo32,Gata4,Kcnd3,Kcne5,Kcnh2,LOC103694380,Myl1,Myocd,Myom1,Nmu,Npnt,Pde5a,Ppargc1a,Ryr2,Scn7a,Slc8a1,Tacr2,Tmod2,Tnf,Trim63
GO:0045321	leukocyte activation	biological_process	2.17067	8.6e-05	45	AABR07065645.1,AABR07065651.4,AABR07065651.8,AABR07065693.2,AABR07065693.3,AABR07065750.1,AABR07065750.2,AABR07065768.1,AABR07065768.3,AABR07065772.2,AABR07065772.4,AABR07065774.1,AABR07065778.3,AABR07065789.1,AABR07065789.2,AABR07065789.3,AABR07065792.2,AABR07065798.1,AABR07065802.1,AABR07065814.2,AABR07065815.1,AABR07065815.2,AABR07065823.3,AABR07065827.1,AABR07065883.1,Cbl,Cd79b,Cd8a,Chga,Igh-…
GO:0046649	lymphocyte activation	biological_process	2.28739	9.5e-05	40	AABR07065645.1,AABR07065651.4,AABR07065651.8,AABR07065693.2,AABR07065693.3,AABR07065750.1,AABR07065750.2,AABR07065768.1,AABR07065768.3,AABR07065772.2,AABR07065772.4,AABR07065774.1,AABR07065778.3,AABR07065789.1,AABR07065789.2,AABR07065789.3,AABR07065792.2,AABR07065798.1,AABR07065802.1,AABR07065814.2,AABR07065815.1,AABR07065815.2,AABR07065823.3,AABR07065827.1,AABR07065883.1,Cd79b,Cd8a,Igh-6,Ighg1,I…
GO:0002684	positive regulation of immune system process	biological_process	2.05519	0.000101855	50	AABR07065645.1,AABR07065651.4,AABR07065651.8,AABR07065693.2,AABR07065693.3,AABR07065750.1,AABR07065750.2,AABR07065768.1,AABR07065768.3,AABR07065772.2,AABR07065772.4,AABR07065774.1,AABR07065778.3,AABR07065789.1,AABR07065789.2,AABR07065789.3,AABR07065792.2,AABR07065798.1,AABR07065802.1,AABR07065814.2,AABR07065815.1,AABR07065815.2,AABR07065823.3,AABR07065827.1,AABR07065883.1,C3,C6,Cd19,Cd79b,Cfb,Cxc…
GO:0046914	transition metal ion binding	molecular_function	1.95975	0.000101855	56	AABR07058539.1,Adamts15,Agmo,Ar,Calb1,Car11,Car3,Cpa1,Cpa2,Cpa3,Cpb1,Cyp11b2,Cyp1b1,Cyp21a1,Cyp27a1,Cyp2d2,Cyp2d5,Cyp2e1,Cyp2j10,Cyp2j4,Cyp2w1,Cyp51,Cyp8b1,Dmd,Fen1,Gata4,Hhip,Kmt2a,LOC103694874,LOC108348118,LOC108348266,Lcn2,Lnpep,Mib1,Mmp8,Mmp9,Nr1d1,Nr1d2,Nr3c2,Pglyrp1,Rorc,S100a8,S100a9,S100b,S100g,Scd,Scd2,Sod2,Tet3,Timp1,Tk1,Tnks,Trhde,Trim15,Trim63,Zfhx3
GO:0044459	plasma membrane part	cellular_component	1.59449	0.000109583	101	AABR07065645.1,AABR07065651.4,AABR07065651.8,AABR07065693.2,AABR07065693.3,AABR07065750.1,AABR07065750.2,AABR07065768.1,AABR07065768.3,AABR07065772.2,AABR07065772.4,AABR07065774.1,AABR07065778.3,AABR07065789.1,AABR07065789.2,AABR07065789.3,AABR07065792.2,AABR07065798.1,AABR07065802.1,AABR07065814.2,AABR07065815.1,AABR07065815.2,AABR07065823.3,AABR07065827.1,AABR07065883.1,Abcb1b,Actn2,Adcy1,Adora…
GO:0007586	digestion	biological_process	4.74749	0.000111135	14	Abcb1b,Adm2,Aqp5,Clps,Fabp1,LOC286960,LOC312273,Ldlr,Nmu,Pbld1,Pnlip,Prss1,Prss2,Sox9
GO:0002440	production of molecular mediator of immune response	biological_process	2.95389	0.000119635	25	AABR07027451.1,AABR07034736.1,AABR07051533.2,AABR07051535.1,AABR07051548.2,AABR07051675.1,AABR07051716.1,AABR07051731.1,AABR07056026.1,AABR07060792.1,AABR07060886.1,AABR07060944.1,AABR07060952.1,AABR07060953.1,AABR07060963.3,AABR07060971.1,AABR07060979.1,AABR07061005.2,AABR07061022.3,AC109901.2,Chga,Dennd1b,Itm2a,Mzb1,Tfrc
GO:0008015	blood circulation	biological_process	2.62196	0.00013351	30	Adipoq,Adm2,Adrb3,Ank2,Ar,Atp1a2,Atp1a3,Atp2b4,Cacna2d1,Cpa3,Dmd,Fgg,Gata4,Htr1b,Itga1,Kcnd3,Kcne5,Kcnh2,Kng1,Myl1,Nmu,Nppc,Pde5a,Pomc,Ryr2,S100a1,Slc8a1,Sod2,Sult1a1,Tacr2
GO:0070011	peptidase activity, acting on L-amino acid peptides	molecular_function	2.21391	0.000146344	41	AABR07024139.1,Adamdec1,Adamts15,Cela2a,Cela3b,Cfb,Cfi,Cma1,Cpa1,Cpa2,Cpa3,Cpb1,Ctrb1,Ctrc,Ctrl,Dpp10,Hp,Klk8,LOC103694874,LOC108348118,LOC286960,LOC312273,Lnpep,Mcpt1,Mcpt1l4,Mcpt8,Mcpt8l2,Mmp8,Mmp9,Pamr1,Plg,Prss1,Prss2,Prss3,Prss3b,Sfrp1,Tmprss5,Trhde,Try5,Usp18
GO:1901700	response to oxygen-containing compound	biological_process	1.7201	0.000149959	77	Abcb1b,Actn2,Adipoq,Akap6,Aldh3a1,Alpl,Aqp8,Ar,Atp1a2,Atp1a3,Atp2b4,Birc5,Cacna2d1,Car3,Cbl,Ccna2,Ccnb1,Cfb,Cma1,Col4a3,Cpeb1,Cpeb4,Cryaa,Cyp1b1,Cyp2e1,Dennd4c,Dmd,Fabp1,Fbxo32,Fgf23,Fgfr2,Fmo1,Foxp2,Gata4,Gdf15,Hcn3,Hmgcs1,Hsd17b2,Htr1b,Kiaa0408L,LOC103694380,Lbp,Lcn2,Ldlr,Ltk,Mmp9,Mpo,Mzb1,Ncoa2,Nefl,Nppc,Nr1d1,Ntrk2,Phip,Pklr,Pla2g1b,Ppargc1a,Prkaa2,Reg1a,Rgs9,Rorc,Ryr2,S100a8,Scd,Sfrp1,Slc30a…
GO:0004175	endopeptidase activity	molecular_function	2.46487	0.000153465	33	AABR07024139.1,Adamdec1,Adamts15,Cela2a,Cela3b,Cfb,Cfi,Cma1,Ctrb1,Ctrc,Ctrl,Hp,Klk8,LOC103694874,LOC286960,LOC312273,Mcpt1,Mcpt1l4,Mcpt8,Mcpt8l2,Mmp8,Mmp9,Pamr1,Plg,Prss1,Prss2,Prss3,Prss3b,Sfrp1,Tmprss5,Try5,Usp18
GO:0033993	response to lipid	biological_process	1.96852	0.000159308	53	AABR07031756.2,Abcb1b,Adipoq,Aldh3a1,Alpl,Ar,Atp1a2,Atp1a3,Cbl,Ccna2,Ccnb1,Cfb,Cpeb1,Cryaa,Ephx1,Fbxo32,Fgf23,Fgfr2,Fmo1,Foxp2,Gata4,Hmgcs1,Hsd17b2,Htr1b,LOC103694380,Lbp,Lcn2,Ldlr,Ltk,Mpo,Ncoa2,Nefl,Nr1d1,Nr1d2,Ntrk2,Ppargc1a,Prkaa2,Rgs9,Rorc,S100a8,S100b,Scd,Sfrp1,Slit3,Sod2,Sox9,Srd5a1,Sst,Sult1a1,Tnf,Trh,Trim63
GO:0050896	response to stimulus	biological_process	1.21484	0.000164028	313	AABR07011057.2,AABR07027451.1,AABR07031756.2,AABR07034736.1,AABR07051533.2,AABR07051535.1,AABR07051548.2,AABR07051675.1,AABR07051716.1,AABR07051731.1,AABR07056026.1,AABR07060792.1,AABR07060886.1,AABR07060944.1,AABR07060952.1,AABR07060953.1,AABR07060963.3,AABR07060971.1,AABR07060979.1,AABR07061005.2,AABR07061022.3,AABR07065645.1,AABR07065651.4,AABR07065651.8,AABR07065693.2,AABR07065693.3,AABR07065…
GO:0008233	peptidase activity	molecular_function	2.17111	0.000170029	42	AABR07024139.1,Adamdec1,Adamts15,Adamtsl2,Cela2a,Cela3b,Cfb,Cfi,Cma1,Cpa1,Cpa2,Cpa3,Cpb1,Ctrb1,Ctrc,Ctrl,Dpp10,Hp,Klk8,LOC103694874,LOC108348118,LOC286960,LOC312273,Lnpep,Mcpt1,Mcpt1l4,Mcpt8,Mcpt8l2,Mmp8,Mmp9,Pamr1,Plg,Prss1,Prss2,Prss3,Prss3b,Sfrp1,Tmprss5,Trhde,Try5,Usp18
GO:0071872	cellular response to epinephrine stimulus	biological_process	18.8392	0.000181653	5	Adipoq,Atp2b4,Pklr,Ryr2,Srd5a1
GO:0071871	response to epinephrine	biological_process	13.5642	0.000183133	6	Adipoq,Atp2b4,Pklr,Ppargc1a,Ryr2,Srd5a1
GO:0003013	circulatory system process	biological_process	2.56899	0.000183133	30	Adipoq,Adm2,Adrb3,Ank2,Ar,Atp1a2,Atp1a3,Atp2b4,Cacna2d1,Cpa3,Dmd,Fgg,Gata4,Htr1b,Itga1,Kcnd3,Kcne5,Kcnh2,Kng1,Myl1,Nmu,Nppc,Pde5a,Pomc,Ryr2,S100a1,Slc8a1,Sod2,Sult1a1,Tacr2
GO:0030018	Z disc	cellular_component	4.74019	0.000234968	13	Actn2,Atp2b4,Dmd,Fbxl22,Fbxo32,Myom1,Myoz1,Ryr2,Ryr3,S100a1,Slc8a1,Synpo2,Trim63
GO:0055114	oxidation-reduction process	biological_process	1.89734	0.000284054	55	Acadsb,Adipoq,Agmo,Akr1c13,Akr1c19,Akr1cl,Akr7a3,Aldh1a1,Aldh3a1,Alkbh6,Ccnb1,Cmahp,Cox6a2,Cyb5r2,Cyp11b2,Cyp1b1,Cyp21a1,Cyp27a1,Cyp2d2,Cyp2d5,Cyp2e1,Cyp2j10,Cyp2j4,Cyp2w1,Cyp51,Cyp8b1,Decr1,Dhcr7,Dio1,Dpyd,Ech1,Eci1,Fabp1,Fmo1,Hsd17b2,LOC100359539,LOC100911440,LOC108348106,LOC108348266,LOC687508,Mpo,Mthfd2,Nr1d1,Pomc,Ppargc1a,Ppp1r1a,Pygm,Retsat,Scd,Scd2,Slc25a23,Sod2,Sqle,Srd5a1,Tet3
GO:0006508	proteolysis	biological_process	1.67513	0.000308121	78	AABR07024139.1,Adamdec1,Adamts15,Adamtsl2,Birc6,C3,Cbl,Ccnf,Cela2a,Cela3b,Cfb,Cfi,Chac1,Cma1,Col4a3,Cpa1,Cpa2,Cpa3,Cpb1,Cryaa,Ctrb1,Ctrc,Ctrl,Dpp10,Fabp1,Fbxl22,Fgg,Hipk2,Hp,Il1r2,Itih3,Itih4,Klk8,Kng1,LOC103694874,LOC108348118,LOC108348172,LOC286960,LOC312273,Lnpep,Mcpt1,Mcpt1l4,Mcpt8,Mcpt8l2,Mmp8,Mmp9,Nr1d1,Pamr1,Pbk,Plg,Prss1,Prss2,Prss3,Prss3b,RGD1305645,Rnf128,S100a8,S100a9,Sdf2l1,Serpina1,S…
GO:0005509	calcium ion binding	molecular_function	2.15648	0.000324717	40	Acan,Actn2,Anxa13,Aspn,Cacna1e,Calb1,Calb2,Cbl,Cdh6,Cracr2a,Creld2,Dlk1,Fat4,Itln1,Kcnip1,Ldlr,Myl1,Npnt,Pamr1,Pla2g1b,Pla2g2a,Pla2g2d,Pnliprp2,Prss2,Ryr2,Ryr3,S100a1,S100a8,S100a9,S100b,S100g,Scgn,Scin,Slc25a23,Slc8a1,Slit3,Spock2,Syt1,Tgm3,Tmprss5
GO:0048518	positive regulation of biological process	biological_process	1.32357	0.000328853	195	AABR07058539.1,AABR07065645.1,AABR07065651.4,AABR07065651.8,AABR07065693.2,AABR07065693.3,AABR07065750.1,AABR07065750.2,AABR07065768.1,AABR07065768.3,AABR07065772.2,AABR07065772.4,AABR07065774.1,AABR07065778.3,AABR07065789.1,AABR07065789.2,AABR07065789.3,AABR07065792.2,AABR07065798.1,AABR07065802.1,AABR07065814.2,AABR07065815.1,AABR07065815.2,AABR07065823.3,AABR07065827.1,AABR07065883.1,Abcb1b,Ac…
GO:0007623	circadian rhythm	biological_process	3.44854	0.000351496	18	Abcb1b,Adcy1,Adipoq,Dbp,Kmt2a,LOC103694380,Ncoa2,Nmu,Nr1d1,Nr1d2,Ntrk2,Per3,Ppargc1a,Prkaa2,Rorc,Srd5a1,Tnf,Top2a
GO:0009719	response to endogenous stimulus	biological_process	1.70253	0.000353681	73	AABR07031756.2,Abcb1b,Actn2,Adamtsl2,Adipoq,Akap6,Aldh3a1,Alpl,Aqp8,Ar,Atp1a2,Atp1a3,Atp2b4,Bmp8a,Bmp8b,Cacna2d1,Cbl,Ccna2,Cfb,Chrdl1,Cpeb1,Cpeb4,Cryaa,Dennd4c,Ephx1,Fat4,Fbxo32,Fgf23,Fgfr2,Foxp2,Gata4,Gdf15,Hcn3,Hhip,Hipk2,Hmgcs1,Htr1b,Kcnd3,Kiaa0408L,LOC103691556,Ldlr,Myocd,Mzb1,Ncoa2,Nefl,Npnt,Nr1d1,Nr1d2,Ntrk2,Pbld1,Phip,Pklr,Pla2g1b,Ppargc1a,Prkaa2,Reg1a,Rgs9,Rorc,Ryr2,S100b,Sfrp1,Sfrp4,Slc3…
GO:0006629	lipid metabolic process	biological_process	1.85322	0.00036046	57	Acsm5,Adipoq,Agmo,Akr1c13,Akr1c19,Akr1cl,Aldh1a1,Apoc3,C3,Calb1,Cel,Ces1d,Clps,Crabp1,Cyb5r2,Cyp1b1,Cyp2d2,Cyp2e1,Cyp2j10,Cyp2j4,Cyp51,Decr1,Dhcr7,Ech1,Eci1,Eef1a2,Ephx2,Fabp1,Fgf23,Gal3st1,Hmgcs1,Hmgcs2,Idi1,Itgb8,Ldlr,Lss,Nr1d1,Nr1d2,Pla2g1b,Pla2g2a,Pla2g2d,Pla2g4c,Plp1,Pnlip,Pnliprp1,Pnliprp2,Ppargc1a,Prkaa2,Retsat,Scd,Scd2,Sqle,Srd5a1,Sult1a1,Thrsp,Timp1,Zbtb20
GO:0140115	export across plasma membrane	biological_process	11.9685	0.000389975	6	Atp1a2,Atp1a3,Fxyd1,Kcnd3,Kcnh2,Slc8a1
GO:0031674	I band	cellular_component	4.32194	0.000607692	13	Actn2,Atp2b4,Dmd,Fbxl22,Fbxo32,Myom1,Myoz1,Ryr2,Ryr3,S100a1,Slc8a1,Synpo2,Trim63
GO:0008152	metabolic process	biological_process	1.16842	0.000708547	355	A1cf,AABR07024139.1,AABR07031756.2,AABR07057190.1,AABR07058539.1,AABR07064000.1,AABR07065645.1,AABR07065651.4,AABR07065651.8,AABR07065693.2,AABR07065693.3,AABR07065750.1,AABR07065750.2,AABR07065768.1,AABR07065768.3,AABR07065772.2,AABR07065772.4,AABR07065774.1,AABR07065778.3,AABR07065789.1,AABR07065789.2,AABR07065789.3,AABR07065792.2,AABR07065798.1,AABR07065802.1,AABR07065814.2,AABR07065815.1,AABR…
GO:0043269	regulation of ion transport	biological_process	2.17997	0.000711531	36	Abcb1b,Actn2,Akap6,Ank2,Atp1a2,Cacna1e,Cacna2d1,Cd19,Clic5,Cracr2a,Dmd,Fgf23,Fxyd1,Hcn3,Htr1b,Kcnd3,Kcne5,Kcnh2,Kcnh6,Kcnip1,LOC103694380,Mmp9,Pla2g1b,Ppargc1a,Rgs9,Ryr2,S100a1,Scn7a,Sfrp4,Slc30a10,Slc8a1,Sncg,Syt1,Tacr2,Tnf,Trh
GO:0044057	regulation of system process	biological_process	2.37137	0.000782493	30	Abcb1b,Adipoq,Ank2,Atp1a2,Atp2b4,Cacna2d1,Chrnb4,Dmd,Fbxo32,Fgg,Gata4,Kcnd3,Kcne5,Kcnh2,Klk8,LOC103694380,Myocd,Nmu,Npnt,Pde5a,Pomc,Ppargc1a,Ryr2,S100a1,S100b,Slc8a1,Tacr2,Tenm4,Tnf,Trim63
GO:0071466	cellular response to xenobiotic stimulus	biological_process	3.92354	0.000832283	14	Abcb1b,Ccna2,Cyp1b1,Cyp2d2,Cyp2e1,Cyp2j10,Cyp2j4,Cyp2w1,Fbxo32,Gsta4,Ppargc1a,Ryr2,Srd5a1,Sult1a1
GO:0031667	response to nutrient levels	biological_process	2.25161	0.000834804	33	Abcb1b,Adipoq,Adrb3,Aldh3a1,Alpl,Bhlha15,Bmp8b,Cbl,Clic5,Cpeb4,Fgf23,Gata4,Gdf15,Hmgcs1,Lcn2,Ldlr,Mpo,Pklr,Pomc,Ppargc1a,Prkaa2,Prl2a1,Prss1,Prss2,Reg1a,Sfrp1,Slc22a3,Slc8a1,Sod2,Srd5a1,Tnks,Upp1,Wnt2b
GO:0006811	ion transport	biological_process	1.67756	0.000844181	70	Abcb1b,Actn2,Akap6,Ank2,Apoc3,Atp1a2,Atp1a3,Atp2b3,Atp2b4,Bhlha15,Cacna1e,Cacna2d1,Calhm5,Cd19,Chrnb4,Clca1,Clic5,Cox6a2,Cracr2a,Dmd,Fabp1,Fgf23,Fxyd1,Gpm6a,Hcn3,Htr1b,Kcnd3,Kcne5,Kcnh2,Kcnh6,Kcnip1,LOC100911440,LOC100911519,LOC103694380,LOC687508,Lcn2,Ldlr,Mfsd2a,Mmp9,Ntrk2,Pla2g1b,Pla2g2a,Pla2g2d,Ppargc1a,Racgap1,Rgs9,Ryr2,Ryr3,S100a1,Scn7a,Sfrp4,Slc13a3,Slc22a1,Slc22a3,Slc25a23,Slc26a2,Slc30a1…
GO:0006941	striated muscle contraction	biological_process	3.68594	0.000861304	15	Ank2,Atp1a2,Atp1a3,Cacna2d1,Dmd,Gata4,Kcnd3,Kcne5,Kcnh2,LOC103694380,Myl1,Pde5a,Ryr2,Slc8a1,Tnf
GO:0009991	response to extracellular stimulus	biological_process	2.20874	0.000899911	34	Abcb1b,Adipoq,Adrb3,Aldh3a1,Alpl,Bhlha15,Bmp8b,Cbl,Clic5,Cpeb4,Fgf23,Gata4,Gdf15,Hmgcs1,Lcn2,Ldlr,Mpo,Myocd,Pklr,Pomc,Ppargc1a,Prkaa2,Prl2a1,Prss1,Prss2,Reg1a,Sfrp1,Slc22a3,Slc8a1,Sod2,Srd5a1,Tnks,Upp1,Wnt2b
GO:0036293	response to decreased oxygen levels	biological_process	2.63383	0.00101076	24	Abcb1b,Adipoq,Aldh3a1,Cbl,Ccna2,Ccnb1,Clca1,Cpeb1,Cpeb4,Cryaa,Fabp1,LOC103694380,Myocd,Nppc,Pklr,Ppargc1a,Reg1a,Ryr2,S100b,Sfrp1,Slc8a1,Sod2,Tnf,Trh
GO:0034762	regulation of transmembrane transport	biological_process	2.28528	0.00109064	31	Actn2,Adipoq,Akap6,Ank2,Atp1a2,C3,Cacna1e,Cacna2d1,Cd19,Clic5,Cracr2a,Dmd,Fxyd1,Hcn3,Itln1,Kcnd3,Kcne5,Kcnh2,Kcnh6,Kcnip1,LOC103694380,Mmp9,Mzb1,Pla2g1b,Ppargc1a,Rgs9,Ryr2,S100a1,Scn7a,Slc8a1,Tnf
GO:0060048	cardiac muscle contraction	biological_process	4.04439	0.0011394	13	Ank2,Atp1a2,Atp1a3,Cacna2d1,Dmd,Gata4,Kcnd3,Kcne5,Kcnh2,Myl1,Pde5a,Ryr2,Slc8a1
GO:0070887	cellular response to chemical stimulus	biological_process	1.47378	0.00123927	107	AABR07031756.2,Abcb1b,Actn2,Adamtsl2,Adipoq,Akap6,Alpl,Aqp8,Ar,Atp1a2,Atp1a3,Atp2b4,Bhlha15,Birc5,Bmp8a,Bmp8b,Cacna2d1,Calb1,Cbl,Ccna2,Ccnb1,Chga,Chrdl1,Clca1,Cma1,Cpeb1,Cpeb4,Crlf1,Cxcl14,Cxcl17,Cyp1b1,Cyp2d2,Cyp2e1,Cyp2j10,Cyp2j4,Cyp2w1,Dennd4c,Dmd,Ephx1,Erp27,Fabp1,Fat4,Fbxo32,Fgf23,Fgfr2,Fgg,Gata4,Gdf15,Gpr75,Gsta4,Hcn3,Hhip,Hipk2,Hmgcs1,Htr1b,Il1r2,Ina,Itga1,Kcnd3,Kcnh2,Kiaa0408L,LOC10369155…
GO:0006950	response to stress	biological_process	1.41672	0.00138769	125	AABR07065645.1,AABR07065651.4,AABR07065651.8,AABR07065693.2,AABR07065693.3,AABR07065750.1,AABR07065750.2,AABR07065768.1,AABR07065768.3,AABR07065772.2,AABR07065772.4,AABR07065774.1,AABR07065778.3,AABR07065789.1,AABR07065789.2,AABR07065789.3,AABR07065792.2,AABR07065798.1,AABR07065802.1,AABR07065814.2,AABR07065815.1,AABR07065815.2,AABR07065823.3,AABR07065827.1,AABR07065883.1,Abcb1b,Adipoq,Adrb3,Aldh…
GO:1990268	response to gold nanoparticle	biological_process	33.9106	0.00144641	3	LOC103694380,Mpo,Tnf
GO:0005506	iron ion binding	molecular_function	3.05196	0.00158505	18	Agmo,Cyp11b2,Cyp1b1,Cyp21a1,Cyp27a1,Cyp2d2,Cyp2d5,Cyp2e1,Cyp2j10,Cyp2j4,Cyp2w1,Cyp51,Cyp8b1,LOC108348266,Lcn2,Scd,Scd2,Tet3
GO:0016042	lipid catabolic process	biological_process	2.74951	0.00168684	21	Adipoq,Apoc3,Cel,Ces1d,Clps,Crabp1,Cyp1b1,Decr1,Ech1,Eci1,Fabp1,Fgf23,Ldlr,Pla2g1b,Pla2g2a,Pla2g2d,Pla2g4c,Pnlip,Pnliprp1,Pnliprp2,Srd5a1
GO:0020037	heme binding	molecular_function	3.2883	0.00173707	16	Cyp11b2,Cyp1b1,Cyp21a1,Cyp27a1,Cyp2d2,Cyp2d5,Cyp2e1,Cyp2j10,Cyp2j4,Cyp2w1,Cyp51,Cyp8b1,LOC108348266,Mpo,Ngb,Nr1d1
GO:0010882	regulation of cardiac muscle contraction by calcium ion signaling	biological_process	12.1109	0.00192999	5	Ank2,Atp1a2,Dmd,Ryr2,Slc8a1
GO:0016712	oxidoreductase activity, acting on paired donors, with incorporation or reduction of molecular oxygen, reduced flavin or flavoprotein as one donor, and incorporation of one atom of oxygen	molecular_function	6.16557	0.00205998	8	Cyp1b1,Cyp2d2,Cyp2d5,Cyp2e1,Cyp2j10,Cyp2j4,Cyp2w1,LOC108348266
GO:0009636	response to toxic substance	biological_process	2.14879	0.00244699	32	Abcb1b,Adipoq,Akr7a3,Atp1a2,Car3,Cbl,Ccnb1,Chrnb4,Cryaa,Cyp1b1,Cyp2e1,Ephx1,Fabp1,Fgfr2,Gsta3,Gsta4,Hcn3,Htr1b,Lcn2,Mpo,Nefl,Nppc,Ppargc1a,Prss1,Rgs9,S100a8,Slc7a11,Slc8a1,Sod2,Srd5a1,Sult1a1,Trh
GO:0016491	oxidoreductase activity	molecular_function	1.88392	0.00244699	44	Acadsb,Agmo,Akr1c13,Akr1c19,Akr1cl,Akr7a3,Aldh1a1,Aldh3a1,Alkbh6,Cmahp,Cox6a2,Cyb5r2,Cyp11b2,Cyp1b1,Cyp21a1,Cyp27a1,Cyp2d2,Cyp2d5,Cyp2e1,Cyp2j10,Cyp2j4,Cyp2w1,Cyp51,Cyp8b1,Decr1,Dhcr7,Dio1,Dpyd,Erp27,Fmo1,Hsd17b2,LOC100359539,LOC108348106,LOC108348266,LOC687508,Mpo,Mthfd2,Retsat,Scd,Scd2,Sod2,Sqle,Srd5a1,Tet3
GO:0010881	regulation of cardiac muscle contraction by regulation of the release of sequestered calcium ion	biological_process	16.9553	0.00253234	4	Ank2,Dmd,Ryr2,Slc8a1
GO:0071495	cellular response to endogenous stimulus	biological_process	1.70582	0.00261232	58	AABR07031756.2,Abcb1b,Actn2,Adamtsl2,Adipoq,Akap6,Aqp8,Ar,Atp1a2,Atp1a3,Atp2b4,Bmp8a,Bmp8b,Cacna2d1,Cbl,Ccna2,Chrdl1,Cpeb1,Cpeb4,Dennd4c,Ephx1,Fat4,Fbxo32,Fgf23,Fgfr2,Gata4,Gdf15,Hcn3,Hhip,Hipk2,Hmgcs1,Htr1b,Kcnd3,Kiaa0408L,LOC103691556,Myocd,Mzb1,Npnt,Nr1d1,Nr1d2,Ntrk2,Pbld1,Phip,Pklr,Pla2g1b,Ppargc1a,Prkaa2,Reg1a,Rorc,Ryr2,Sfrp1,Sfrp4,Slc30a10,Slc8a1,Slit3,Sox9,Srd5a1,Trh
GO:0071867	response to monoamine	biological_process	6.9816	0.00261232	7	Adipoq,Atp2b4,Hcn3,Pklr,Ppargc1a,Ryr2,Srd5a1
GO:0071869	response to catecholamine	biological_process	6.9816	0.00261232	7	Adipoq,Atp2b4,Hcn3,Pklr,Ppargc1a,Ryr2,Srd5a1
GO:0046906	tetrapyrrole binding	molecular_function	3.15448	0.00268534	16	Cyp11b2,Cyp1b1,Cyp21a1,Cyp27a1,Cyp2d2,Cyp2d5,Cyp2e1,Cyp2j10,Cyp2j4,Cyp2w1,Cyp51,Cyp8b1,LOC108348266,Mpo,Ngb,Nr1d1
GO:0070482	response to oxygen levels	biological_process	2.43669	0.00305204	24	Abcb1b,Adipoq,Aldh3a1,Cbl,Ccna2,Ccnb1,Clca1,Cpeb1,Cpeb4,Cryaa,Fabp1,LOC103694380,Myocd,Nppc,Pklr,Ppargc1a,Reg1a,Ryr2,S100b,Sfrp1,Slc8a1,Sod2,Tnf,Trh
GO:0051234	establishment of localization	biological_process	1.32569	0.00306598	157	AABR07008439.1,AABR07011057.2,AABR07065645.1,AABR07065651.4,AABR07065651.8,AABR07065693.2,AABR07065693.3,AABR07065750.1,AABR07065750.2,AABR07065768.1,AABR07065768.3,AABR07065772.2,AABR07065772.4,AABR07065774.1,AABR07065778.3,AABR07065789.1,AABR07065789.2,AABR07065789.3,AABR07065792.2,AABR07065798.1,AABR07065802.1,AABR07065814.2,AABR07065815.1,AABR07065815.2,AABR07065823.3,AABR07065827.1,AABR07065…
GO:1901701	cellular response to oxygen-containing compound	biological_process	1.77171	0.00337023	50	Abcb1b,Actn2,Adipoq,Akap6,Aqp8,Ar,Atp1a3,Atp2b4,Birc5,Cacna2d1,Ccna2,Ccnb1,Cma1,Cpeb1,Cpeb4,Cyp1b1,Dennd4c,Fabp1,Fbxo32,Fgf23,Fgfr2,Gata4,Gdf15,Hcn3,Hmgcs1,Kiaa0408L,Lbp,Lcn2,Ldlr,Ltk,Mmp9,Mpo,Mzb1,Nr1d1,Ntrk2,Phip,Pklr,Pla2g1b,Ppargc1a,Prkaa2,Reg1a,Rorc,Ryr2,Sfrp1,Slc30a10,Slc8a1,Sod2,Sox9,Srd5a1,Zbtb20
GO:0001508	action potential	biological_process	3.83894	0.00341098	12	Ank2,Cacna2d1,Chrnb4,Dmd,Kcnd3,Kcne5,Kcnh2,LOC103694380,Ntrk2,Ryr2,Scn7a,Tnf
GO:0048522	positive regulation of cellular process	biological_process	1.30016	0.00355789	171	AABR07058539.1,AABR07065645.1,AABR07065651.4,AABR07065651.8,AABR07065693.2,AABR07065693.3,AABR07065750.1,AABR07065750.2,AABR07065768.1,AABR07065768.3,AABR07065772.2,AABR07065772.4,AABR07065774.1,AABR07065778.3,AABR07065789.1,AABR07065789.2,AABR07065789.3,AABR07065792.2,AABR07065798.1,AABR07065802.1,AABR07065814.2,AABR07065815.1,AABR07065815.2,AABR07065823.3,AABR07065827.1,AABR07065883.1,Abcb1b,Ac…
GO:0034765	regulation of ion transmembrane transport	biological_process	2.30805	0.00362642	26	Actn2,Akap6,Ank2,Atp1a2,Cacna1e,Cacna2d1,Cd19,Clic5,Cracr2a,Dmd,Fxyd1,Hcn3,Kcnd3,Kcne5,Kcnh2,Kcnh6,Kcnip1,LOC103694380,Mmp9,Ppargc1a,Rgs9,Ryr2,S100a1,Scn7a,Slc8a1,Tnf
GO:0044449	contractile fiber part	cellular_component	3.19912	0.00369532	15	Actn2,Atp2b4,Dmd,Fbxl22,Fbxo32,Myom1,Myoz1,Npnt,Ryr2,Ryr3,S100a1,Slc8a1,Synpo2,Tmod2,Trim63
GO:0010033	response to organic substance	biological_process	1.40626	0.00403141	114	AABR07031756.2,Abcb1b,Actn2,Adamtsl2,Adipoq,Akap6,Aldh3a1,Alpl,Ank2,Aqp8,Ar,Atp1a2,Atp1a3,Atp2b4,Bhlha15,Birc5,Bmp8a,Bmp8b,Cacna2d1,Calb1,Car3,Cbl,Ccna2,Ccnb1,Cfb,Chac1,Chrdl1,Cma1,Col4a3,Cpeb1,Cpeb4,Crlf1,Cryaa,Cyp1b1,Cyp2e1,Cyp2j4,Dennd4c,Dmd,Ephx1,Fat4,Fbxo32,Fgf23,Fgfr2,Fgg,Fmo1,Foxp2,Gata4,Gdf15,Gpr75,Hcn3,Hhip,Hipk2,Hmgcs1,Hsd17b2,Htr1b,Il1r2,Ina,Isg15,Itih4,Kcnd3,Kiaa0408L,LOC103691556,LOC…
GO:0043292	contractile fiber	cellular_component	3.03112	0.00405207	16	Actn2,Atp2b4,Dmd,Fbxl22,Fbxo32,Myl1,Myom1,Myoz1,Npnt,Ryr2,Ryr3,S100a1,Slc8a1,Synpo2,Tmod2,Trim63
GO:0006720	isoprenoid metabolic process	biological_process	4.40398	0.00409345	10	Aldh1a1,Crabp1,Cyp1b1,Cyp2e1,Cyp2j4,Hmgcs1,Hmgcs2,Idi1,Retsat,Srd5a1
GO:0001666	response to hypoxia	biological_process	2.48678	0.00423831	22	Abcb1b,Adipoq,Aldh3a1,Ccna2,Ccnb1,Clca1,Cpeb1,Cryaa,Fabp1,LOC103694380,Myocd,Nppc,Pklr,Ppargc1a,Reg1a,Ryr2,S100b,Sfrp1,Slc8a1,Sod2,Tnf,Trh
GO:0071704	organic substance metabolic process	biological_process	1.1577	0.00428702	333	A1cf,AABR07024139.1,AABR07031756.2,AABR07057190.1,AABR07058539.1,AABR07064000.1,AABR07065645.1,AABR07065651.4,AABR07065651.8,AABR07065693.2,AABR07065693.3,AABR07065750.1,AABR07065750.2,AABR07065768.1,AABR07065768.3,AABR07065772.2,AABR07065772.4,AABR07065774.1,AABR07065778.3,AABR07065789.1,AABR07065789.2,AABR07065789.3,AABR07065792.2,AABR07065798.1,AABR07065802.1,AABR07065814.2,AABR07065815.1,AABR…
GO:0060047	heart contraction	biological_process	2.99762	0.00449342	16	Ank2,Atp1a2,Atp1a3,Atp2b4,Cacna2d1,Dmd,Gata4,Kcnd3,Kcne5,Kcnh2,Myl1,Nmu,Pde5a,Ryr2,S100a1,Slc8a1
GO:0043385	mycotoxin metabolic process	biological_process	25.433	0.00454959	3	Akr7a3,Cyp2w1,Gsta3
GO:0046222	aflatoxin metabolic process	biological_process	25.433	0.00454959	3	Akr7a3,Cyp2w1,Gsta3
GO:1901376	organic heteropentacyclic compound metabolic process	biological_process	25.433	0.00454959	3	Akr7a3,Cyp2w1,Gsta3
GO:1990267	response to transition metal nanoparticle	biological_process	25.433	0.00454959	3	LOC103694380,Mpo,Tnf
GO:0071868	cellular response to monoamine stimulus	biological_process	7.53569	0.00502933	6	Adipoq,Atp2b4,Hcn3,Pklr,Ryr2,Srd5a1
GO:0071870	cellular response to catecholamine stimulus	biological_process	7.53569	0.00502933	6	Adipoq,Atp2b4,Hcn3,Pklr,Ryr2,Srd5a1
GO:0009725	response to hormone	biological_process	1.75779	0.00505537	48	AABR07031756.2,Abcb1b,Actn2,Adipoq,Aldh3a1,Alpl,Ar,Atp1a2,Atp1a3,Cbl,Ccna2,Cfb,Cpeb1,Cryaa,Dennd4c,Ephx1,Fbxo32,Fgf23,Foxp2,Gdf15,Hmgcs1,Htr1b,Kiaa0408L,Mzb1,Ncoa2,Nefl,Nr1d1,Nr1d2,Ntrk2,Phip,Pklr,Pla2g1b,Ppargc1a,Prkaa2,Reg1a,Rgs9,Rorc,S100b,Sfrp1,Slc30a10,Slit3,Srd5a1,Sst,Sult1a1,Timp1,Trh,Trim63
GO:0030017	sarcomere	cellular_component	3.20776	0.00560925	14	Actn2,Atp2b4,Dmd,Fbxl22,Fbxo32,Myom1,Myoz1,Ryr2,Ryr3,S100a1,Slc8a1,Synpo2,Tmod2,Trim63
GO:0030016	myofibril	cellular_component	3.04586	0.00577611	15	Actn2,Atp2b4,Dmd,Fbxl22,Fbxo32,Myl1,Myom1,Myoz1,Ryr2,Ryr3,S100a1,Slc8a1,Synpo2,Tmod2,Trim63
GO:0014823	response to activity	biological_process	4.1865	0.00577611	10	Adipoq,Cbl,LOC103694380,Ppargc1a,Prkaa2,Ryr2,Sod2,Srd5a1,Sult1a1,Tnf
GO:0006721	terpenoid metabolic process	biological_process	5.11858	0.00652944	8	Aldh1a1,Crabp1,Cyp1b1,Cyp2e1,Cyp2j4,Hmgcs1,Retsat,Srd5a1
GO:0006810	transport	biological_process	1.31127	0.00658881	151	AABR07008439.1,AABR07011057.2,AABR07065645.1,AABR07065651.4,AABR07065651.8,AABR07065693.2,AABR07065693.3,AABR07065750.1,AABR07065750.2,AABR07065768.1,AABR07065768.3,AABR07065772.2,AABR07065772.4,AABR07065774.1,AABR07065778.3,AABR07065789.1,AABR07065789.2,AABR07065789.3,AABR07065792.2,AABR07065798.1,AABR07065802.1,AABR07065814.2,AABR07065815.1,AABR07065815.2,AABR07065823.3,AABR07065827.1,AABR07065…
GO:0065008	regulation of biological quality	biological_process	1.36081	0.00671452	124	Abcb1b,Actn2,Adipoq,Adm2,Adora3,Adrb3,Akap6,Aldh1a1,Ank2,Apba2,Apoc3,Aqp5,Ar,Atp1a2,Atp1a3,Atp2b3,Atp2b4,Bhlha15,Birc5,Bmp8b,C3,Cacna2d1,Calb1,Calb2,Ccne1,Cd19,Cd7,Chrnb4,Clmn,Cma1,Cpa3,Crabp1,Cttnbp2,Cyp1b1,Cytl1,Dhcr7,Dio1,Dmd,Dpyd,Duoxa2,Ephx2,Fgf23,Fgg,Fmn1,Fxyd1,Gata4,Gfap,Gpm6a,Grid2ip,Hcn3,Htr1b,Itga1,Itga7,Kcnd3,Kcne5,Kcnh2,Klk8,Kmt2a,Kng1,LOC100910717,LOC103694380,Lcn2,Ldlr,Lss,Mmp8,Nefl…
GO:0016192	vesicle-mediated transport	biological_process	1.63493	0.00671452	58	AABR07011057.2,AABR07065645.1,AABR07065651.4,AABR07065651.8,AABR07065693.2,AABR07065693.3,AABR07065750.1,AABR07065750.2,AABR07065768.1,AABR07065768.3,AABR07065772.2,AABR07065772.4,AABR07065774.1,AABR07065778.3,AABR07065789.1,AABR07065789.2,AABR07065789.3,AABR07065792.2,AABR07065798.1,AABR07065802.1,AABR07065814.2,AABR07065815.1,AABR07065815.2,AABR07065823.3,AABR07065827.1,AABR07065883.1,Actn2,Adi…
GO:0003015	heart process	biological_process	2.87074	0.00671452	16	Ank2,Atp1a2,Atp1a3,Atp2b4,Cacna2d1,Dmd,Gata4,Kcnd3,Kcne5,Kcnh2,Myl1,Nmu,Pde5a,Ryr2,S100a1,Slc8a1
GO:0001101	response to acid chemical	biological_process	2.33516	0.00671452	23	Abcb1b,Adipoq,Aspn,Atp1a3,Atp2b4,Ccnb1,Cpeb1,Cpeb4,Cyp2e1,Dmd,Fgfr2,Hsd17b2,Ldlr,Ltk,Ntrk2,Ppargc1a,Prkaa2,Reg1a,Scd,Sfrp1,Sod2,Sox9,Sst
GO:0019538	protein metabolic process	biological_process	1.24848	0.00694692	198	AABR07024139.1,AABR07057190.1,AABR07058539.1,AABR07064000.1,AABR07065645.1,AABR07065651.4,AABR07065651.8,AABR07065693.2,AABR07065693.3,AABR07065750.1,AABR07065750.2,AABR07065768.1,AABR07065768.3,AABR07065772.2,AABR07065772.4,AABR07065774.1,AABR07065778.3,AABR07065789.1,AABR07065789.2,AABR07065789.3,AABR07065792.2,AABR07065798.1,AABR07065802.1,AABR07065814.2,AABR07065815.1,AABR07065815.2,AABR07065…
GO:0008016	regulation of heart contraction	biological_process	3.10293	0.00743853	14	Ank2,Atp1a2,Atp2b4,Cacna2d1,Dmd,Gata4,Kcnd3,Kcne5,Kcnh2,Nmu,Pde5a,Ryr2,S100a1,Slc8a1
GO:0061024	membrane organization	biological_process	1.94757	0.00743853	34	AABR07065645.1,AABR07065651.4,AABR07065651.8,AABR07065693.2,AABR07065693.3,AABR07065750.1,AABR07065750.2,AABR07065768.1,AABR07065768.3,AABR07065772.2,AABR07065772.4,AABR07065774.1,AABR07065778.3,AABR07065789.1,AABR07065789.2,AABR07065789.3,AABR07065792.2,AABR07065798.1,AABR07065802.1,AABR07065814.2,AABR07065815.1,AABR07065815.2,AABR07065823.3,AABR07065827.1,AABR07065883.1,Abcb1b,Ar,C3,Fat4,Igh-6,…
GO:0009404	toxin metabolic process	biological_process	8.92385	0.00743853	5	Akr7a3,Cyp1b1,Cyp2w1,Fmo1,Gsta3
GO:0031960	response to corticosteroid	biological_process	2.82589	0.00779471	16	AABR07031756.2,Abcb1b,Adipoq,Aldh3a1,Alpl,Cryaa,Ephx1,Fbxo32,Htr1b,Nefl,S100b,Slit3,Srd5a1,Sult1a1,Trh,Trim63
GO:0048545	response to steroid hormone	biological_process	2.21349	0.00785145	25	AABR07031756.2,Abcb1b,Adipoq,Aldh3a1,Alpl,Ar,Atp1a2,Cryaa,Ephx1,Fbxo32,Htr1b,Ncoa2,Nefl,Nr1d1,Nr1d2,Ntrk2,Rorc,S100b,Sfrp1,Slit3,Srd5a1,Sst,Sult1a1,Trh,Trim63
GO:0048513	animal organ development	biological_process	1.37459	0.00787382	115	Abcb1b,Acan,Actn2,Adamtsl2,Adcy1,Adipoq,Aldh1a1,Alpl,Ank2,Aqp5,Ar,Ash1l,Atp1a3,Atp2b3,Atp2b4,Atxn1,Basp1,Birc6,Calb1,Cbl,Cckar,Ccna2,Ccnb1,Ccnf,Cd79b,Cd8a,Chad,Chrdl1,Clic5,Cma1,Col11a1,Col4a3,Crlf1,Cryaa,Cttnbp2,Cxcl14,Cyp1b1,Cytl1,Dbp,Dhcr7,Dmd,Ephx1,Fat4,Fgf23,Fgfr2,Fmn1,Foxn3,Foxp2,Frem2,Gata4,Gbx2,Gpm6a,Gsc,Gsta3,Hhip,Hipk2,Hmgcs1,Hoxd4,Hsd17b2,Il17d,Itga7,Itgb8,Itm2a,Kmt2a,Lims2,Mfsd2a,Mib1…
GO:0090257	regulation of muscle system process	biological_process	2.81124	0.00812516	16	Ank2,Atp1a2,Atp2b4,Chrnb4,Dmd,Fbxo32,Gata4,Myocd,Nmu,Npnt,Pde5a,Ppargc1a,Ryr2,Slc8a1,Tacr2,Trim63
GO:0016126	sterol biosynthetic process	biological_process	5.65177	0.00821654	7	Cyb5r2,Cyp51,Dhcr7,Hmgcs1,Hmgcs2,Lss,Sqle
GO:0008395	steroid hydroxylase activity	molecular_function	6.78212	0.00825709	6	Cyp2d2,Cyp2e1,Cyp2j10,Cyp2j4,Cyp2w1,Cyp8b1
GO:0036376	sodium ion export across plasma membrane	biological_process	12.3311	0.00826033	4	Atp1a2,Atp1a3,Fxyd1,Slc8a1
GO:0050727	regulation of inflammatory response	biological_process	2.59741	0.00878427	18	Adipoq,Ash1l,C3,Cxcl17,Duoxa2,Il17d,Il1r2,LOC103694380,Lbp,Ldlr,Nr1d2,Pbk,Pglyrp1,Rictor,S100a8,S100a9,Tnf,Tnfsf18
GO:0051384	response to glucocorticoid	biological_process	2.89011	0.00901875	15	AABR07031756.2,Abcb1b,Adipoq,Aldh3a1,Alpl,Cryaa,Ephx1,Fbxo32,Nefl,S100b,Slit3,Srd5a1,Sult1a1,Trh,Trim63
GO:0002021	response to dietary excess	biological_process	8.47766	0.00901875	5	Adrb3,Bmp8b,Clic5,Gdf15,Ppargc1a
GO:0008106	alcohol dehydrogenase (NADP+) activity	molecular_function	8.47766	0.00901875	5	Akr1c13,Akr1c19,Akr1cl,Akr7a3,Aldh3a1
GO:0044342	type B pancreatic cell proliferation	biological_process	8.47766	0.00901875	5	Birc5,Igfbp3,Nr1d1,Reg1a,Sfrp1
GO:0046873	metal ion transmembrane transporter activity	molecular_function	2.17935	0.00933117	25	Atp1a2,Atp1a3,Atp2b3,Atp2b4,Cacna1e,Cacna2d1,Gpm6a,Hcn3,Htr1b,Kcnd3,Kcne5,Kcnh2,Kcnh6,Ryr2,Ryr3,Scn7a,Slc13a3,Slc22a1,Slc22a3,Slc4a4,Slc4a7,Slc8a1,Tfrc,Trpm5,Trpv6
GO:0010035	response to inorganic substance	biological_process	1.98345	0.00947162	31	Abcb1b,Adcy1,Aspn,Atp2b4,Ccna2,Ccnb1,Cryaa,Cyp1b1,Cyp2e1,Dmd,Eef1a2,Fabp1,Fgf23,Fgg,Gsta4,Hmgcs1,Kmt2a,Lcn2,Mmp9,Mpo,Nefl,Pklr,Ppargc1a,Prkaa2,Ryr2,S100a8,Slc25a23,Slc30a10,Slc8a1,Sod2,Syt1
GO:0086003	cardiac muscle cell contraction	biological_process	4.75939	0.00947162	8	Ank2,Atp1a2,Cacna2d1,Gata4,Kcnd3,Kcne5,Kcnh2,Ryr2
GO:1901564	organonitrogen compound metabolic process	biological_process	1.21716	0.00947162	222	AABR07024139.1,AABR07057190.1,AABR07058539.1,AABR07064000.1,AABR07065645.1,AABR07065651.4,AABR07065651.8,AABR07065693.2,AABR07065693.3,AABR07065750.1,AABR07065750.2,AABR07065768.1,AABR07065768.3,AABR07065772.2,AABR07065772.4,AABR07065774.1,AABR07065778.3,AABR07065789.1,AABR07065789.2,AABR07065789.3,AABR07065792.2,AABR07065798.1,AABR07065802.1,AABR07065814.2,AABR07065815.1,AABR07065815.2,AABR07065…
GO:0048511	rhythmic process	biological_process	2.48765	0.0098123	19	Abcb1b,Adcy1,Adipoq,Dbp,Kmt2a,LOC103694380,Ncoa2,Nmu,Nr1d1,Nr1d2,Ntrk2,Per3,Ppargc1a,Prkaa2,Rorc,Slit3,Srd5a1,Tnf,Top2a
GO:0071417	cellular response to organonitrogen compound	biological_process	2.02765	0.0101682	29	Abcb1b,Actn2,Adipoq,Akap6,Aqp8,Atp1a3,Atp2b4,Cacna2d1,Ccna2,Cpeb1,Cpeb4,Dennd4c,Gdf15,Hcn3,Htr1b,Kiaa0408L,Mzb1,Ntrk2,Phip,Pklr,Pla2g1b,Ppargc1a,Reg1a,Ryr2,Sfrp1,Slc30a10,Slc8a1,Sox9,Srd5a1
GO:0051179	localization	biological_process	1.24389	0.0105624	191	A1cf,AABR07008439.1,AABR07011057.2,AABR07065645.1,AABR07065651.4,AABR07065651.8,AABR07065693.2,AABR07065693.3,AABR07065750.1,AABR07065750.2,AABR07065768.1,AABR07065768.3,AABR07065772.2,AABR07065772.4,AABR07065774.1,AABR07065778.3,AABR07065789.1,AABR07065789.2,AABR07065789.3,AABR07065792.2,AABR07065798.1,AABR07065802.1,AABR07065814.2,AABR07065815.1,AABR07065815.2,AABR07065823.3,AABR07065827.1,AABR…
GO:0061469	regulation of type B pancreatic cell proliferation	biological_process	11.3035	0.011247	4	Birc5,Nr1d1,Reg1a,Sfrp1
GO:0062012	regulation of small molecule metabolic process	biological_process	2.44982	0.0116447	19	Adipoq,Apoc3,Atp2b4,Ccnb1,Cyp51,Dhcr7,Ephx2,Fabp1,Guca2a,Igfbp3,LOC687508,Ldlr,Ncoa2,Nr1d1,Pomc,Ppargc1a,Slc25a23,Tff3,Zbtb20
GO:0042127	regulation of cell proliferation	biological_process	1.5659	0.0122315	61	Adipoq,Aldh3a1,Ar,Bex4,Birc5,Birc6,Ccna2,Ccnb1,Ccnf,Clmn,Cpeb1,Crlf1,Cyp1b1,Dhcr7,Dmd,Fgfr2,Foxp2,Gfap,Gkn3,Hipk2,Htr1b,Igfbp3,Itga1,Kmt2a,LOC103694380,Lifr,Lims2,Mitf,Mmp9,Myocd,Mzb1,Nppc,Nr1d1,Ntrk2,Pbld1,Pde5a,Pla2g1b,Pla2g2d,Ppargc1a,Prc1,Prl2a1,Rarres1,Reg1a,Reg3a,Rictor,Ripk3,S100b,Sapcd2,Scin,Sfrp1,Sfrp4,Slit3,Sod2,Sox9,Tfrc,Tgm1,Timp1,Tnf,Tnfsf18,Wnt3,Zbtb16
GO:0048731	system development	biological_process	1.29477	0.0125123	147	Abcb1b,Acan,Actn2,Adamtsl2,Adcy1,Adipoq,Adm2,Aldh1a1,Alpl,Ank2,Aqp5,Ar,Ash1l,Atp1a3,Atp2b3,Atp2b4,Atxn1,Basp1,Birc6,C3,Calb1,Cbl,Cckar,Ccna2,Ccnb1,Ccnf,Cd79b,Cd8a,Chac1,Chad,Chrdl1,Clic5,Clmn,Cma1,Col11a1,Col4a3,Cpeb1,Crlf1,Cryaa,Ctf1,Cttnbp2,Cxcl14,Cyp1b1,Cytl1,Dbp,Dhcr7,Dmd,Ephx1,Epop,Faim,Fat4,Fgf23,Fgfr2,Fmn1,Foxn3,Foxp2,Frem2,Gal3st1,Gata4,Gbx2,Gfap,Gpm6a,Gsc,Gsta3,Hdac11,Hhip,Hipk2,Hmgcs1,H…
GO:0006937	regulation of muscle contraction	biological_process	3.22958	0.0127249	12	Ank2,Atp1a2,Chrnb4,Dmd,Gata4,Myocd,Nmu,Npnt,Pde5a,Ryr2,Slc8a1,Tacr2
GO:0099625	ventricular cardiac muscle cell membrane repolarization	biological_process	7.70696	0.0135854	5	Ank2,Cacna2d1,Kcnd3,Kcne5,Kcnh2
GO:0006805	xenobiotic metabolic process	biological_process	4.44729	0.0143984	8	Cyp1b1,Cyp2d2,Cyp2e1,Cyp2j10,Cyp2j4,Cyp2w1,Gsta4,Sult1a1
GO:0001505	regulation of neurotransmitter levels	biological_process	2.39517	0.0149368	19	Adora3,Apba2,Atp1a2,Atp2b4,Cyp1b1,Dpyd,Gfap,Htr1b,LOC103694380,Mmp8,Ntrk2,Slc22a3,Sncg,Sod2,Srd5a1,Syt1,Tacr2,Tnf,Trh
GO:0099509	regulation of presynaptic cytosolic calcium ion concentration	biological_process	10.434	0.0152068	4	Atp2b3,Calb1,Calb2,Htr1b
GO:0008283	cell proliferation	biological_process	1.49386	0.0163745	70	Adipoq,Aldh3a1,Ar,Bex4,Birc5,Birc6,Ccna2,Ccnb1,Ccnf,Clmn,Col4a3,Cpeb1,Crlf1,Cyp1b1,Dhcr7,Dmd,Fat4,Fgfr2,Foxp2,Gbx2,Gfap,Gkn3,Hhip,Hipk2,Htr1b,Igfbp3,Itga1,Klk8,Kmt2a,LOC103694380,Lifr,Lims2,Ltk,Mitf,Mmp9,Myocd,Mzb1,Nppc,Nr1d1,Ntrk2,Pbld1,Pde5a,Pla2g1b,Pla2g2d,Ppargc1a,Prc1,Prl2a1,Racgap1,Rarres1,Reg1a,Reg3a,Rictor,Ripk3,S100b,Sapcd2,Scin,Sfrp1,Sfrp4,Slit3,Sod2,Sox9,Tenm4,Tfrc,Tgm1,Timp1,Tnf,Tnfsf…
GO:0004033	aldo-keto reductase (NADP) activity	molecular_function	7.37187	0.016446	5	Akr1c13,Akr1c19,Akr1cl,Akr7a3,Aldh3a1
GO:0006694	steroid biosynthetic process	biological_process	3.33051	0.016446	11	Cyb5r2,Cyp51,Dhcr7,Hmgcs1,Hmgcs2,Lss,Nr1d1,Ppargc1a,Sqle,Srd5a1,Timp1
GO:0008270	zinc ion binding	molecular_function	1.80589	0.0169947	36	AABR07058539.1,Adamts15,Ar,Calb1,Car11,Car3,Cpa1,Cpa2,Cpa3,Cpb1,Dmd,Gata4,Hhip,Kmt2a,LOC103694874,LOC108348118,Lnpep,Mib1,Mmp8,Mmp9,Nr1d1,Nr1d2,Nr3c2,Pglyrp1,Rorc,S100a8,S100a9,S100b,Tet3,Timp1,Tk1,Tnks,Trhde,Trim15,Trim63,Zfhx3
GO:0015318	inorganic molecular entity transmembrane transporter activity	molecular_function	1.75167	0.0180685	39	Aqp5,Atp1a2,Atp1a3,Atp2b3,Atp2b4,Cacna1e,Cacna2d1,Chrnb4,Clca1,Clic5,Cox6a2,Fxyd1,Gpm6a,Hcn3,Htr1b,Kcnd3,Kcne5,Kcnh2,Kcnh6,LOC100911440,LOC100911519,LOC687508,Mfsd2a,Ryr2,Ryr3,Scn7a,Slc13a3,Slc22a1,Slc22a3,Slc26a2,Slc2a12,Slc4a4,Slc4a7,Slc7a10,Slc7a11,Slc8a1,Tfrc,Trpm5,Trpv6
GO:0001823	mesonephros development	biological_process	3.53236	0.0181946	10	Calb1,Crlf1,Fat4,Fmn1,Gsta3,Npnt,Sfrp1,Sox9,Wnt2b,Zbtb16
GO:0016709	oxidoreductase activity, acting on paired donors, with incorporation or reduction of molecular oxygen, NAD(P)H as one donor, and incorporation of one atom of oxygen	molecular_function	5.65177	0.0199172	6	Akr1c13,Akr1c19,Akr1cl,Cyp51,Fmo1,Sqle
GO:0006812	cation transport	biological_process	1.63425	0.0199314	48	Abcb1b,Actn2,Akap6,Ank2,Atp1a2,Atp1a3,Atp2b3,Atp2b4,Bhlha15,Cacna1e,Cacna2d1,Cd19,Cox6a2,Cracr2a,Dmd,Fxyd1,Gpm6a,Hcn3,Htr1b,Kcnd3,Kcne5,Kcnh2,Kcnh6,Kcnip1,LOC687508,Mmp9,Pla2g1b,Ppargc1a,Rgs9,Ryr2,Ryr3,S100a1,Scn7a,Slc13a3,Slc22a1,Slc22a3,Slc25a23,Slc30a10,Slc4a4,Slc4a7,Slc7a10,Slc8a1,Sncg,Syt1,Tacr2,Tfrc,Trpm5,Trpv6
GO:0034220	ion transmembrane transport	biological_process	1.6414	0.0205805	47	Actn2,Akap6,Ank2,Atp1a2,Atp1a3,Atp2b3,Atp2b4,Bhlha15,Cacna1e,Cacna2d1,Cd19,Chrnb4,Clca1,Clic5,Cox6a2,Cracr2a,Dmd,Fxyd1,Gpm6a,Hcn3,Kcnd3,Kcne5,Kcnh2,Kcnh6,Kcnip1,LOC100911440,LOC100911519,LOC103694380,LOC687508,Mmp9,Ppargc1a,Rgs9,Ryr2,Ryr3,S100a1,Scn7a,Slc22a1,Slc25a23,Slc26a2,Slc30a10,Slc4a4,Slc4a7,Slc7a11,Slc8a1,Tnf,Trpm5,Trpv6
GO:0036294	cellular response to decreased oxygen levels	biological_process	3.03677	0.0207253	12	Cbl,Ccna2,Ccnb1,Clca1,Cpeb1,Cpeb4,Fabp1,Myocd,Ppargc1a,S100b,Sfrp1,Slc8a1
GO:0007275	multicellular organism development	biological_process	1.26466	0.021367	156	A1cf,Abcb1b,Acan,Actn2,Adamtsl2,Adcy1,Adipoq,Adm2,Aldh1a1,Alpl,Ank2,Apba2,Aqp5,Ar,Ash1l,Atp1a3,Atp2b3,Atp2b4,Atxn1,Basp1,Birc6,Bmp8b,C3,Calb1,Cbl,Cckar,Ccna2,Ccnb1,Ccnf,Cd79b,Cd8a,Chac1,Chad,Chrdl1,Clic5,Clmn,Cma1,Col11a1,Col4a3,Cpeb1,Crlf1,Cryaa,Ctf1,Cttnbp2,Cxcl14,Cyp1b1,Cytl1,Dbp,Dhcr7,Dmd,Ephx1,Epop,Faim,Fat4,Fgf23,Fgfr2,Fmn1,Foxn3,Foxp2,Frem2,Gal3st1,Gata4,Gbx2,Gfap,Gpm6a,Gsc,Gsta3,Hdac11,Hh…
GO:0007167	enzyme linked receptor protein signaling pathway	biological_process	1.76221	0.0215858	37	Adamtsl2,Adipoq,Angptl1,Ar,Atxn7,Bmp8a,Bmp8b,Cbl,Chrdl1,Col4a3,Ctf1,Fat4,Fgf23,Fgfr2,Gata4,Gdf15,Hhip,Hipk2,Igfbp3,Itga1,Kiaa0408L,LOC103691556,Lifr,Ltk,Mmp9,Myocd,Npnt,Nppc,Ntrk2,Pbld1,Phip,Ryr2,Sfrp1,Sfrp4,Slc30a10,Sox9,Vps25
GO:0086009	membrane repolarization	biological_process	5.49902	0.0225081	6	Akap6,Ank2,Cacna2d1,Kcnd3,Kcne5,Kcnh2
GO:0032870	cellular response to hormone stimulus	biological_process	1.84548	0.0228438	32	AABR07031756.2,Abcb1b,Actn2,Adipoq,Ar,Atp1a2,Atp1a3,Ccna2,Cpeb1,Dennd4c,Ephx1,Fbxo32,Fgf23,Gdf15,Hmgcs1,Kiaa0408L,Mzb1,Nr1d1,Nr1d2,Ntrk2,Phip,Pklr,Pla2g1b,Ppargc1a,Prkaa2,Reg1a,Rorc,Sfrp1,Slc30a10,Slit3,Srd5a1,Trh
GO:0086001	cardiac muscle cell action potential	biological_process	4.6544	0.0229009	7	Ank2,Cacna2d1,Dmd,Kcnd3,Kcne5,Kcnh2,Ryr2
GO:0055085	transmembrane transport	biological_process	1.50822	0.0255556	62	Abca8a,Abcb1b,Actn2,Adipoq,Akap6,Ank2,Aqp5,Aqp8,Aspn,Atp1a2,Atp1a3,Atp2b3,Atp2b4,Bhlha15,C3,Cacna1e,Cacna2d1,Cd19,Chrnb4,Clca1,Clic5,Cox6a2,Cracr2a,Dmd,Fxyd1,Gpm6a,Hcn3,Itln1,Kcnd3,Kcne5,Kcnh2,Kcnh6,Kcnip1,LOC100911440,LOC100911519,LOC103694380,LOC687508,Mfsd2a,Mmp9,Mzb1,Pla2g1b,Ppargc1a,Rgs9,Ryr2,Ryr3,S100a1,Scn7a,Slc13a3,Slc22a1,Slc22a3,Slc25a23,Slc26a2,Slc2a12,Slc30a10,Slc4a4,Slc4a7,Slc7a10,Sl…
GO:1904064	positive regulation of cation transmembrane transport	biological_process	3.1346	0.0256308	11	Actn2,Akap6,Cd19,Cracr2a,Dmd,Fxyd1,Kcne5,Kcnh2,Rgs9,Ryr2,S100a1
GO:0050786	RAGE receptor binding	molecular_function	14.5331	0.0259114	3	S100a8,S100a9,S100b
GO:0061476	response to anticoagulant	biological_process	14.5331	0.0259114	3	Reg1a,Sfrp1,Sox9
GO:0050729	positive regulation of inflammatory response	biological_process	3.63328	0.0259114	9	C3,Il17d,LOC103694380,Lbp,Ldlr,S100a8,S100a9,Tnf,Tnfsf18
GO:0008610	lipid biosynthetic process	biological_process	1.96803	0.0259114	26	Acsm5,Agmo,Aldh1a1,Apoc3,C3,Cyb5r2,Cyp51,Dhcr7,Gal3st1,Hmgcs1,Hmgcs2,Idi1,Ldlr,Lss,Nr1d1,Pla2g1b,Plp1,Ppargc1a,Prkaa2,Scd,Scd2,Sqle,Srd5a1,Thrsp,Timp1,Zbtb20
GO:0004421	hydroxymethylglutaryl-CoA synthase activity	molecular_function	33.9106	0.0259114	2	Hmgcs1,Hmgcs2
GO:0014034	neural crest cell fate commitment	biological_process	33.9106	0.0259114	2	Gsc,Sfrp1
GO:0032603	fractalkine production	biological_process	33.9106	0.0259114	2	LOC103694380,Tnf
GO:0032644	regulation of fractalkine production	biological_process	33.9106	0.0259114	2	LOC103694380,Tnf
GO:0032724	positive regulation of fractalkine production	biological_process	33.9106	0.0259114	2	LOC103694380,Tnf
GO:0050751	fractalkine biosynthetic process	biological_process	33.9106	0.0259114	2	LOC103694380,Tnf
GO:0050752	regulation of fractalkine biosynthetic process	biological_process	33.9106	0.0259114	2	LOC103694380,Tnf
GO:0050754	positive regulation of fractalkine biosynthetic process	biological_process	33.9106	0.0259114	2	LOC103694380,Tnf
GO:0050756	fractalkine metabolic process	biological_process	33.9106	0.0259114	2	LOC103694380,Tnf
GO:0051978	lysophospholipid transporter activity	molecular_function	33.9106	0.0259114	2	Fabp1,Mfsd2a
GO:0070488	neutrophil aggregation	biological_process	33.9106	0.0259114	2	S100a8,S100a9
GO:0098907	regulation of SA node cell action potential	biological_process	33.9106	0.0259114	2	Ank2,Ryr2
GO:1903699	tarsal gland development	biological_process	33.9106	0.0259114	2	Ash1l,Scd
GO:0045861	negative regulation of proteolysis	biological_process	2.15143	0.0261273	21	Birc6,C3,Chac1,Cryaa,Fabp1,Hipk2,Il1r2,Itih3,Itih4,Kng1,LOC108348172,Mmp9,Pbk,Serpina1,Serpinb2,Serpini2,Spink1l,Timp1,Wfdc18,Wfdc2
GO:0015075	ion transmembrane transporter activity	molecular_function	1.6913	0.0261273	40	Atp1a2,Atp1a3,Atp2b3,Atp2b4,Cacna1e,Cacna2d1,Chrnb4,Clca1,Clic5,Cox6a2,Fxyd1,Gpm6a,Hcn3,Htr1b,Kcnd3,Kcne5,Kcnh2,Kcnh6,LOC100911440,LOC100911519,LOC687508,Mfsd2a,Ryr2,Ryr3,Scn7a,Slc13a3,Slc22a1,Slc22a3,Slc25a23,Slc26a2,Slc2a12,Slc30a10,Slc4a4,Slc4a7,Slc7a10,Slc7a11,Slc8a1,Tfrc,Trpm5,Trpv6
GO:0098772	molecular function regulator	molecular_function	1.4734	0.0287793	66	AABR07011057.2,Adipoq,Adm2,Apoc3,Arfgef3,Arhgef33,Asap2,Atp2b4,Birc6,Bmp8a,Bmp8b,C3,Calcb,Ccna2,Ccnb1,Ccne1,Ccnf,Clps,Crlf1,Ctf1,Cxcl14,Dennd1b,Dennd4c,Fgf23,Fxyd1,Gdf15,Guca2a,Igfbp3,Il17d,Inafm1,Itih3,Itih4,Kcne5,Kcnip1,Kng1,LOC103694380,LOC108348172,Ltc4s,Nppc,Pomc,Ppp1r14a,Ppp1r1a,Ppp2r2c,Ppy,Prl2a1,Psd,Racgap1,Rcan2,Reg1a,Retnla,Retnlb,Rgs9,Rictor,Serpina1,Serpinb2,Serpini2,Sh3rf2,Spink1l,Ss…
GO:1903522	regulation of blood circulation	biological_process	2.51812	0.0293405	15	Ank2,Atp1a2,Atp2b4,Cacna2d1,Dmd,Fgg,Gata4,Kcnd3,Kcne5,Kcnh2,Nmu,Pde5a,Ryr2,S100a1,Slc8a1
GO:0004032	alditol:NADP+ 1-oxidoreductase activity	molecular_function	8.47766	0.0295316	4	Akr1c13,Akr1c19,Akr1cl,Akr7a3
GO:0044110	growth involved in symbiotic interaction	biological_process	8.47766	0.0295316	4	Lbp,Mpo,Pglyrp1,Scd
GO:0044116	growth of symbiont involved in interaction with host	biological_process	8.47766	0.0295316	4	Lbp,Mpo,Pglyrp1,Scd
GO:0044117	growth of symbiont in host	biological_process	8.47766	0.0295316	4	Lbp,Mpo,Pglyrp1,Scd
GO:0042738	exogenous drug catabolic process	biological_process	6.27975	0.0295316	5	Cyp2d2,Cyp2e1,Cyp2j10,Cyp2j4,Cyp2w1
GO:0099622	cardiac muscle cell membrane repolarization	biological_process	6.27975	0.0295316	5	Ank2,Cacna2d1,Kcnd3,Kcne5,Kcnh2
GO:0034764	positive regulation of transmembrane transport	biological_process	2.60851	0.0295552	14	Actn2,Adipoq,Akap6,C3,Cd19,Cracr2a,Dmd,Fxyd1,Itln1,Kcne5,Kcnh2,Rgs9,Ryr2,S100a1
GO:0005179	hormone activity	molecular_function	3.03266	0.0296113	11	Adipoq,Adm2,Calcb,Nppc,Pomc,Ppy,Prl2a1,Retnla,Retnlb,Sst,Trh
GO:0044242	cellular lipid catabolic process	biological_process	2.72122	0.0297419	13	Adipoq,Apoc3,Cel,Ces1d,Crabp1,Cyp1b1,Decr1,Ech1,Eci1,Fabp1,Ldlr,Pla2g4c,Pnliprp2
GO:1904062	regulation of cation transmembrane transport	biological_process	2.26911	0.0311207	18	Actn2,Akap6,Ank2,Atp1a2,Cacna2d1,Cd19,Cracr2a,Dmd,Fxyd1,Kcne5,Kcnh2,Kcnip1,Mmp9,Ppargc1a,Rgs9,Ryr2,S100a1,Slc8a1
GO:0061337	cardiac conduction	biological_process	4.3159	0.0311538	7	Ank2,Cacna2d1,Kcnd3,Kcne5,Kcnh2,Ryr2,Slc8a1
GO:0001501	skeletal system development	biological_process	1.98987	0.0323916	24	Acan,Alpl,Ash1l,Chad,Col11a1,Col4a3,Cytl1,Fat4,Fgfr2,Fmn1,Foxn3,Gsc,Hhip,Hoxd4,Itgb8,Mmp9,Nppc,Sfrp1,Sfrp4,Sox9,Srd5a1,Timp1,Wnt2b,Zbtb16
GO:0044281	small molecule metabolic process	biological_process	1.46281	0.0325593	66	Acsm5,Adcy1,Adipoq,Agmo,Ak5,Aldh1a1,Apoc3,Aspg,Atp1a2,Atp2b4,Calb1,Ccnb1,Ces1d,Cmahp,Crabp1,Cyp1b1,Cyp2d2,Cyp2e1,Cyp2j10,Cyp2j4,Cyp2w1,Cyp51,Decr1,Dhcr7,Dpyd,Ech1,Eci1,Ephx1,Ephx2,Fabp1,Fgf23,Fmo1,Galm,Guca2a,Hmgcs1,Igfbp3,Itih3,Itih4,LOC100359539,LOC687508,Ldlr,Lss,Ltc4s,Macrod1,Mpo,Mthfd2,Ncoa2,Nppc,Nr1d1,Pde5a,Pklr,Pla2g1b,Plp1,Pomc,Ppargc1a,Retsat,Scd,Scd2,Slc25a23,Spock2,Sqle,Srd5a1,Tff3,Tk1…
GO:0015081	sodium ion transmembrane transporter activity	molecular_function	2.98413	0.0329714	11	Atp1a2,Atp1a3,Hcn3,Scn7a,Slc13a3,Slc22a1,Slc22a3,Slc4a4,Slc4a7,Slc8a1,Trpm5
GO:0086002	cardiac muscle cell action potential involved in contraction	biological_process	4.96253	0.0329724	6	Ank2,Cacna2d1,Kcnd3,Kcne5,Kcnh2,Ryr2
GO:0031128	developmental induction	biological_process	6.05547	0.0335263	5	Ar,Hipk2,Sox9,Wnt2b,Wnt3
GO:0071312	cellular response to alkaloid	biological_process	6.05547	0.0335263	5	Abcb1b,Ccna2,Htr1b,Ppargc1a,Ryr2
GO:0070252	actin-mediated cell contraction	biological_process	3.76785	0.0337955	8	Ank2,Atp1a2,Cacna2d1,Gata4,Kcnd3,Kcne5,Kcnh2,Ryr2
GO:0071310	cellular response to organic substance	biological_process	1.39312	0.0340073	82	AABR07031756.2,Abcb1b,Actn2,Adamtsl2,Adipoq,Akap6,Alpl,Aqp8,Ar,Atp1a2,Atp1a3,Atp2b4,Bhlha15,Birc5,Bmp8a,Bmp8b,Cacna2d1,Calb1,Cbl,Ccna2,Ccnb1,Chrdl1,Cma1,Cpeb1,Cpeb4,Crlf1,Cyp1b1,Dennd4c,Dmd,Ephx1,Fat4,Fbxo32,Fgf23,Fgfr2,Fgg,Gata4,Gdf15,Gpr75,Hcn3,Hhip,Hipk2,Hmgcs1,Htr1b,Il1r2,Ina,Kcnd3,Kiaa0408L,LOC103691556,Lbp,Lcn2,Ldlr,Lifr,Ltk,Myocd,Mzb1,Npnt,Nr1d1,Nr1d2,Ntrk2,Pbld1,Phip,Pklr,Pla2g1b,Ppargc1a…
GO:0022890	inorganic cation transmembrane transporter activity	molecular_function	1.84159	0.0340426	29	Atp1a2,Atp1a3,Atp2b3,Atp2b4,Cacna1e,Cacna2d1,Chrnb4,Cox6a2,Gpm6a,Hcn3,Htr1b,Kcnd3,Kcne5,Kcnh2,Kcnh6,LOC687508,Ryr2,Ryr3,Scn7a,Slc13a3,Slc22a1,Slc22a3,Slc2a12,Slc4a4,Slc4a7,Slc8a1,Tfrc,Trpm5,Trpv6
GO:0031642	negative regulation of myelination	biological_process	12.7165	0.0342331	3	Klk8,LOC103694380,Tnf
GO:1902282	voltage-gated potassium channel activity involved in ventricular cardiac muscle cell action potential repolarization	molecular_function	12.7165	0.0342331	3	Kcnd3,Kcne5,Kcnh2
GO:0018904	ether metabolic process	biological_process	7.97897	0.0348344	4	Agmo,Cyp2w1,Ephx1,Ephx2
GO:1990845	adaptive thermogenesis	biological_process	7.97897	0.0348344	4	Adrb3,Bmp8b,Clic5,Ppargc1a
GO:0001657	ureteric bud development	biological_process	3.39106	0.0353713	9	Calb1,Crlf1,Fat4,Fmn1,Gsta3,Npnt,Sfrp1,Sox9,Wnt2b
GO:0006836	neurotransmitter transport	biological_process	2.44548	0.0353713	15	Adora3,Apba2,Atp1a2,Gfap,Htr1b,LOC100911440,LOC103694380,Ntrk2,Slc22a1,Slc22a3,Sncg,Syt1,Tacr2,Tnf,Trh
GO:0043167	ion binding	molecular_function	1.22045	0.0360312	177	AABR07058539.1,Abca8a,Abcb1b,Acadsb,Acan,Acsm5,Actn2,Adamts15,Adcy1,Adipoq,Agmo,Ak5,Alpk2,Alpl,Anxa13,Apba2,Apoc3,Ar,Arl2,Asap2,Ash1l,Aspn,Atp1a2,Atp1a3,Atp2b3,Atp2b4,Cacna1e,Calb1,Calb2,Car11,Car3,Cbl,Cdh6,Chrnb4,Ckm,Col11a1,Cpa1,Cpa2,Cpa3,Cpb1,Cpeb1,Crabp1,Cracr2a,Creld2,Cryaa,Cyb5r2,Cyp11b2,Cyp1b1,Cyp21a1,Cyp27a1,Cyp2d2,Cyp2d5,Cyp2e1,Cyp2j10,Cyp2j4,Cyp2w1,Cyp51,Cyp8b1,Decr1,Dennd1b,Dlk1,Dmd,Ee…
GO:0009410	response to xenobiotic stimulus	biological_process	2.28762	0.0360312	17	Abcb1b,Ccna2,Cyp1b1,Cyp2d2,Cyp2e1,Cyp2j10,Cyp2j4,Cyp2w1,Fbxo32,Gsta4,Htr1b,Ppargc1a,Prss1,Rgs9,Ryr2,Srd5a1,Sult1a1
GO:0001504	neurotransmitter uptake	biological_process	5.84666	0.0373732	5	Atp1a2,Gfap,LOC103694380,Slc22a3,Tnf
GO:0086005	ventricular cardiac muscle cell action potential	biological_process	5.84666	0.0373732	5	Ank2,Kcnd3,Kcne5,Kcnh2,Ryr2
GO:0072163	mesonephric epithelium development	biological_process	3.3538	0.0373732	9	Calb1,Crlf1,Fat4,Fmn1,Gsta3,Npnt,Sfrp1,Sox9,Wnt2b
GO:0072164	mesonephric tubule development	biological_process	3.3538	0.0373732	9	Calb1,Crlf1,Fat4,Fmn1,Gsta3,Npnt,Sfrp1,Sox9,Wnt2b
GO:0048018	receptor ligand activity	molecular_function	1.95638	0.0374411	24	Adipoq,Adm2,Bmp8a,Bmp8b,Calcb,Crlf1,Ctf1,Cxcl14,Fgf23,Gdf15,Il17d,LOC103694380,Nppc,Pomc,Ppy,Prl2a1,Reg1a,Retnla,Retnlb,Sst,Timp1,Tnf,Trh,Wnt3
GO:0010466	negative regulation of peptidase activity	biological_process	2.26961	0.0383348	17	Birc6,C3,Cryaa,Fabp1,Itih3,Itih4,Kng1,LOC108348172,Mmp9,Serpina1,Serpinb2,Serpini2,Spink1l,Timp1,Wfdc18,Wfdc2
GO:0051049	regulation of transport	biological_process	1.45656	0.0393531	64	Abcb1b,Actn2,Adipoq,Adora3,Akap6,Ank2,Apoc3,Atp1a2,Birc5,C3,Cacna1e,Cacna2d1,Caly,Cbl,Cd19,Cd22,Chga,Clic5,Cracr2a,Cyp2j4,Dmd,Fgf23,Fgg,Fxyd1,Gfap,Hcn3,Htr1b,Il1r2,Itln1,Kcnd3,Kcne5,Kcnh2,Kcnh6,Kcnip1,LOC103694380,Ldlr,Mib1,Mmp9,Myom1,Mzb1,Nmu,Nr1d1,Ntrk2,Pla2g1b,Pomc,Ppargc1a,Pram1,Prl2a1,Rgs9,Rit2,Ryr2,S100a1,Scn7a,Sfrp1,Sfrp4,Slc30a10,Slc8a1,Sncg,Sycn,Syt1,Tacr2,Thoc2,Tnf,Trh
GO:0015893	drug transport	biological_process	2.49868	0.0395138	14	Abcb1b,Amn,Aqp5,Htr1b,LOC100911440,LOC103694380,Ngb,Slc22a1,Slc22a3,Slc7a10,Sncg,Syt1,Tacr2,Tnf
GO:0016125	sterol metabolic process	biological_process	3.31734	0.0395138	9	Cyb5r2,Cyp51,Dhcr7,Ephx2,Hmgcs1,Hmgcs2,Ldlr,Lss,Sqle
GO:0010951	negative regulation of endopeptidase activity	biological_process	2.32863	0.0395138	16	Birc6,C3,Cryaa,Fabp1,Itih3,Itih4,Kng1,LOC108348172,Mmp9,Serpina1,Serpinb2,Serpini2,Spink1l,Timp1,Wfdc2
GO:0010469	regulation of signaling receptor activity	biological_process	1.86095	0.0395544	27	Adipoq,Adm2,Bmp8a,Bmp8b,Calcb,Cbl,Crlf1,Ctf1,Fgf23,Gdf15,Il17d,LOC103694380,Nppc,Pomc,Ppargc1a,Ppy,Prl2a1,Reg1a,Retnla,Retnlb,Rgs9,Sst,Timp1,Tnf,Trh,Vps25,Wnt3
GO:0034767	positive regulation of ion transmembrane transport	biological_process	2.86936	0.0405574	11	Actn2,Akap6,Cd19,Cracr2a,Dmd,Fxyd1,Kcne5,Kcnh2,Rgs9,Ryr2,S100a1
GO:0072073	kidney epithelium development	biological_process	2.86936	0.0405574	11	Adipoq,Basp1,Calb1,Crlf1,Fat4,Fmn1,Gsta3,Npnt,Sfrp1,Sox9,Wnt2b
GO:0004806	triglyceride lipase activity	molecular_function	7.53569	0.0405574	4	Ces1d,Pnlip,Pnliprp1,Pnliprp2
GO:0014874	response to stimulus involved in regulation of muscle adaptation	biological_process	7.53569	0.0405574	4	Dmd,Fbxo32,Ppargc1a,Trim63
GO:0016628	oxidoreductase activity, acting on the CH-CH group of donors, NAD or NADP as acceptor	molecular_function	7.53569	0.0405574	4	Decr1,Dhcr7,Dpyd,Srd5a1
GO:0071453	cellular response to oxygen levels	biological_process	2.71285	0.0407899	12	Cbl,Ccna2,Ccnb1,Clca1,Cpeb1,Cpeb4,Fabp1,Myocd,Ppargc1a,S100b,Sfrp1,Slc8a1
GO:0051248	negative regulation of protein metabolic process	biological_process	1.58132	0.0409994	45	Adipoq,Ash1l,Bex4,Birc6,C3,Cbl,Ccnb1,Chac1,Cpeb1,Cpeb4,Cryaa,Dmd,Fabp1,Hipk2,Igfbp3,Il1r2,Isg15,Itih3,Itih4,Itm2a,Kng1,LOC108348172,Ldlr,Mmp9,Myocd,Pbk,Pbld1,Ppargc1a,Ppp1r14a,Ppp1r1a,Prkaa2,Rasd2,Rnf128,Serpina1,Serpinb2,Serpini2,Sfrp1,Sh3rf2,Spink1l,Spopl,Timp1,Vps25,Wfdc18,Wfdc2
GO:0051952	regulation of amine transport	biological_process	3.28167	0.0409994	9	Adora3,Chga,Htr1b,LOC103694380,Sncg,Syt1,Tacr2,Tnf,Trh
GO:0060306	regulation of membrane repolarization	biological_process	5.65177	0.0409994	5	Akap6,Ank2,Cacna2d1,Kcne5,Kcnh2
GO:0097066	response to thyroid hormone	biological_process	5.65177	0.0409994	5	Abcb1b,Atp1a3,Cfb,Ppargc1a
GO:0070588	calcium ion transmembrane transport	biological_process	2.23442	0.0426951	17	Ank2,Atp1a2,Atp2b3,Atp2b4,Bhlha15,Cacna1e,Cacna2d1,Cd19,Cracr2a,Dmd,Gpm6a,Ryr2,Ryr3,S100a1,Slc25a23,Slc8a1,Trpv6
GO:0098655	cation transmembrane transport	biological_process	1.67921	0.0426951	36	Actn2,Akap6,Ank2,Atp1a2,Atp1a3,Atp2b3,Atp2b4,Bhlha15,Cacna1e,Cacna2d1,Cd19,Cox6a2,Cracr2a,Dmd,Fxyd1,Gpm6a,Hcn3,Kcnd3,Kcne5,Kcnh2,Kcnh6,Kcnip1,LOC687508,Mmp9,Ppargc1a,Rgs9,Ryr2,Ryr3,S100a1,Scn7a,Slc22a1,Slc25a23,Slc30a10,Slc8a1,Trpm5,Trpv6
GO:0014070	response to organic cyclic compound	biological_process	1.57317	0.0443525	45	AABR07031756.2,Abcb1b,Adipoq,Akap6,Aldh3a1,Alpl,Aqp8,Ar,Atp1a2,Atp2b4,Cbl,Ccna2,Ccnb1,Cryaa,Cyp1b1,Cyp2j4,Ephx1,Fbxo32,Fgf23,Foxp2,Hcn3,Hmgcs1,Htr1b,Ncoa2,Nefl,Nr1d1,Nr1d2,Ntrk2,Pklr,Ppargc1a,Prss1,Reg1a,Rgs9,Rorc,Ryr2,S100b,Sfrp1,Slc8a1,Slit3,Srd5a1,Sst,Sult1a1,Trh,Trim63,Usp18
GO:0002024	diet induced thermogenesis	biological_process	11.3035	0.044412	3	Adrb3,Bmp8b,Clic5
GO:0005883	neurofilament	cellular_component	11.3035	0.044412	3	Dmd,Ina,Nefl
GO:0047498	calcium-dependent phospholipase A2 activity	molecular_function	11.3035	0.044412	3	Pla2g1b,Pla2g2a,Pla2g2d
GO:0042391	regulation of membrane potential	biological_process	2.02308	0.044517	21	Actn2,Akap6,Ank2,Atp1a3,Cacna2d1,Chrnb4,Dmd,Fxyd1,Hcn3,Kcnd3,Kcne5,Kcnh2,Kmt2a,LOC103694380,Ntrk2,Ryr2,Scn7a,Slc26a2,Slc8a1,Sod2,Tnf
GO:0008285	negative regulation of cell proliferation	biological_process	1.81202	0.0451736	28	Adipoq,Ar,Clmn,Cpeb1,Cyp1b1,Fgfr2,Gkn3,Igfbp3,Itga1,Kmt2a,LOC103694380,Lims2,Myocd,Nppc,Pbld1,Pde5a,Pla2g2d,Ppargc1a,Rarres1,Reg1a,Scin,Sfrp1,Sfrp4,Slit3,Sod2,Sox9,Tnf,Zbtb16
GO:0008324	cation transmembrane transporter activity	molecular_function	1.76925	0.045226	30	Atp1a2,Atp1a3,Atp2b3,Atp2b4,Cacna1e,Cacna2d1,Chrnb4,Cox6a2,Gpm6a,Hcn3,Htr1b,Kcnd3,Kcne5,Kcnh2,Kcnh6,LOC687508,Ryr2,Ryr3,Scn7a,Slc13a3,Slc22a1,Slc22a3,Slc2a12,Slc30a10,Slc4a4,Slc4a7,Slc8a1,Tfrc,Trpm5,Trpv6
GO:0051239	regulation of multicellular organismal process	biological_process	1.33255	0.045226	96	Abcb1b,Adipoq,Adm2,Adrb3,Ank2,Apoc3,Ar,Atp1a2,Atp2b4,C3,Cacna2d1,Ccnb1,Chad,Chrnb4,Cma1,Col4a3,Cpeb1,Cxcl17,Cyp1b1,Cyp2j4,Dmd,Faim,Fat4,Fbxo32,Fgf23,Fgg,Foxp2,Gata4,Gdf15,Gfap,Hipk2,Il17d,Il1r2,Isg15,Itgb8,Kcnd3,Kcne5,Kcnh2,Klk8,Kng1,LOC103694380,Lbp,Ldlr,Lims2,Ltk,Mib1,Mitf,Mmp8,Mmp9,Myocd,Nefl,Nmu,Npnt,Nppc,Nr1d2,Ntrk2,Oscar,Pbld1,Pde5a,Per3,Pglyrp1,Plg,Pomc,Ppargc1a,Prl2a1,Ptprd,Racgap1,Reg1a,…
GO:0035637	multicellular organismal signaling	biological_process	2.97462	0.0468234	10	Ank2,Cacna2d1,Chrnb4,Kcnd3,Kcne5,Kcnh2,Ntrk2,Ryr2,Scn7a,Slc8a1
GO:0010880	regulation of release of sequestered calcium ion into cytosol by sarcoplasmic reticulum	biological_process	7.13908	0.0472536	4	Ank2,Dmd,Ryr2,Slc8a1
GO:0015837	amine transport	biological_process	3.17912	0.0487429	9	Adora3,Chga,Htr1b,LOC103694380,Sncg,Syt1,Tacr2,Tnf,Trh
GO:0007610	behavior	biological_process	1.77831	0.0488669	29	Adcy1,Adm2,Adrb3,Apba2,Atp1a2,Atp1a3,Atxn1,Calb1,Chrnb4,Fen1,Foxp2,Gdf15,Hipk2,Htr1b,Klk8,Kmt2a,Ldlr,Ncoa2,Nmu,Ntrk2,Per3,Rasd2,S100b,Sncg,Sod2,Srd5a1,Tacr2,Tmod2,Trh
