# Supplementary material for: Integrative transcriptomic and metabonomic profiling analyses reveal the molecular mechanism of Chinese traditional medicine huankuile suspension on TNBS-induced ulcerative colitis
Source: Aging (Albany NY). 2021 Feb 1;13(4):5087–103. doi: 10.18632/aging.202427 (PMC7950284; doi:10.18632/aging.202427)
Supplement: Supplementary Table 3 [file aging-13-202427-s003.xls]

## Sheet: Supplementary Table 3
Supplementary Table 3. The list of KEGG enrichment analysis of upregulated genes between HKL treated UC samples and water treated UC samples.
ID	Description	Class	Enrich_factor	Pvalue	FDR	GeneCount	GeneID
rno05412	Arrhythmogenic right ventricular cardiomyopathy (ARVC)	Human Diseases	5.88017	0.000165666	0.0199492	7	Itgb8,Itga7,Slc8a1,Ryr2,Actn2,Cacna2d1,Itga1
rno00980	Metabolism of xenobiotics by cytochrome P450	Metabolism	6.35497	0.000320063	0.0199492	6	Aldh3a1,Ephx1,Akr7a2,Akr7a3,Gsta4,Gsta3
rno04976	Bile secretion	Organismal Systems	5.16742	0.000374351	0.0199492	7	Slc4a4,Ephx1,Atp1a2,Abcb1b,Aqp8,Slc22a1,Adcy1
rno04261	Adrenergic signaling in cardiomyocytes	Organismal Systems	3.58246	0.00045229	0.0199492	10	Atp2b4,Atp1a2,Slc8a1,Ryr2,Scn7a,Cacna2d1,Ppp1r1a,Ppp2r2c,Adcy1,Atp2b3
rno04972	Pancreatic secretion	Organismal Systems	4.19109	0.00060419	0.0199492	8	Atp2b4,Slc4a4,Atp1a2,Cpa3,Ryr2,Adcy1,Clca1,Atp2b3
rno03320	PPAR signaling pathway	Organismal Systems	4.60878	0.000754835	0.0199492	7	Adipoq,Fabp1,Scd,Cyp27a1,Hmgcs2,Cyp8b1,Apoc3
rno05410	Hypertrophic cardiomyopathy (HCM)	Human Diseases	4.60878	0.000754835	0.0199492	7	Itgb8,Prkaa2,Itga7,Slc8a1,Ryr2,Cacna2d1,Itga1
rno05414	Dilated cardiomyopathy	Human Diseases	4.42922	0.00095851	0.0221655	7	Itgb8,Itga7,Slc8a1,Ryr2,Cacna2d1,Itga1,Adcy1
rno00140	Steroid hormone biosynthesis	Metabolism	4.87214	0.00135235	0.0277984	6	Cyp21a1,Cyp2d2,Hsd17b2,Srd5a1,Cyp2d5,LOC108348266
rno04913	Ovarian steroidogenesis	Organismal Systems	5.29581	0.00236352	0.0369654	5	Hsd17b2,Pla2g4c,Cyp2j4,Cyp2j10,Adcy1
rno04614	Renin-angiotensin system	Organismal Systems	6.9602	0.00237344	0.0369654	4	Cpa3,Cma1,Mcpt8l2,LOC108348118
rno05204	Chemical carcinogenesis	Human Diseases	4.36311	0.00239776	0.0369654	6	Aldh3a1,Ephx1,Sult1a1,Gsta4,LOC108348266,Gsta3
rno00590	Arachidonic acid metabolism	Metabolism	4.23665	0.00278559	0.0395936	6	Ltc4s,Ephx2,Pla2g4c,Cyp2j4,LOC108348266,Cyp2j10
rno04970	Salivary secretion	Organismal Systems	4.17612	0.00299628	0.0395936	6	Atp2b4,Atp1a2,Adrb3,Trpv6,Adcy1,Atp2b3
rno04726	Serotonergic synapse	Organismal Systems	3.1289	0.00690647	0.0851797	7	Cyp2d2,Htr1b,Gng7,Pla2g4c,Cyp2d5,Cyp2j4,Cyp2j10
rno04512	ECM-receptor interaction	Environmental Information Processing	4.06012	0.00749312	0.0866392	5	Chad,Itgb8,Itga7,Col4a3,Itga1
rno04020	Calcium signaling pathway	Environmental Information Processing	2.54938	0.00867925	0.0944507	9	Cacna1e,Atp2b4,Slc8a1,Pde1c,Adrb3,Ryr2,Tacr2,Adcy1,Atp2b3
rno04978	Mineral absorption	Organismal Systems	4.64014	0.0104009	0.106898	4	S100g,Atp1a2,Slc8a1,Trpv6
rno04022	cGMP-PKG signaling pathway	Environmental Information Processing	2.53098	0.0136369	0.132781	8	Atp2b4,Atp1a2,Slc8a1,Adrb3,Pde5a,Adora3,Adcy1,Atp2b3
rno04024	cAMP signaling pathway	Environmental Information Processing	2.34488	0.0144915	0.134046	9	Sox9,Atp2b4,Atp1a2,Htr1b,Ryr2,Hhip,Fxyd1,Adcy1,Atp2b3
rno04710	Circadian rhythm	Organismal Systems	5.41349	0.0172675	0.152119	3	Prkaa2,Nr1d1,Per3
rno00591	Linoleic acid metabolism	Metabolism	4.56763	0.0271917	0.228657	3	Pla2g4c,Cyp2j4,Cyp2j10
rno04916	Melanogenesis	Organismal Systems	2.70675	0.0371467	0.298789	5	Wnt3,Mitf,Pomc,Wnt2b,Adcy1
rno00120	Primary bile acid biosynthesis	Metabolism	6.09018	0.041589	0.320582	2	Cyp27a1,Cyp8b1
rno04371	Apelin signaling pathway	Environmental Information Processing	2.32007	0.0446052	0.330078	6	Ppargc1a,Prkaa2,Slc8a1,Ryr2,Gng7,Adcy1
rno04920	Adipocytokine signaling pathway	Organismal Systems	2.86597	0.0504748	0.359147	4	Adipoq,Ppargc1a,Prkaa2,Pomc
rno04930	Type II diabetes mellitus	Human Diseases	3.2481	0.0642902	0.406546	3	Adipoq,Cacna1e,Pklr
rno04260	Cardiac muscle contraction	Organismal Systems	2.63359	0.0650244	0.406546	4	Atp1a2,Slc8a1,Ryr2,Cacna2d1
rno04974	Protein digestion and absorption	Organismal Systems	2.59848	0.0676417	0.406546	4	Atp1a2,Slc8a1,Cpa3,Col4a3
rno04961	Endocrine and other factor-regulated calcium reabsorption	Organismal Systems	3.17748	0.067782	0.406546	3	Atp1a2,Calb1,Slc8a1
rno04964	Proximal tubule bicarbonate reclamation	Organismal Systems	4.64014	0.0681239	0.406546	2	Slc4a4,Atp1a2
rno00982	Drug metabolism - cytochrome P450	Metabolism	3.10988	0.0713587	0.412543	3	Aldh3a1,Gsta4,Gsta3
rno04320	Dorso-ventral axis formation	Organismal Systems	4.42922	0.073957	0.414607	2	Cpeb1,Cpeb4
rno05217	Basal cell carcinoma	Human Diseases	2.92329	0.0825832	0.437267	3	Wnt3,Wnt2b,Hhip
rno00650	Butanoate metabolism	Metabolism	4.06012	0.0860756	0.437267	2	Hmgcs2,Acsm5
rno04152	AMPK signaling pathway	Environmental Information Processing	2.11832	0.087167	0.437267	5	Adipoq,Ppargc1a,Prkaa2,Scd,Ppp2r2c
rno05146	Amoebiasis	Human Diseases	2.37666	0.0874535	0.437267	4	Col4a3,C8g,Mcpt8l2,Adcy1
rno04211	Longevity regulating pathway	Organismal Systems	2.32007	0.0935792	0.455583	4	Adipoq,Ppargc1a,Prkaa2,Adcy1
rno00410	beta-Alanine metabolism	Metabolism	3.7478	0.0987413	0.468388	2	Aldh3a1,Dpyd
rno04713	Circadian entrainment	Organismal Systems	2.24007	0.103139	0.477019	4	Ryr2,Per3,Gng7,Adcy1
rno00010	Glycolysis / Gluconeogenesis	Metabolism	2.56429	0.111449	0.502881	3	Aldh3a1,Galm,Pklr
rno00830	Retinol metabolism	Metabolism	2.52007	0.115854	0.510308	3	Retsat,Aldh1a1,LOC108348266
rno04151	PI3K-Akt signaling pathway	Environmental Information Processing	1.50169	0.145305	0.625148	9	Chad,Itgb8,Prkaa2,Itga7,Col4a3,Fgfr2,Gng7,Itga1,Ppp2r2c
rno04921	Oxytocin signaling pathway	Organismal Systems	1.76527	0.153551	0.628677	5	Prkaa2,Ryr2,Pla2g4c,Cacna2d1,Adcy1
rno00983	Drug metabolism - other enzymes	Metabolism	2.86597	0.153662	0.628677	2	Ces1d,Dpyd
rno04924	Renin secretion	Organismal Systems	2.18156	0.158197	0.628677	3	Pde1c,Adrb3,Clca1
rno04750	Inflammatory mediator regulation of TRP channels	Organismal Systems	1.89209	0.160937	0.628677	4	Pla2g4c,Cyp2j4,Cyp2j10,Adcy1
rno04971	Gastric acid secretion	Organismal Systems	2.14947	0.163169	0.628677	3	Sst,Atp1a2,Adcy1
rno04114	Oocyte meiosis	Cellular Processes	1.85605	0.168873	0.628677	4	Ar,Cpeb1,Cpeb4,Adcy1
rno00072	Synthesis and degradation of ketone bodies	Metabolism	5.41349	0.170354	0.628677	1	Hmgcs2
rno04960	Aldosterone-regulated sodium reabsorption	Organismal Systems	2.63359	0.175537	0.628677	2	Atp1a2,Nr3c2
rno04919	Thyroid hormone signaling pathway	Organismal Systems	1.82136	0.176946	0.628677	4	Atp1a2,Ncoa2,Rcan2,Dio1
rno02010	ABC transporters	Environmental Information Processing	2.56429	0.182937	0.628677	2	Abca8a,Abcb1b
rno05322	Systemic lupus erythematosus	Human Diseases	2.03006	0.183506	0.628677	3	Trove2,C8g,Mcpt8l2
rno05200	Pathways in cancer	Human Diseases	1.38021	0.188048	0.628943	10	Wnt3,Ar,Mitf,Wnt2b,Col4a3,Fgfr2,Hhip,Gng7,Zbtb16,Adcy1
rno04340	Hedgehog signaling pathway	Environmental Information Processing	2.49853	0.190383	0.628943	2	Spopl,Hhip
rno00565	Ether lipid metabolism	Metabolism	2.43607	0.197868	0.642204	2	Pla2g4c,Gal3st1
rno00071	Fatty acid degradation	Metabolism	2.32007	0.212942	0.679213	2	Eci1,Acadsb
rno00230	Purine metabolism	Metabolism	1.54182	0.223977	0.685318	5	Pde1c,Pde5a,Pklr,Ak5,Adcy1
rno04911	Insulin secretion	Organismal Systems	1.82705	0.22597	0.685318	3	Atp1a2,Ryr2,Adcy1
rno04914	Progesterone-mediated oocyte maturation	Organismal Systems	1.82705	0.22597	0.685318	3	Cpeb1,Cpeb4,Adcy1
rno04742	Taste transduction	Organismal Systems	1.8045	0.231412	0.690503	3	Pde1c,Htr1b,Trpm5
rno00730	Thiamine metabolism	Metabolism	3.7478	0.236498	0.694478	1	Ak5
rno00520	Amino sugar and nucleotide sugar metabolism	Metabolism	2.11832	0.243378	0.69719	2	Cmahp,Cyb5r2
rno04910	Insulin signaling pathway	Organismal Systems	1.57166	0.250113	0.69719	4	Ppargc1a,Prkaa2,Pklr,Pygm
rno00280	Valine, leucine and isoleucine degradation	Metabolism	2.07325	0.251024	0.69719	2	Hmgcs2,Acadsb
rno01212	Fatty acid metabolism	Metabolism	2.03006	0.258676	0.69719	2	Scd,Acadsb
rno05032	Morphine addiction	Human Diseases	1.69958	0.258958	0.69719	3	Pde1c,Gng7,Adcy1
rno04550	Signaling pathways regulating pluripotency of stem cells	Cellular Processes	1.52254	0.268235	0.69719	4	Wnt3,Lifr,Wnt2b,Fgfr2
rno05014	Amyotrophic lateral sclerosis (ALS)	Human Diseases	1.94886	0.273988	0.69719	2	Nefl,Prph
rno04922	Glucagon signaling pathway	Organismal Systems	1.6423	0.275696	0.69719	3	Ppargc1a,Prkaa2,Pygm
rno05231	Choline metabolism in cancer	Human Diseases	1.6423	0.275696	0.69719	3	Slc22a1,Slc22a3,Pla2g4c
rno04510	Focal adhesion	Cellular Processes	1.41632	0.278132	0.69719	5	Chad,Itgb8,Itga7,Col4a3,Itga1
rno00480	Glutathione metabolism	Metabolism	1.91064	0.281641	0.69719	2	Gsta4,Gsta3
rno00770	Pantothenate and CoA biosynthesis	Metabolism	3.04509	0.282645	0.69719	1	Dpyd
rno04923	Regulation of lipolysis in adipocytes	Organismal Systems	1.8739	0.289288	0.704189	2	Adrb3,Adcy1
rno00360	Phenylalanine metabolism	Metabolism	2.86597	0.297403	0.705378	1	Aldh3a1
rno00910	Nitrogen metabolism	Metabolism	2.86597	0.297403	0.705378	1	Car3
rno04390	Hippo signaling pathway	Environmental Information Processing	1.41222	0.314445	0.735843	4	Wnt3,Wnt2b,Bmp8a,Ppp2r2c
rno00592	alpha-Linolenic acid metabolism	Metabolism	2.56429	0.326021	0.735843	1	Pla2g4c
rno05202	Transcriptional misregulation in cancer	Human Diseases	1.36284	0.337847	0.735843	4	Aff1,Mpo,Zbtb16,Igfbp3
rno04721	Synaptic vesicle cycle	Organismal Systems	1.65157	0.342416	0.735843	2	Syt1,Rims1
rno04931	Insulin resistance	Human Diseases	1.43298	0.349023	0.735843	3	Ppargc1a,Prkaa2,Pygm
rno04213	Longevity regulating pathway - multiple species	Organismal Systems	1.62405	0.349918	0.735843	2	Prkaa2,Adcy1
rno01100	Metabolic pathways	Metabolism	1.08641	0.353332	0.735843	26	St6galnac1,Cyp21a1,Aldh3a1,Ltc4s,Mgat5,Galm,Hsd17b2,Ces1d,Ckm,Dpyd,Cyp27a1,Ephx2,Aldh1a1,Hmgcs2,Cyp8b1,Pklr,Acadsb,Pygm,Pla2g4c,Nmnat2,Cyp2j4,Acsm5,LOC108348266,Gal3st1,Cyp2j10,Ak5
rno00340	Histidine metabolism	Metabolism	2.32007	0.353481	0.735843	1	Aldh3a1
rno00900	Terpenoid backbone biosynthesis	Metabolism	2.32007	0.353481	0.735843	1	Hmgcs2
rno04810	Regulation of actin cytoskeleton	Cellular Processes	1.26879	0.359226	0.735843	5	Scin,Itgb8,Itga7,Fgfr2,Itga1
rno04664	Fc epsilon RI signaling pathway	Organismal Systems	1.57166	0.364834	0.735843	2	Fcer1a,Pla2g4c
rno04720	Long-term potentiation	Organismal Systems	1.57166	0.364834	0.735843	2	Ppp1r1a,Adcy1
rno04724	Glutamatergic synapse	Organismal Systems	1.39204	0.365933	0.735843	3	Gng7,Pla2g4c,Adcy1
rno04725	Cholinergic synapse	Organismal Systems	1.39204	0.365933	0.735843	3	Chrnb4,Gng7,Adcy1
rno04392	Hippo signaling pathway -multiple species	Environmental Information Processing	2.11832	0.37983	0.748778	1	Fat4
rno00512	Mucin type O-glycan biosynthesis	Metabolism	2.03006	0.392602	0.748778	1	St6galnac1
rno01040	Biosynthesis of unsaturated fatty acids	Metabolism	2.03006	0.392602	0.748778	1	Scd
rno04744	Phototransduction	Organismal Systems	2.03006	0.392602	0.748778	1	Rgs9
rno05310	Asthma	Human Diseases	2.03006	0.392602	0.748778	1	Fcer1a
rno04270	Vascular smooth muscle contraction	Organismal Systems	1.3168	0.399516	0.754188	3	Ppp1r14a,Pla2g4c,Adcy1
rno04918	Thyroid hormone synthesis	Organismal Systems	1.41222	0.415931	0.764486	2	Atp1a2,Adcy1
rno00500	Starch and sucrose metabolism	Metabolism	1.8739	0.417368	0.764486	1	Pygm
rno04950	Maturity onset diabetes of the young	Human Diseases	1.8739	0.417368	0.764486	1	Pklr
rno04071	Sphingolipid signaling pathway	Environmental Information Processing	1.27099	0.421646	0.76475	3	Fcer1a,Adora3,Ppp2r2c
rno00052	Galactose metabolism	Metabolism	1.8045	0.429372	0.771203	1	Galm
rno01524	Platinum drug resistance	Human Diseases	1.35337	0.437209	0.777728	2	Gsta4,Gsta3
rno00760	Nicotinate and nicotinamide metabolism	Metabolism	1.68005	0.452649	0.797524	1	Nmnat2
rno04728	Dopaminergic synapse	Organismal Systems	1.18833	0.46504	0.804707	3	Caly,Gng7,Ppp2r2c
rno04925	Aldosterone synthesis and secretion	Organismal Systems	1.26549	0.471723	0.804707	2	Cyp21a1,Adcy1
rno00350	Tyrosine metabolism	Metabolism	1.57166	0.474982	0.804707	1	Aldh3a1
rno04215	Apoptosis - multiple species	Cellular Processes	1.57166	0.474982	0.804707	1	Birc6
rno04146	Peroxisome	Cellular Processes	1.24927	0.478474	0.804707	2	Ephx2,Ech1
rno05020	Prion diseases	Human Diseases	1.52254	0.485808	0.809679	1	C8g
rno04640	Hematopoietic cell lineage	Organismal Systems	1.21804	0.49182	0.812381	2	Cd7,Itga1
rno04080	Neuroactive ligand-receptor interaction	Environmental Information Processing	1.06301	0.498964	0.816722	6	Adrb3,Htr1b,Chrnb4,Mcpt8l2,Tacr2,Adora3
rno05215	Prostate cancer	Human Diseases	1.18833	0.504951	0.816722	2	Ar,Fgfr2
rno04912	GnRH signaling pathway	Organismal Systems	1.17401	0.511434	0.816722	2	Pla2g4c,Adcy1
rno05418	Fluid shear stress and atherosclerosis	Human Diseases	1.10731	0.512107	0.816722	3	Prkaa2,Gsta4,Gsta3
rno04727	GABAergic synapse	Organismal Systems	1.16003	0.517863	0.818843	2	Gng7,Adcy1
rno00620	Pyruvate metabolism	Metabolism	1.35337	0.526936	0.819187	1	Pklr
rno04973	Carbohydrate digestion and absorption	Organismal Systems	1.35337	0.526936	0.819187	1	Atp1a2
rno04072	Phospholipase D signaling pathway	Environmental Information Processing	1.07474	0.532327	0.820671	3	Fcer1a,Pla2g4c,Adcy1
rno04975	Fat digestion and absorption	Organismal Systems	1.28214	0.546258	0.835188	1	Fabp1
rno04723	Retrograde endocannabinoid signaling	Organismal Systems	1.04403	0.552076	0.837164	3	Rims1,Gng7,Adcy1
rno04150	mTOR signaling pathway	Environmental Information Processing	1.02933	0.561767	0.83812	3	Wnt3,Prkaa2,Wnt2b
rno04932	Non-alcoholic fatty liver disease (NAFLD)	Human Diseases	1.02933	0.561767	0.83812	3	Adipoq,Prkaa2,Pklr
rno00600	Sphingolipid metabolism	Metabolism	1.10731	0.599647	0.887478	1	Gal3st1
rno05142	Chagas disease (American trypanosomiasis)	Human Diseases	0.984271	0.607415	0.89184	2	Ppp2r2c,Adcy1
rno00330	Arginine and proline metabolism	Metabolism	1.05916	0.616019	0.89735	1	Ckm
rno05030	Cocaine addiction	Human Diseases	1.03663	0.623953	0.901807	1	Rgs9
rno00510	N-Glycan biosynthesis	Metabolism	1.01503	0.631725	0.905962	1	Mgat5
rno00310	Lysine degradation	Metabolism	0.994315	0.639337	0.909826	1	Ash1l
rno05134	Legionellosis	Human Diseases	0.955322	0.654097	0.923724	1	Eef1a2
rno05221	Acute myeloid leukemia	Human Diseases	0.936951	0.66125	0.925162	1	Zbtb16
rno04611	Platelet activation	Organismal Systems	0.877864	0.669622	0.925162	2	Pla2g4c,Adcy1
rno04370	VEGF signaling pathway	Environmental Information Processing	0.902249	0.675118	0.925162	1	Pla2g4c
rno04730	Long-term depression	Organismal Systems	0.902249	0.675118	0.925162	1	Pla2g4c
rno04137	Mitophagy - animal	Cellular Processes	0.825787	0.707372	0.95041	1	Mitf
rno04068	FoxO signaling pathway	Environmental Information Processing	0.812024	0.710903	0.95041	2	Fbxo32,Prkaa2
rno04115	p53 signaling pathway	Cellular Processes	0.798712	0.719365	0.95041	1	Igfbp3
rno05230	Central carbon metabolism in cancer	Human Diseases	0.798712	0.719365	0.95041	1	Fgfr2
rno05034	Alcoholism	Human Diseases	0.792218	0.723679	0.95041	2	Hdac11,Gng7
rno04010	MAPK signaling pathway	Environmental Information Processing	0.815421	0.729253	0.95041	4	Cacna1e,Fgfr2,Pla2g4c,Cacna2d1
rno05218	Melanoma	Human Diseases	0.738203	0.747253	0.95041	1	Mitf
rno04630	Jak-STAT signaling pathway	Environmental Information Processing	0.74956	0.751659	0.95041	2	Lifr,Ctf1
rno04144	Endocytosis	Cellular Processes	0.785829	0.755541	0.95041	4	Adrb3,Fgfr2,Psd,Vps25
rno05222	Small cell lung cancer	Human Diseases	0.706108	0.762647	0.95041	1	Col4a3
rno04310	Wnt signaling pathway	Environmental Information Processing	0.732653	0.762891	0.95041	2	Wnt3,Wnt2b
rno05224	Breast cancer	Human Diseases	0.732653	0.762891	0.95041	2	Wnt3,Wnt2b
rno04610	Complement and coagulation cascades	Organismal Systems	0.658398	0.786261	0.95041	1	C8g
rno01230	Biosynthesis of amino acids	Metabolism	0.649619	0.790696	0.95041	1	Pklr
rno04514	Cell adhesion molecules (CAMs)	Environmental Information Processing	0.691084	0.790726	0.95041	2	Itgb8,Ntng1
rno01521	EGFR tyrosine kinase inhibitor resistance	Human Diseases	0.641071	0.79504	0.95041	1	Fgfr2
rno04060	Cytokine-cytokine receptor interaction	Environmental Information Processing	0.709535	0.800867	0.95041	3	Lifr,Cxcl14,Ctf1
rno04014	Ras signaling pathway	Environmental Information Processing	0.702713	0.806175	0.95041	3	Fgfr2,Gng7,Pla2g4c
rno03015	mRNA surveillance pathway	Genetic Information Processing	0.616727	0.807541	0.95041	1	Ppp2r2c
rno04350	TGF-beta signaling pathway	Environmental Information Processing	0.609018	0.811538	0.95041	1	Bmp8a
rno03013	RNA transport	Genetic Information Processing	0.658398	0.812695	0.95041	2	Thoc2,Eef1a2
rno04145	Phagosome	Cellular Processes	0.658398	0.812695	0.95041	2	Mpo,Sftpd
rno04666	Fc gamma R-mediated phagocytosis	Organismal Systems	0.601499	0.815452	0.95041	1	Scin
rno00564	Glycerophospholipid metabolism	Metabolism	0.587005	0.823039	0.95041	1	Pla2g4c
rno04540	Gap junction	Cellular Processes	0.587005	0.823039	0.95041	1	Adcy1
rno04530	Tight junction	Cellular Processes	0.636881	0.827113	0.95041	2	Prkaa2,Ppp2r2c
rno01522	Endocrine resistance	Human Diseases	0.553653	0.84068	0.956393	1	Adcy1
rno04915	Estrogen signaling pathway	Organismal Systems	0.5354	0.850415	0.956393	1	Adcy1
rno00240	Pyrimidine metabolism	Metabolism	0.529581	0.853527	0.956393	1	Dpyd
rno04062	Chemokine signaling pathway	Organismal Systems	0.594164	0.855397	0.956393	2	Gng7,Adcy1
rno04933	AGE-RAGE signaling pathway in diabetic complications	Human Diseases	0.512857	0.862481	0.956393	1	Col4a3
rno05145	Toxoplasmosis	Human Diseases	0.477661	0.881317	0.956393	1	Tlr11
rno05166	HTLV-I infection	Human Diseases	0.591758	0.888128	0.956393	3	Wnt3,Wnt2b,Adcy1
rno05203	Viral carcinogenesis	Human Diseases	0.538358	0.890935	0.956393	2	Scin,Hdac11
rno01200	Carbon metabolism	Metabolism	0.442922	0.899726	0.956393	1	Pklr
rno04142	Lysosome	Cellular Processes	0.435013	0.903866	0.956393	1	Mcpt8l2
rno05205	Proteoglycans in cancer	Human Diseases	0.515571	0.904709	0.956393	2	Wnt3,Wnt2b
rno04380	Osteoclast differentiation	Organismal Systems	0.431163	0.905872	0.956393	1	Mitf
rno05160	Hepatitis C	Human Diseases	0.423665	0.90976	0.956393	1	Ppp2r2c
rno04015	Rap1 signaling pathway	Environmental Information Processing	0.499707	0.913962	0.956393	2	Fgfr2,Adcy1
rno03040	Spliceosome	Genetic Information Processing	0.402656	0.920494	0.956393	1	Thoc2
rno04120	Ubiquitin mediated proteolysis	Genetic Information Processing	0.402656	0.920494	0.956393	1	Birc6
rno04140	Autophagy - animal	Cellular Processes	0.399356	0.922155	0.956393	1	Prkaa2
rno03010	Ribosome	Genetic Information Processing	0.392915	0.925375	0.956393	1	Rpl35al1
rno05206	MicroRNAs in cancer	Human Diseases	0.369102	0.936985	0.963012	1	Wnt3
rno04141	Protein processing in endoplasmic reticulum	Genetic Information Processing	0.312317	0.962104	0.976529	1	LOC103694875
rno04360	Axon guidance	Organismal Systems	0.30075	0.966638	0.976529	1	Ntng1
rno05016	Huntington's disease	Human Diseases	0.298904	0.967339	0.976529	1	Ppargc1a
rno05168	Herpes simplex infection	Human Diseases	0.288292	0.971251	0.976529	1	Per3
rno04740	Olfactory transduction	Organismal Systems	0.144717	1	1	3	Slc8a1,Pde1c,Gng7
