# Supplementary material for: Integrative transcriptomic and metabonomic profiling analyses reveal the molecular mechanism of Chinese traditional medicine huankuile suspension on TNBS-induced ulcerative colitis
Source: Aging (Albany NY). 2021 Feb 1;13(4):5087–103. doi: 10.18632/aging.202427 (PMC7950284; doi:10.18632/aging.202427)
Supplement: Supplementary Table 4 [file aging-13-202427-s004.xls]

## Sheet: Supplementary Table 4
Supplementary Table 4. The list of KEGG enrichment analysis of downregulated genes between HKL treated UC samples and water treated UC samples.
ID	Description	Class	GeneRatio	BgRatio	Enrich_factor	Pvalue	FDR	GeneCount	GeneID
rno04972	Pancreatic secretion	Organismal Systems	21/98	93/6821	15.7166	0	0	21	Pla2g1b,Cel,Cpa1,LOC286960,Prss3b,Cela2a,Pla2g2d,Pla2g2a,Pnlip,Pnliprp1,Pnliprp2,Ctrb1,Ctrl,Atp1a3,Cela3b,Cpa2,Cpb1,Prss3,Prss1,Prss2,Cckar
rno04974	Protein digestion and absorption	Organismal Systems	14/98	75/6821	12.9924	1.47327e-12	1.20071e-10	14	Cpa1,LOC286960,Prss3b,Cela2a,Ctrb1,Ctrl,Atp1a3,Cela3b,Col11a1,Cpa2,Cpb1,Prss3,Prss1,Prss2
rno04610	Complement and coagulation cascades	Organismal Systems	11/98	74/6821	10.3462	6.0265e-09	3.2744e-07	11	Serpinb2,Plg,C6,Fgg,Kng1,Serpina1,Cr2,Vsig4,C3,Cfb,Cfi
rno04975	Fat digestion and absorption	Organismal Systems	8/98	38/6821	14.6531	4.66577e-08	1.9013e-06	8	Clps,Pla2g1b,Cel,Pla2g2d,Pla2g2a,Pnlip,Pnliprp1,Pnliprp2
rno00100	Steroid biosynthesis	Metabolism	5/98	19/6821	18.3163	5.47756e-06	0.000178569	5	Cyp51,Sqle,Cel,Dhcr7,Lss
rno04640	Hematopoietic cell lineage	Organismal Systems	8/98	80/6821	6.9602	1.68513e-05	0.000457793	8	Tfrc,Cd8a,Il1r2,Cd19,Ms4a1,Cd22,Cr2,LOC103694380
rno05150	Staphylococcus aureus infection	Human Diseases	6/98	43/6821	9.71191	2.9919e-05	0.000696686	6	Plg,Fgg,LOC498276,C3,Cfb,Cfi
rno00591	Linoleic acid metabolism	Metabolism	4/98	32/6821	8.70026	0.00105819	0.0215606	4	Pla2g1b,Cyp2e1,Pla2g2d,Pla2g2a
rno00592	alpha-Linolenic acid metabolism	Metabolism	3/98	19/6821	10.9898	0.00235814	0.0427086	3	Pla2g1b,Pla2g2d,Pla2g2a
rno05164	Influenza A	Human Diseases	7/98	146/6821	3.33708	0.00486251	0.0792589	7	LOC286960,Prss3b,Plg,Prss3,Prss1,Prss2,LOC103694380
rno04657	IL-17 signaling pathway	Organismal Systems	5/98	84/6821	4.14298	0.00697037	0.0993841	5	S100a9,S100a8,Lcn2,Mmp9,LOC103694380
rno00561	Glycerolipid metabolism	Metabolism	4/98	54/6821	5.15571	0.00731662	0.0993841	4	Cel,Pnlip,Pnliprp1,Pnliprp2
rno04662	B cell receptor signaling pathway	Organismal Systems	4/98	66/6821	4.21831	0.0146375	0.177323	4	Cd79b,Cd19,Cd22,Cr2
rno04514	Cell adhesion molecules (CAMs)	Environmental Information Processing	6/98	141/6821	2.96179	0.0155981	0.177323	6	Cd8a,Siglec1,Cd22,RT1-CE3,RT1-T24-1,Glycam1
rno00590	Arachidonic acid metabolism	Metabolism	4/98	69/6821	4.0349	0.0169968	0.177323	4	Pla2g1b,Cyp2e1,Pla2g2d,Pla2g2a
rno00565	Ether lipid metabolism	Metabolism	3/98	40/6821	5.22015	0.0193522	0.177323	3	Pla2g1b,Pla2g2d,Pla2g2a
rno04612	Antigen processing and presentation	Organismal Systems	4/98	72/6821	3.86678	0.0195817	0.177323	4	Cd8a,RT1-CE3,RT1-T24-1,LOC103694380
rno05322	Systemic lupus erythematosus	Human Diseases	4/98	72/6821	3.86678	0.0195817	0.177323	4	C6,LOC498276,C3,LOC103694380
rno05332	Graft-versus-host disease	Human Diseases	3/98	45/6821	4.64014	0.0264061	0.226537	3	RT1-CE3,RT1-T24-1,LOC103694380
rno05330	Allograft rejection	Human Diseases	3/98	47/6821	4.44268	0.0295638	0.240945	3	RT1-CE3,RT1-T24-1,LOC103694380
rno05161	Hepatitis B	Human Diseases	5/98	126/6821	2.76199	0.0345299	0.26626	5	Ccne1,Ccna2,Mmp9,Birc5,LOC103694380
rno00900	Terpenoid backbone biosynthesis	Metabolism	2/98	21/6821	6.62877	0.0359369	0.26626	2	Hmgcs1,Idi1
rno04940	Type I diabetes mellitus	Human Diseases	3/98	54/6821	3.86678	0.04211	0.298431	3	RT1-CE3,RT1-T24-1,LOC103694380
rno00140	Steroid hormone biosynthesis	Metabolism	3/98	60/6821	3.4801	0.0546654	0.37015	3	Cyp2e1,Cyp11b2,Cyp1b1
rno04115	p53 signaling pathway	Cellular Processes	3/98	61/6821	3.42305	0.0569142	0.37015	3	Ccne1,Gtse1,Ccnb1
rno05140	Leishmaniasis	Human Diseases	3/98	62/6821	3.36784	0.0592065	0.37015	3	LOC498276,C3,LOC103694380
rno04145	Phagosome	Cellular Processes	5/98	148/6821	2.35142	0.0613131	0.37015	5	Tfrc,RT1-CE3,RT1-T24-1,LOC498276,C3
rno05340	Primary immunodeficiency	Human Diseases	2/98	33/6821	4.21831	0.0809378	0.471174	2	Cd8a,Cd19
rno00983	Drug metabolism - other enzymes	Metabolism	2/98	34/6821	4.09424	0.0852172	0.478979	2	Upp1,Tk1
rno04973	Carbohydrate digestion and absorption	Organismal Systems	2/98	36/6821	3.86678	0.0939752	0.510599	2	Atp1a3,LOC103689940
rno04080	Neuroactive ligand-receptor interaction	Environmental Information Processing	7/98	275/6821	1.77169	0.0998052	0.524558	7	LOC286960,Prss3b,Plg,Prss3,Prss1,Prss2,Cckar
rno04216	Ferroptosis	Cellular Processes	2/98	38/6821	3.66327	0.102981	0.524558	2	Tfrc,Slc7a11
rno00564	Glycerophospholipid metabolism	Metabolism	3/98	83/6821	2.51574	0.116529	0.538282	3	Pla2g1b,Pla2g2d,Pla2g2a
rno05203	Viral carcinogenesis	Human Diseases	5/98	181/6821	1.92271	0.118505	0.538282	5	Ccne1,Ccna2,RT1-CE3,RT1-T24-1,C3
rno05418	Fluid shear stress and atherosclerosis	Human Diseases	4/98	132/6821	2.10915	0.121456	0.538282	4	Il1r2,Mmp9,Nppc,LOC103694380
rno04978	Mineral absorption	Organismal Systems	2/98	42/6821	3.31438	0.121651	0.538282	2	Steap1,Atp1a3
rno00072	Synthesis and degradation of ketone bodies	Metabolism	1/98	9/6821	7.73356	0.122187	0.538282	1	Hmgcs1
rno00980	Metabolism of xenobiotics by cytochrome P450	Metabolism	2/98	46/6821	3.02618	0.141073	0.581284	2	Cyp2e1,Cyp1b1
rno04913	Ovarian steroidogenesis	Organismal Systems	2/98	46/6821	3.02618	0.141073	0.581284	2	Ldlr,Cyp1b1
rno00982	Drug metabolism - cytochrome P450	Metabolism	2/98	47/6821	2.96179	0.146029	0.581284	2	Cyp2e1,Fmo1
rno05169	Epstein-Barr virus infection	Human Diseases	5/98	194/6821	1.79387	0.146212	0.581284	5	Ccna2,Cd19,RT1-CE3,RT1-T24-1,Cr2
rno01100	Metabolic pathways	Metabolism	21/98	1166/6821	1.25355	0.155417	0.582866	21	Pla2g1b,Upp1,Cyp51,Sqle,Cel,Mthfd2,Cyp2e1,Alpl,Hmgcs1,Idi1,Pla2g2d,Pla2g2a,Pnlip,Pnliprp1,Pnliprp2,Cox6a2,Dhcr7,Cyp11b2,Tk1,Lss,LOC103689940
rno03450	Non-homologous end-joining	Genetic Information Processing	1/98	12/6821	5.80017	0.159535	0.582866	1	Fen1
rno05134	Legionellosis	Human Diseases	2/98	51/6821	2.72949	0.166192	0.582866	2	C3,LOC103694380
rno04668	TNF signaling pathway	Environmental Information Processing	3/98	99/6821	2.10915	0.169838	0.582866	3	Mmp9,Ripk3,LOC103694380
rno05320	Autoimmune thyroid disease	Human Diseases	2/98	52/6821	2.677	0.171309	0.582866	2	RT1-CE3,RT1-T24-1
rno00730	Thiamine metabolism	Metabolism	1/98	13/6821	5.354	0.171632	0.582866	1	Alpl
rno05152	Tuberculosis	Human Diseases	4/98	151/6821	1.84376	0.171641	0.582866	4	Lbp,LOC498276,C3,LOC103694380
rno00790	Folate biosynthesis	Metabolism	1/98	14/6821	4.97157	0.183556	0.610605	1	Alpl
rno04622	RIG-I-like receptor signaling pathway	Organismal Systems	2/98	57/6821	2.44218	0.197249	0.643031	2	Isg15,LOC103694380
rno04270	Vascular smooth muscle contraction	Organismal Systems	3/98	111/6821	1.88114	0.213625	0.665968	3	Pla2g1b,Pla2g2d,Pla2g2a
rno04110	Cell cycle	Cellular Processes	3/98	112/6821	1.86434	0.217384	0.665968	3	Ccne1,Ccna2,Ccnb1
rno00670	One carbon pool by folate	Metabolism	1/98	17/6821	4.09424	0.218319	0.665968	1	Mthfd2
rno04380	Osteoclast differentiation	Organismal Systems	3/98	113/6821	1.84784	0.221157	0.665968	3	LOC498276,LOC103694380,Oscar
rno05168	Herpes simplex infection	Human Diseases	4/98	169/6821	1.64739	0.224713	0.665968	4	RT1-CE3,RT1-T24-1,C3,LOC103694380
rno05416	Viral myocarditis	Human Diseases	2/98	65/6821	2.1416	0.239607	0.688378	2	RT1-CE3,RT1-T24-1
rno04976	Bile secretion	Organismal Systems	2/98	66/6821	2.10915	0.244944	0.688378	2	Ldlr,Atp1a3
rno05133	Pertussis	Human Diseases	2/98	66/6821	2.10915	0.244944	0.688378	2	C3,LOC103694380
rno05204	Chemical carcinogenesis	Human Diseases	2/98	67/6821	2.07767	0.250287	0.691471	2	Cyp2e1,Cyp1b1
rno04918	Thyroid hormone synthesis	Organismal Systems	2/98	69/6821	2.01745	0.260983	0.696418	2	Duoxa2,Atp1a3
rno04964	Proximal tubule bicarbonate reclamation	Organismal Systems	1/98	21/6821	3.31438	0.2624	0.696418	1	Atp1a3
rno04970	Salivary secretion	Organismal Systems	2/98	70/6821	1.98863	0.266334	0.696418	2	Atp1a3,Aqp5
rno01524	Platinum drug resistance	Human Diseases	2/98	72/6821	1.93339	0.277035	0.696418	2	Birc5,Top2a
rno04260	Cardiac muscle contraction	Organismal Systems	2/98	74/6821	1.88114	0.287729	0.696418	2	Cox6a2,Atp1a3
rno00650	Butanoate metabolism	Metabolism	1/98	24/6821	2.90009	0.293837	0.696418	1	Hmgcs1
rno01040	Biosynthesis of unsaturated fatty acids	Metabolism	1/98	24/6821	2.90009	0.293837	0.696418	1	Scd2
rno04977	Vitamin digestion and absorption	Organismal Systems	1/98	24/6821	2.90009	0.293837	0.696418	1	Pnlip
rno05310	Asthma	Human Diseases	1/98	24/6821	2.90009	0.293837	0.696418	1	LOC103694380
rno05206	MicroRNAs in cancer	Human Diseases	3/98	132/6821	1.58186	0.294803	0.696418	3	Ccne1,Mmp9,Cyp1b1
rno04064	NF-kappa B signaling pathway	Environmental Information Processing	2/98	77/6821	1.80785	0.303739	0.701221	2	Lbp,LOC103694380
rno00500	Starch and sucrose metabolism	Metabolism	1/98	26/6821	2.677	0.314055	0.701221	1	LOC103689940
rno04950	Maturity onset diabetes of the young	Human Diseases	1/98	26/6821	2.677	0.314055	0.701221	1	Bhlha15
rno04911	Insulin secretion	Organismal Systems	2/98	80/6821	1.74005	0.319688	0.701221	2	Atp1a3,Cckar
rno04914	Progesterone-mediated oocyte maturation	Organismal Systems	2/98	80/6821	1.74005	0.319688	0.701221	2	Ccna2,Ccnb1
rno05146	Amoebiasis	Human Diseases	2/98	82/6821	1.69761	0.330276	0.701221	2	Il1r2,LOC103694380
rno01523	Antifolate resistance	Human Diseases	1/98	28/6821	2.48579	0.3337	0.701221	1	LOC103694380
rno04932	Non-alcoholic fatty liver disease (NAFLD)	Human Diseases	3/98	142/6821	1.47047	0.334334	0.701221	3	Cyp2e1,Cox6a2,LOC103694380
rno04620	Toll-like receptor signaling pathway	Organismal Systems	2/98	83/6821	1.67716	0.335554	0.701221	2	Lbp,LOC103694380
rno04014	Ras signaling pathway	Environmental Information Processing	4/98	208/6821	1.3385	0.350042	0.722238	4	Pla2g1b,Pla2g2d,Pla2g2a,Fgf23
rno04215	Apoptosis - multiple species	Cellular Processes	1/98	31/6821	2.24523	0.362127	0.737834	1	Birc5
rno03410	Base excision repair	Genetic Information Processing	1/98	32/6821	2.17506	0.371334	0.738139	1	Fen1
rno05020	Prion diseases	Human Diseases	1/98	32/6821	2.17506	0.371334	0.738139	1	C6
rno03030	DNA replication	Genetic Information Processing	1/98	33/6821	2.10915	0.380409	0.742115	1	Fen1
rno00240	Pyrimidine metabolism	Metabolism	2/98	92/6821	1.51309	0.382439	0.742115	2	Upp1,Tk1
rno05143	African trypanosomiasis	Human Diseases	1/98	34/6821	2.04712	0.389354	0.746643	1	LOC103694380
rno04066	HIF-1 signaling pathway	Environmental Information Processing	2/98	96/6821	1.45004	0.402845	0.756942	2	Tfrc,Timp1
rno04960	Aldosterone-regulated sodium reabsorption	Organismal Systems	1/98	37/6821	1.88114	0.415429	0.756942	1	Atp1a3
rno05219	Bladder cancer	Human Diseases	1/98	37/6821	1.88114	0.415429	0.756942	1	Mmp9
rno04660	T cell receptor signaling pathway	Organismal Systems	2/98	99/6821	1.4061	0.417943	0.756942	2	Cd8a,LOC103694380
rno05142	Chagas disease (American trypanosomiasis)	Human Diseases	2/98	99/6821	1.4061	0.417943	0.756942	2	C3,LOC103694380
rno05145	Toxoplasmosis	Human Diseases	2/98	102/6821	1.36475	0.432851	0.77187	2	Ldlr,LOC103694380
rno04114	Oocyte meiosis	Cellular Processes	2/98	105/6821	1.32575	0.447558	0.77187	2	Ccne1,Ccnb1
rno04010	MAPK signaling pathway	Environmental Information Processing	4/98	239/6821	1.16489	0.451336	0.77187	4	Il1r2,Ntrk2,Fgf23,LOC103694380
rno00380	Tryptophan metabolism	Metabolism	1/98	42/6821	1.65719	0.456462	0.77187	1	Cyp1b1
rno04919	Thyroid hormone signaling pathway	Organismal Systems	2/98	107/6821	1.30097	0.457245	0.77187	2	Gata4,Atp1a3
rno04611	Platelet activation	Organismal Systems	2/98	111/6821	1.25409	0.476328	0.77187	2	Fgg,LOC498276
rno05166	HTLV-I infection	Human Diseases	4/98	247/6821	1.12716	0.476823	0.77187	4	Il1r2,RT1-CE3,RT1-T24-1,LOC103694380
rno04930	Type II diabetes mellitus	Human Diseases	1/98	45/6821	1.54671	0.479699	0.77187	1	LOC103694380
rno04144	Endocytosis	Cellular Processes	4/98	248/6821	1.12261	0.47998	0.77187	4	Tfrc,Ldlr,RT1-CE3,RT1-T24-1
rno04623	Cytosolic DNA-sensing pathway	Organismal Systems	1/98	46/6821	1.51309	0.487224	0.77187	1	Ripk3
rno04961	Endocrine and other factor-regulated calcium reabsorption	Organismal Systems	1/98	46/6821	1.51309	0.487224	0.77187	1	Atp1a3
rno00280	Valine, leucine and isoleucine degradation	Metabolism	1/98	47/6821	1.48089	0.494641	0.77187	1	Hmgcs1
rno04152	AMPK signaling pathway	Environmental Information Processing	2/98	115/6821	1.21047	0.495006	0.77187	2	Ccna2,Scd2
rno05160	Hepatitis C	Human Diseases	2/98	115/6821	1.21047	0.495006	0.77187	2	Ldlr,LOC103694380
rno01212	Fatty acid metabolism	Metabolism	1/98	48/6821	1.45004	0.501952	0.77187	1	Scd2
rno05144	Malaria	Human Diseases	1/98	48/6821	1.45004	0.501952	0.77187	1	LOC103694380
rno05014	Amyotrophic lateral sclerosis (ALS)	Human Diseases	1/98	50/6821	1.39204	0.516262	0.781436	1	LOC103694380
rno04068	FoxO signaling pathway	Environmental Information Processing	2/98	120/6821	1.16003	0.517761	0.781436	2	Sod2,Ccnb1
rno04210	Apoptosis	Cellular Processes	2/98	125/6821	1.11363	0.539838	0.805621	2	Birc5,LOC103694380
rno05321	Inflammatory bowel disease (IBD)	Human Diseases	1/98	54/6821	1.28893	0.543671	0.805621	1	LOC103694380
rno05210	Colorectal cancer	Human Diseases	1/98	56/6821	1.24289	0.556793	0.817633	1	Birc5
rno04060	Cytokine-cytokine receptor interaction	Environmental Information Processing	3/98	206/6821	1.01362	0.572612	0.824819	3	Il1r2,Tnfsf8,LOC103694380
rno04310	Wnt signaling pathway	Environmental Information Processing	2/98	133/6821	1.04665	0.573708	0.824819	2	Sfrp1,Sfrp4
rno04621	NOD-like receptor signaling pathway	Organismal Systems	2/98	135/6821	1.03114	0.581892	0.824819	2	Ripk3,LOC103694380
rno04213	Longevity regulating pathway - multiple species	Organismal Systems	1/98	60/6821	1.16003	0.581928	0.824819	1	Sod2
rno04664	Fc epsilon RI signaling pathway	Organismal Systems	1/98	62/6821	1.12261	0.593961	0.834617	1	LOC103694380
rno05202	Transcriptional misregulation in cancer	Human Diseases	2/98	143/6821	0.973455	0.613485	0.845792	2	Il1r2,Mmp9
rno05218	Melanoma	Human Diseases	1/98	66/6821	1.05458	0.617007	0.845792	1	Fgf23
rno04920	Adipocytokine signaling pathway	Organismal Systems	1/98	68/6821	1.02356	0.62804	0.845792	1	LOC103694380
rno04971	Gastric acid secretion	Organismal Systems	1/98	68/6821	1.02356	0.62804	0.845792	1	Atp1a3
rno05222	Small cell lung cancer	Human Diseases	1/98	69/6821	1.00873	0.633438	0.845792	1	Ccne1
rno04022	cGMP-PKG signaling pathway	Environmental Information Processing	2/98	154/6821	0.903923	0.653941	0.845792	2	Gata4,Atp1a3
rno03320	PPAR signaling pathway	Organismal Systems	1/98	74/6821	0.940568	0.659286	0.845792	1	Scd2
rno05410	Hypertrophic cardiomyopathy (HCM)	Human Diseases	1/98	74/6821	0.940568	0.659286	0.845792	1	LOC103694380
rno04925	Aldosterone synthesis and secretion	Organismal Systems	1/98	77/6821	0.903923	0.673921	0.845792	1	Ldlr
rno05323	Rheumatoid arthritis	Human Diseases	1/98	77/6821	0.903923	0.673921	0.845792	1	LOC103694380
rno05414	Dilated cardiomyopathy	Human Diseases	1/98	77/6821	0.903923	0.673921	0.845792	1	LOC103694380
rno04146	Peroxisome	Cellular Processes	1/98	78/6821	0.892334	0.678659	0.845792	1	Sod2
rno05132	Salmonella infection	Human Diseases	1/98	78/6821	0.892334	0.678659	0.845792	1	Lbp
rno05010	Alzheimer's disease	Human Diseases	2/98	162/6821	0.859284	0.681222	0.845792	2	Cox6a2,LOC103694380
rno05016	Huntington's disease	Human Diseases	2/98	163/6821	0.854013	0.684507	0.845792	2	Sod2,Cox6a2
rno04350	TGF-beta signaling pathway	Environmental Information Processing	1/98	80/6821	0.870026	0.687932	0.845792	1	LOC103694380
rno04666	Fc gamma R-mediated phagocytosis	Organismal Systems	1/98	81/6821	0.859284	0.692469	0.845792	1	LOC498276
rno05215	Prostate cancer	Human Diseases	1/98	82/6821	0.848805	0.696941	0.845792	1	Ccne1
rno04650	Natural killer cell mediated cytotoxicity	Organismal Systems	1/98	83/6821	0.838579	0.701348	0.845792	1	LOC103694380
rno04211	Longevity regulating pathway	Organismal Systems	1/98	84/6821	0.828596	0.705691	0.845792	1	Sod2
rno01522	Endocrine resistance	Human Diseases	1/98	88/6821	0.790932	0.72245	0.859557	1	Mmp9
rno04915	Estrogen signaling pathway	Organismal Systems	1/98	91/6821	0.764858	0.734395	0.867438	1	Mmp9
rno04933	AGE-RAGE signaling pathway in diabetic complications	Human Diseases	1/98	95/6821	0.732653	0.749535	0.87834	1	LOC103694380
rno05200	Pathways in cancer	Human Diseases	4/98	353/6821	0.788692	0.754403	0.87834	4	Ccne1,Mmp9,Birc5,Fgf23
rno05205	Proteoglycans in cancer	Human Diseases	2/98	189/6821	0.73653	0.760653	0.879336	2	Mmp9,LOC103694380
rno04931	Insulin resistance	Human Diseases	1/98	102/6821	0.682373	0.774001	0.888465	1	LOC103694380
rno04670	Leukocyte transendothelial migration	Organismal Systems	1/98	105/6821	0.662877	0.783747	0.893362	1	Mmp9
rno04151	PI3K-Akt signaling pathway	Environmental Information Processing	3/98	292/6821	0.715089	0.797549	0.901854	3	Ccne1,Cd19,Fgf23
rno04071	Sphingolipid signaling pathway	Environmental Information Processing	1/98	115/6821	0.605235	0.813328	0.901854	1	LOC103694380
rno04722	Neurotrophin signaling pathway	Organismal Systems	1/98	115/6821	0.605235	0.813328	0.901854	1	Ntrk2
rno05162	Measles	Human Diseases	1/98	115/6821	0.605235	0.813328	0.901854	1	Ccne1
rno04120	Ubiquitin mediated proteolysis	Genetic Information Processing	1/98	121/6821	0.575223	0.829115	0.906365	1	Ube2c
rno00190	Oxidative phosphorylation	Metabolism	1/98	122/6821	0.570509	0.831615	0.906365	1	Cox6a2
rno05034	Alcoholism	Human Diseases	1/98	123/6821	0.56587	0.834078	0.906365	1	Ntrk2
rno04630	Jak-STAT signaling pathway	Environmental Information Processing	1/98	130/6821	0.5354	0.850351	0.91177	1	Gfap
rno05012	Parkinson's disease	Human Diseases	1/98	131/6821	0.531313	0.852542	0.91177	1	Cox6a2
rno05224	Breast cancer	Human Diseases	1/98	133/6821	0.523324	0.856831	0.91177	1	Fgf23
rno04261	Adrenergic signaling in cardiomyocytes	Organismal Systems	1/98	136/6821	0.51178	0.863034	0.91177	1	Atp1a3
rno04390	Hippo signaling pathway	Environmental Information Processing	1/98	138/6821	0.504363	0.867021	0.91177	1	Birc5
rno04150	mTOR signaling pathway	Environmental Information Processing	1/98	142/6821	0.490155	0.874652	0.9139	1	LOC103694380
rno04530	Tight junction	Cellular Processes	1/98	153/6821	0.454915	0.893476	0.926526	1	Gata4
rno04141	Protein processing in endoplasmic reticulum	Genetic Information Processing	1/98	156/6821	0.446167	0.898105	0.926526	1	Cryaa
rno04360	Axon guidance	Organismal Systems	1/98	162/6821	0.429642	0.906773	0.929585	1	Slit3
rno04020	Calcium signaling pathway	Environmental Information Processing	1/98	172/6821	0.404663	0.919628	0.936871	1	Cckar
rno04024	cAMP signaling pathway	Environmental Information Processing	1/98	187/6821	0.372203	0.935691	0.942913	1	Atp1a3
rno04810	Regulation of actin cytoskeleton	Cellular Processes	1/98	192/6821	0.362511	0.940304	0.942913	1	Fgf23
rno04015	Rap1 signaling pathway	Environmental Information Processing	1/98	195/6821	0.356934	0.942913	0.942913	1	Fgf23
