# Supplementary material for: Integrative transcriptomic and metabonomic profiling analyses reveal the molecular mechanism of Chinese traditional medicine huankuile suspension on TNBS-induced ulcerative colitis
Source: Aging (Albany NY). 2021 Feb 1;13(4):5087–103. doi: 10.18632/aging.202427 (PMC7950284; doi:10.18632/aging.202427)
Supplement: Supplementary Table 5 [file aging-13-202427-s005.xlsx]

## Sheet: Sheet1
Supplementary Table 5. The list of differential metabolites between HKL treated UC samples and water treated UC samples.
metabolite name	FC（C/M）	log2(FC)	raw.pval	vip	KEGG
3a-OH-5aH-Degestrel	0.011236	-6.4757	0.026221	1.3386
Met Trp Glu Cys	0.014454	-6.1124	0.012673	1.4562
cholacalcioic acid	0.014748	-6.0833	0.010677	1.4808
Levan	0.042782	-4.5469	0.0062255	1.5516	C01355
delta2-THA	0.060966	-4.0359	0.0041195	1.5997
3-2,4-Cyclopentadien-1-ylidene-5alpha-androstan-17beta-ol	0.067422	-3.8906	0.00069966	1.7601
Asn Glu Gly Lys	0.071428	-3.8074	0.00036178	1.805
Mometasone furoate	0.078334	-3.6742	0.0009207	1.7394	C07816
3-Oxochol-4-en-24-oic Acid	0.081653	-3.6144	0.0023665	1.6572
Maltose	0.083273	-3.586	0.012221	1.4615	C00208
Glutinosone	0.087313	-3.5177	0.0004358	1.793
22E-3alpha,12alpha-Dihydroxy-5beta-chol-22-en-24-oic Acid	0.11152	-3.1646	0.0017432	1.6858
D-PANTOTHENIC ACID	0.12884	-2.9563	0.00026312	1.8244	C00864
3-keto Petromyzonol	0.14143	-2.8218	0.003434	1.6194
Docosahexaenoic Acid ethyl ester	0.1512	-2.7255	0.00312	1.6295
Stercobilin	0.15528	-2.6871	0.0083391	1.5144	C05793
5,6-dehydro Arachidonic Acid	0.15617	-2.6788	0.0057403	1.5615
Glycerophosphocholine	0.16783	-2.5749	0.012649	1.4565	C00670
beta-D-Glucosamine	0.17379	-2.5246	0.0081054	1.5182	C08349
Momilactone B	0.17892	-2.4826	0.022042	1.3688
Bufadienolide	0.19526	-2.3565	0.0086488	1.5096
2-Methylbutyroylcarnitine	0.21545	-2.2146	2.9161e-05	1.9272
245 n-3 C245n-3,6,9,12,15	0.2338	-2.0967	0.017256	1.409
2,7-Anhydro-alpha-N-acetylneuraminic acid	0.24334	-2.039	0.020455	1.3814
L-Ascorbic acid	0.24562	-2.0255	0.0017883	1.6835	C00072
LysoPE150/00	0.25732	-1.9584	0.028975	1.3205
Asp Asn Val Ser	0.26439	-1.9193	0.035551	1.2819
3-ketosphinganine	0.29225	-1.7747	0.00031114	1.8143	C02934
myo-Inositol	0.32042	-1.642	0.0017058	1.6878	C00137
cholesterol sulfate	0.32386	-1.6266	0.0094163	1.4982	C18043
delta2-trans-Hexadecenoic Acid	0.32404	-1.6258	0.010119	1.4883
Galactosylhydroxylysine	0.32813	-1.6077	0.018727	1.3959	C05547
omega-3 Arachidonic Acid	0.33461	-1.5794	0.0018231	1.6817
CITRATE	0.33552	-1.5755	0.00092866	1.7387	C00158
N-METHYL-L-GLUTAMATE	0.34202	-1.5479	0.0022936	1.6602
Heptadecanoyl carnitine	0.34742	-1.5252	0.0018924	1.6783
Chol-11-Enic Acid	0.34838	-1.5213	0.010804	1.4792
Glutathione	0.34871	-1.5199	4.3699e-06	1.9844	C00051
1112-EpETE	0.35401	-1.4981	0.012685	1.4561
2-3-Hydroxycyclohexyl-5-2-methyl-2-octanylphenol	0.42678	-1.2284	0.033606	1.2928
Semilepidinoside B	0.43031	-1.2165	0.020076	1.3845
Orotidine	0.43133	-1.2131	0.00049528	1.7844	C01103
Gamma Glutamylglutamic acid	0.43185	-1.2114	0.015039	1.4305	C05282
Oleoyl Ethanolamide-d2	0.43494	-1.2011	0.001534	1.6972
Guanosine	0.4374	-1.193	0.0084978	1.512	C00387
Inosine	0.44842	-1.1571	0.00011737	1.8679	C00294
CREATINE	0.46377	-1.1085	0.00041118	1.7968	C00300
Propionylcarnitine	0.46888	-1.0927	0.044608	1.2364	C03017
2-amino-octadecanoic acid	0.49465	-1.0155	0.00061876	1.769
HYPOXANTHINE	0.51391	-0.96041	7.3123e-05	1.8901	C00262
Phosphoric acid	0.51711	-0.95146	0.00049618	1.7843	C00009
PE2055Z,8Z,11Z,14Z,17Z/00	0.51971	-0.94422	0.012471	1.4586
5-L-Glutamyl-L-alanine	0.53013	-0.91557	0.032351	1.3	C03740
Epigallocatechin	0.53332	-0.90692	0.029681	1.3161	C09727
7Z, 10Z, 13Z, 16Z, 19Z-docosapentaenoic acid	0.53435	-0.90415	0.047769	1.222
Uridine	0.5463	-0.87223	0.0019024	1.6778	C00299
Taurine	0.57792	-0.79105	0.00059834	1.7714	C00245
PC2247Z,10Z,13Z,16Z/00	0.58242	-0.77986	0.023626	1.3569
Glutamine	0.5868	-0.76906	0.0075384	1.5276	C00064
D-Serine	0.59509	-0.74883	9.9249e-05	1.876	C00740
ADMA	0.61489	-0.70159	0.037135	1.2734	C03626
Pregnenolone	0.62188	-0.68528	0.044593	1.2364	C01953
Phosphatidylcholine lyso 182	0.63432	-0.65672	0.0098209	1.4924
PC2257Z,10Z,13Z,16Z,19Z/160	0.66004	-0.59937	0.044871	1.2352
gamma-Glutamylleucine	0.66645	-0.58543	0.026402	1.3373
PC2045Z,8Z,11Z,14Z/00	1.5507	0.63296	0.0075171	1.528
Methionine	1.5517	0.63382	0.024364	1.3515	C00073
Thioguanine	1.5709	0.65159	0.01315	1.4508
3-Methyl-quinolin-2-ol	1.5746	0.65495	4.825e-05	1.9078
D-Pantetheine 4'-phosphate	1.6092	0.68633	0.0077271	1.5244	C01134
3-Hydroxyisovalerylcarnitine	1.6132	0.68992	0.039916	1.2591
PCO-1629E,10E/00U	1.6248	0.70027	0.0076468	1.5258
LysoPC2254Z,7Z,10Z,13Z,16Z	1.6258	0.70112	0.0097346	1.4936
Heptadecanoic acid	1.6713	0.74101	0.046613	1.2272
Isostearic acid	1.6736	0.74294	0.0036453	1.3321
Niacinamide	1.6745	0.74375	0.0074795	1.5286	C00153
PC160/00U	1.6903	0.75731	0.00026024	1.825
Stearic acid	1.6979	0.76374	0.033689	1.2923	C01530
14Z-Eicosenoic Acid	1.7244	0.78606	0.035492	1.2822
3-Methylpentan-2-one	1.73	0.7908	0.039977	1.2587
Myristoylcarnitine	1.7643	0.81909	0.019387	1.3902
2-Protocatechoylphloroglucinolcarboxylate	1.7815	0.8331	0.00016709	1.8498
PC70/O-80	1.7999	0.84791	0.0021403	1.6668
L-GLUTAMINE	1.8181	0.86246	0.00062652	1.7681	C00064
Streptidine	1.8464	0.88471	0.002568	1.6492
Arabinosylhypoxanthine	1.8473	0.8854	4.8549e-05	1.9075
Pregabalin	1.8498	0.88737	0.012444	1.4589
L-CARNITINE	1.8921	0.92	0.027165	1.3322	C00318
3-Guanidinopropanoate	1.9014	0.92703	0.00063823	1.7668	C03065
Pseudouridine	1.9066	0.93101	0.0011636	1.7206	C02067
3-amino-octanoic acid	1.915	0.93736	0.03274	1.2977
PC1836Z,9Z,12Z/00U	1.9841	0.98845	0.00027471	1.8218
Guanine	2.0025	1.0018	0.013309	1.449	C00242
1-Oleoylglycerophosphocholine	2.0885	1.0624	0.00018102	1.8455	C04230
cis-4-Carboxymethylenebut-2-en-4-olide	2.0919	1.0648	0.0035021	1.6174
N-3S-hydroxydecanoyl-L-serine	2.1047	1.0736	0.023406	1.3585
1-Palmitoylglycerophosphocholine	2.1478	1.1029	0.00018081	1.8456
PC160/00	2.2884	1.1943	9.0569e-05	1.8803
PE1919Z/00	2.3086	1.207	0.00089015	1.742
Tridecanoic acid	2.3976	1.2616	0.0055664	1.5651	C17076
Acetylcarnitine	2.4654	1.3018	0.001634	1.6916	C02571
Cysteinylglycine	2.5455	1.348	5.9662e-05	1.8989	C01419
Azinphos-ethyl	2.566	1.3595	2.0383e-06	2.0017
Hex-Honaucin A	2.628	1.3939	1.8509e-05	1.9431
S-Adenosyl-methionine	2.6618	1.4124	0.040815	1.2546	C00019
Nicotinamide	2.7489	1.4588	9.7559e-05	1.8768	C00153
5-Deoxy-5-methylthioadenosine	2.7517	1.4603	0.049075	1.2163
N-Butyl-1H-pyrazolo3,4-dpyrimidin-4-amine	2.9691	1.57	0.021959	1.3694
PCO-1411E/00	2.9746	1.5727	0.034683	1.2867
S-Acetyldihydrolipoamide-E	3.0195	1.5943	0.017185	1.4097	C16255
Pentadecanoic acid	3.2984	1.7218	0.03178	1.3033	C16537
Allopurinol	3.5803	1.8401	0.037664	1.2706
12-methyl myristic acid	3.7492	1.9066	0.020134	1.4851
2-Methylbutyric acid	3.7616	1.9113	0.00044892	1.791	C18319
PEO-180/00	3.9252	1.9728	0.045625	1.2317
arachidic acid	3.9496	1.9817	0.0034319	1.6195	C06425
PEP-160/00	4.0944	2.0337	0.049144	1.216
Serotonin	4.6018	2.2022	0.0080792	1.5186	C00780
Isobutyric acid	5.0571	2.3383	0.00016285	1.8512	C02632
7,7-dimethyl-5,8-Eicosadienoic Acid	5.107	2.3525	0.0074788	1.5286
5-Methylcytidine	5.1655	2.3689	0.00094442	1.7374
Enterolactone	5.6756	2.5048	0.035464	1.2824
Methyltestosterone	6.7543	2.7558	0.0089042	1.5057	C07198
Asn Asn Gly Lys	7.0421	2.816	0.0021715	1.6655
OROTATE	7.164	2.8408	1.0382e-05	1.9612	C00295
PCO-16111Z/00	7.2608	2.8601	0.02977	1.3155
5-Aminoimidazole ribonucleotide	7.2654	2.861	0.00052076	1.781	C03373
Cholic acid	7.5066	2.9082	0.0084895	1.5121	C00695
sn-Glycero-3-phosphocholine	7.8815	2.9785	0.00014309	1.8579	C00670
PCO-140/00	8.2911	3.0516	0.025704	1.3421
15R-Pinane Thromboxane A2	10.911	3.4477	0.044624	1.2363
N-Acetyl Mesalazine	11.649	3.5421	0.0039519	1.6043
Pregnan-20-one, 17-acetyloxy-3-hydroxy-6-methyl-, 3b,5b,6a-	11.789	3.5593	0.0052323	1.5725
Deoxycholic Acid	12.854	3.6841	0.00020028	1.84	C04483
p-Cresol sulfate	16.602	4.0533	0.00067021	1.7632
16,16-dimethyl-PGA1	58.063	5.8595	0.019933	1.3856
